# Supplementary material for: Epoxidized Methyl Esters and Triglycerides of Vegetable Oils Unsaturated Fatty Acids as New Reagents for the Preparation of Emulsifiers Based on Glycerol and Its Oligomers
Source: Preprints.org preprint supplement (doi:10.20944/preprints201712.0167.v1), 2017-12-25

Supplementary Materials:

# Epoxidized methyl esters and triglycerides of vegetable oils unsaturated fatty acids as new reagents for the preparation of emulsifiers based on glycerol and its oligomers

Khidmet Shikhaliev <sup>1</sup>, Nadezhda Stolpovskaya <sup>1</sup>, Michael Krysin <sup>1\*</sup>, Anna Zorina <sup>1</sup>, Denis Lyapun <sup>1</sup>, and Fedor Zubkov <sup>2</sup>

<sup>1</sup> Department of Organic Chemistry, Faculty of Chemistry, Voronezh State University, 1 Universitetskaya sq., Voronezh 394018, Russian Federation; chocd261@chem.vsu.ru

<sup>2</sup> Department of Organic Chemistry, Faculty of Physics and Mathematics and Natural Sciences; RUDN University, 6 Miklukho-Maklaya St., Moscow 117198, Russian Federation; fzubkov@sci.pfu.edu.ru

\* Correspondence: kaf261@rambler.ru; Tel.: +7-473-220-8433

## GC-MC and MS-ESI analysis data of polyglycerol 8

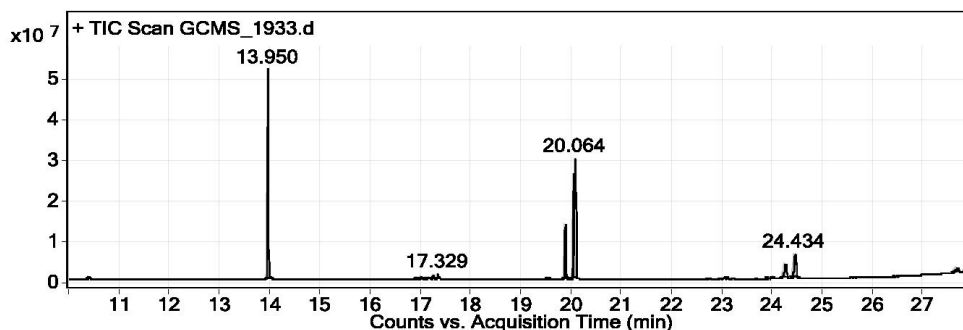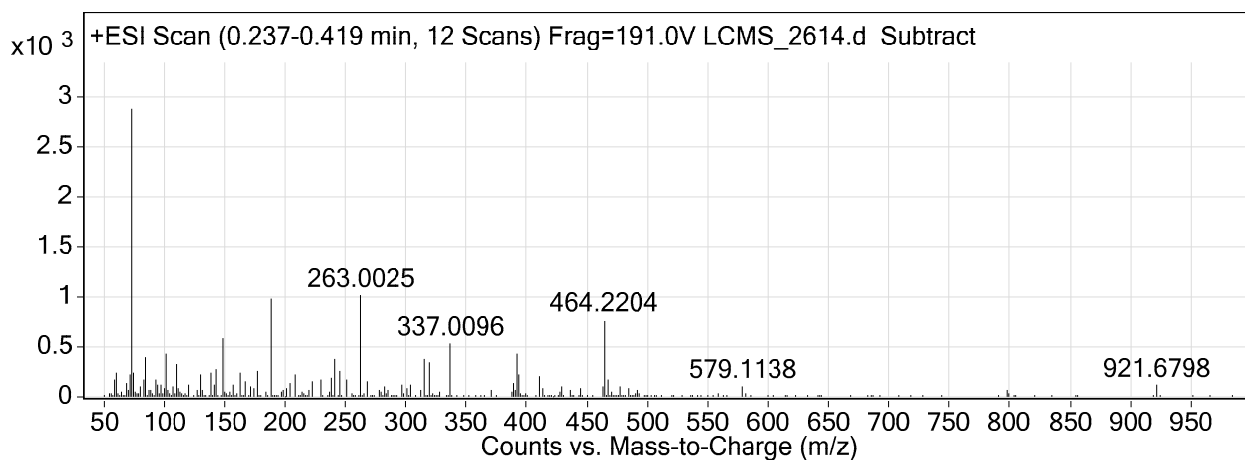

| m/z     | Species | Abund  | Abund % |
|---------|---------|--------|---------|
| 59,0421 |         | 138,01 | 4,8     |
| 59,0819 |         | 169,08 | 5,88    |
| 59,0934 |         | 124,82 | 4,34    |
| 59,1425 |         | 116,09 | 4,04    |
| 60,0711 |         | 216,41 | 7,53    |
| 69,0424 |         | 136,03 | 4,73    |
| 71,9235 |         | 203,82 | 7,09    |
| 73,0562 |         | 117,44 | 4,09    |
| 74,0303 |         | 2874,6 | 100     |
| 74,0671 |         | 690,25 | 24,01   |
| 74,1452 |         | 134,77 | 4,69    |
| 74,1649 |         | 239,11 | 8,32    |
| 75,012  |         | 244,61 | 8,51    |
| 75,0153 |         | 163,67 | 5,69    |
| 75,0319 |         | 218,58 | 7,6     |
| 75,0913 |         | 174,51 | 6,07    |
| 80,0178 |         | 109,1  | 3,8     |
| 83,0213 |         | 166,07 | 5,78    |
| 84,9251 |         | 397,49 | 13,83   |
| 93,0313 |         | 146,96 | 5,11    |
| 94,0261 |         | 107,73 | 3,75    |
| 95,0465 |         | 119,39 | 4,15    |
| 98,0534 |         | 124,19 | 4,32    |
| 102,086 |         | 256,3  | 8,92    |

|          |  |         |       |
|----------|--|---------|-------|
| 102,1064 |  | 422,4   | 14,69 |
| 111,068  |  | 332,98  | 11,58 |
| 111,0928 |  | 102,01  | 3,55  |
| 120,9904 |  | 122,97  | 4,28  |
| 130,9474 |  | 219,09  | 7,62  |
| 131,0144 |  | 127,62  | 4,44  |
| 139,017  |  | 240,91  | 8,38  |
| 142,1252 |  | 112,43  | 3,91  |
| 142,942  |  | 270,1   | 9,4   |
| 142,967  |  | 125,04  | 4,35  |
| 148,9615 |  | 580,38  | 20,19 |
| 149,0437 |  | 162,34  | 5,65  |
| 163,0622 |  | 246,49  | 8,57  |
| 167,0184 |  | 147,51  | 5,13  |
| 176,9328 |  | 254,75  | 8,86  |
| 188,9936 |  | 977,11  | 33,99 |
| 189,0197 |  | 439,82  | 15,3  |
| 204,9513 |  | 131,85  | 4,59  |
| 209,062  |  | 230,92  | 8,03  |
| 223,0229 |  | 154,81  | 5,39  |
| 230,1509 |  | 176,75  | 6,15  |
| 239,0607 |  | 196,01  | 6,82  |
| 241,0274 |  | 369,71  | 12,86 |
| 244,998  |  | 265     | 9,22  |
| 250,9384 |  | 175,14  | 6,09  |
| 263,0025 |  | 1009,58 | 35,12 |
| 263,0318 |  | 272,81  | 9,49  |
| 268,9937 |  | 154,97  | 5,39  |
| 282,1927 |  | 105,85  | 3,68  |
| 297,0269 |  | 128,6   | 4,47  |
| 304,1723 |  | 128,01  | 4,45  |
| 315,0359 |  | 373,91  | 13,01 |
| 319,0015 |  | 350,89  | 12,21 |
| 319,0403 |  | 102,78  | 3,58  |
| 337,0096 |  | 528,09  | 18,37 |
| 389,0367 |  | 129,81  | 4,52  |
| 392,1253 |  | 119,98  | 4,17  |
| 392,1656 |  | 402,74  | 14,01 |
| 393,0077 |  | 231,26  | 8,05  |
| 393,0519 |  | 116,26  | 4,04  |
| 393,177  |  | 102,47  | 3,56  |
| 411,0136 |  | 197,94  | 6,89  |
| 463,048  |  | 103,7   | 3,61  |
| 464,2204 |  | 763,43  | 26,56 |
| 465,2228 |  | 160,09  | 5,57  |
| 467,0156 |  | 169,44  | 5,89  |
| 478,2115 |  | 100,23  | 3,49  |
| 579,1138 |  | 104     | 3,62  |
| 921,6798 |  | 113,04  | 3,93  |

# IR, <sup>1</sup>H NMR spectra of oils and FAME

*Sunflower oil 11a*

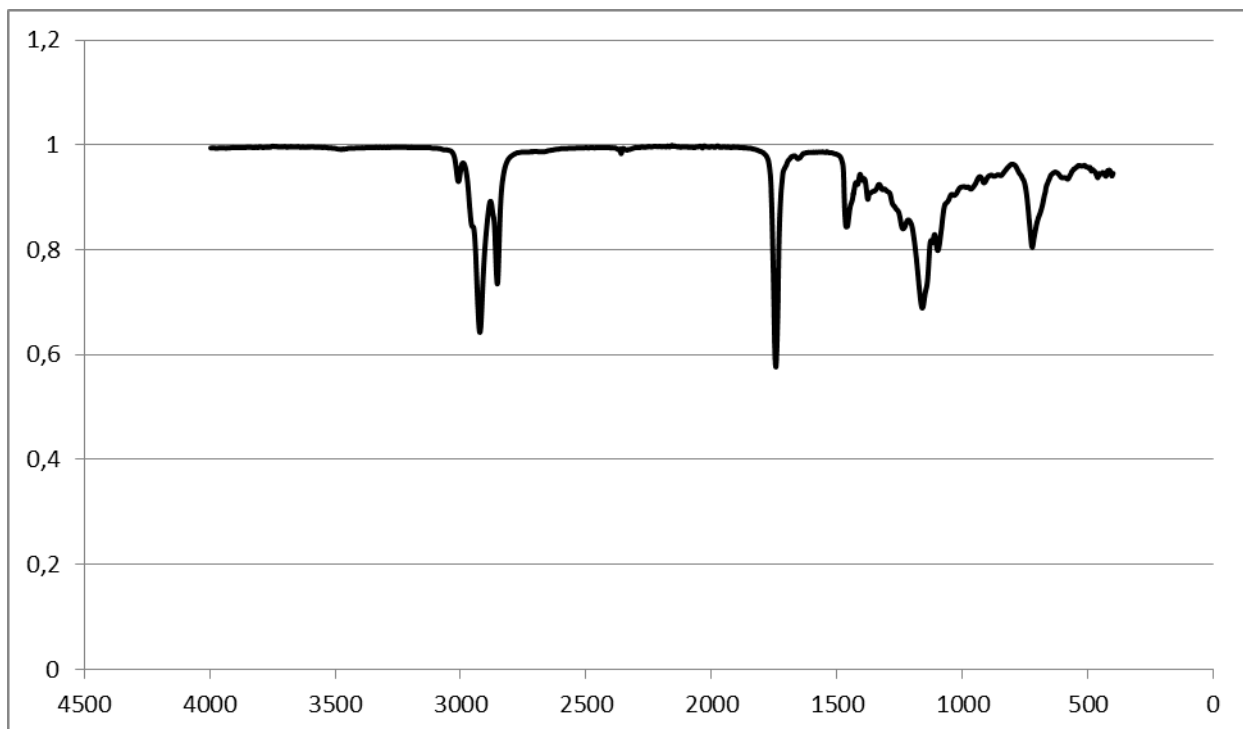



*Soybean oil 11b*

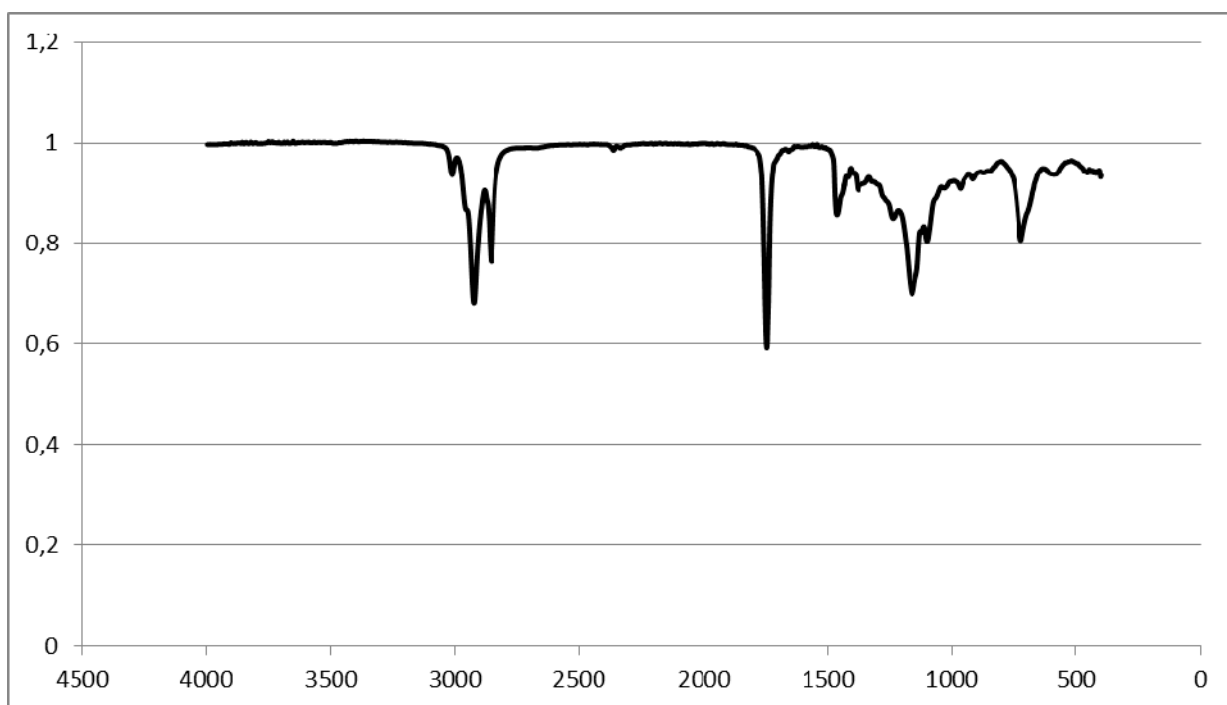

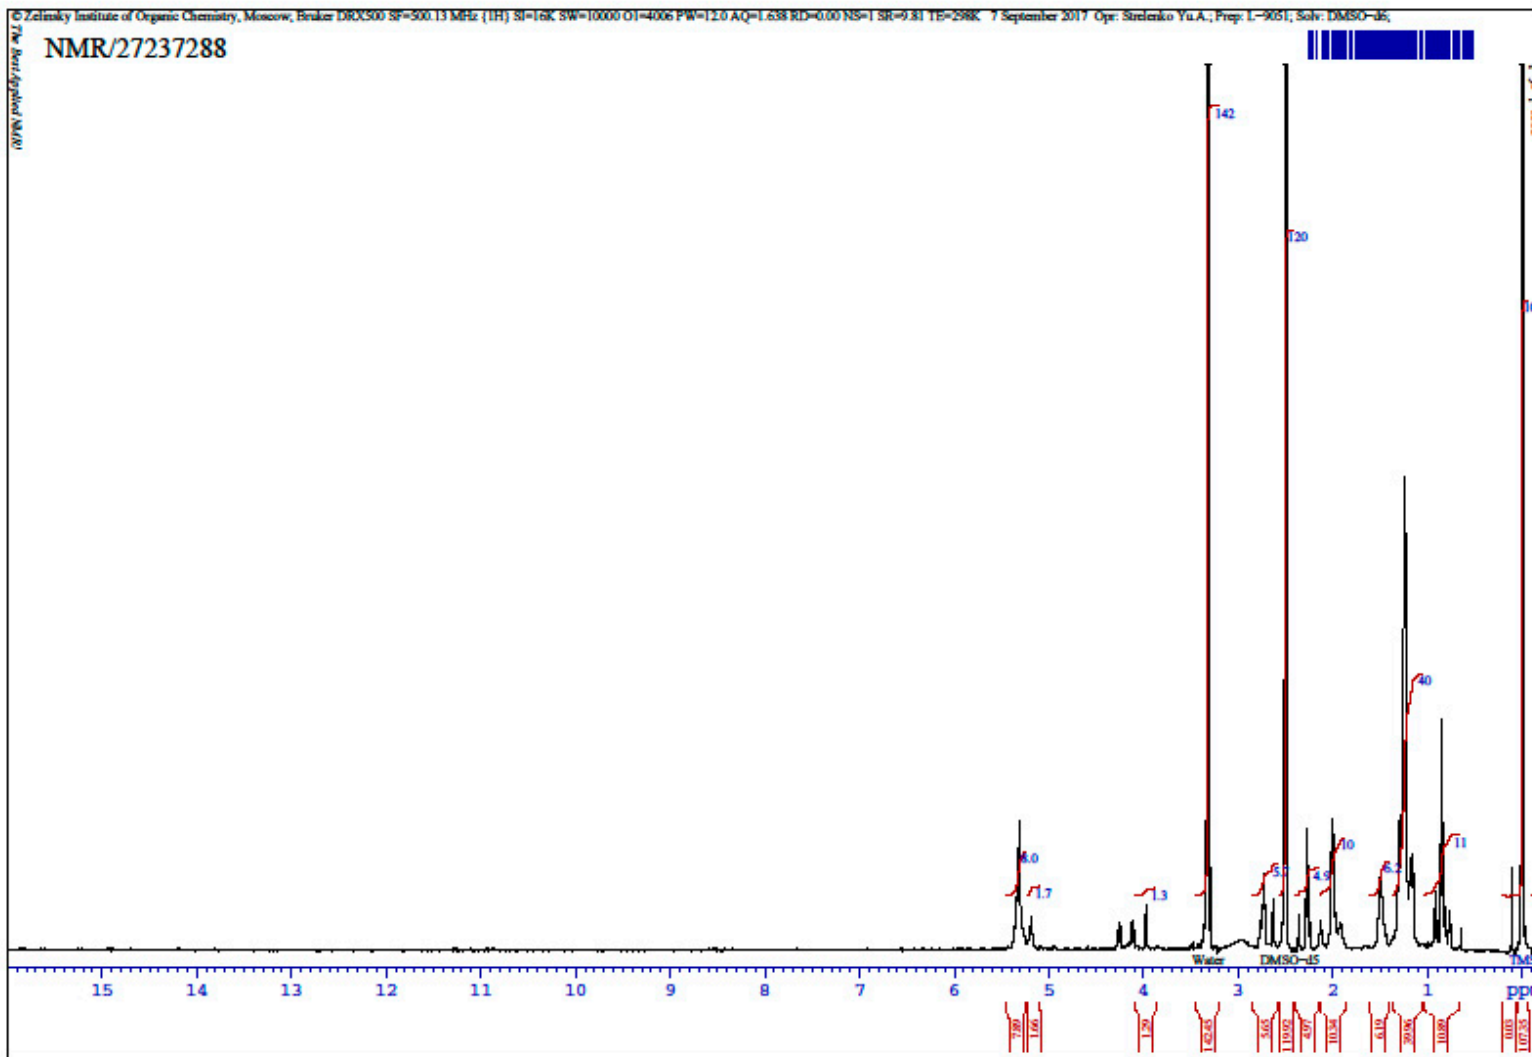

*Sunflower oil FAME 12a*

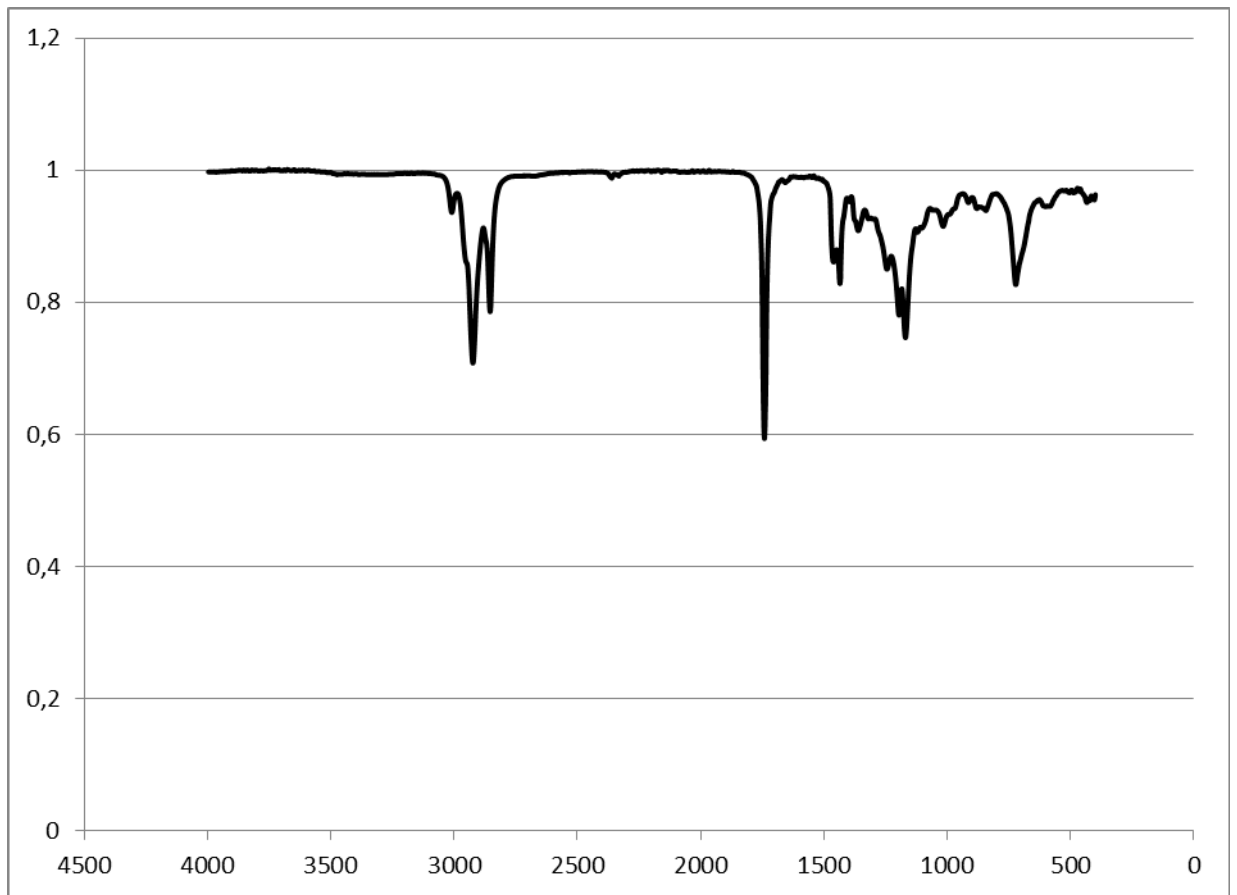

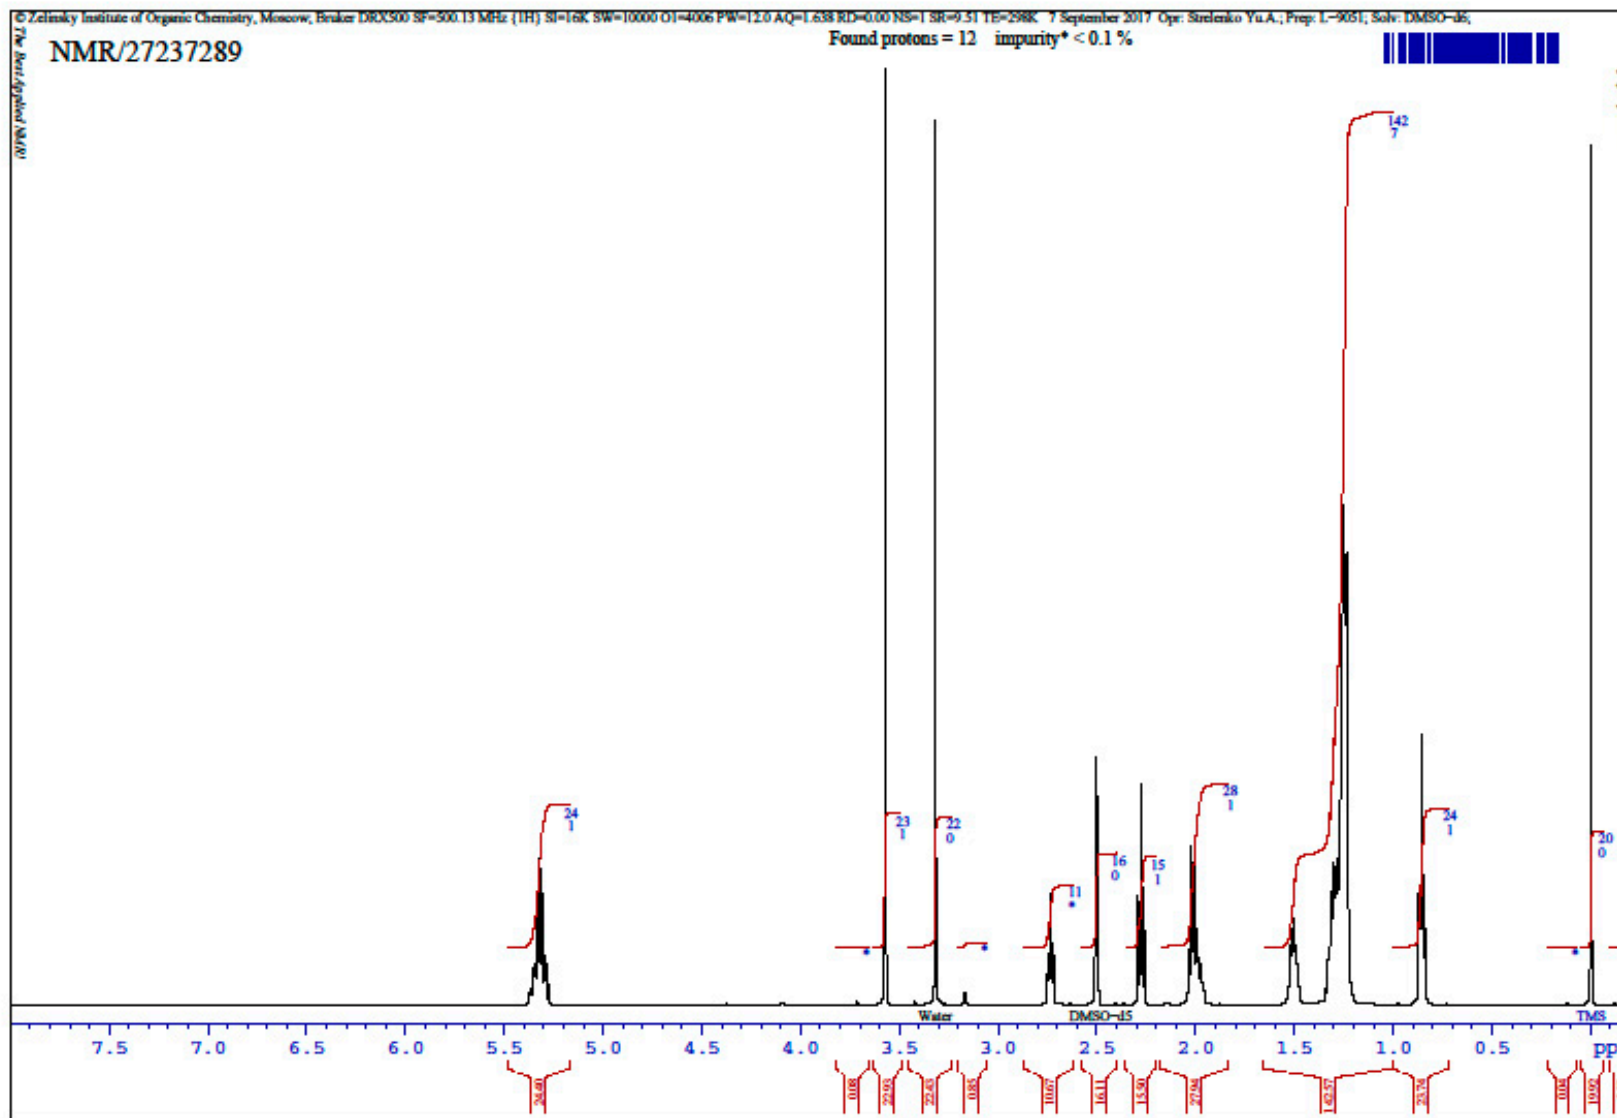

*Soybean oil FAME 12b*

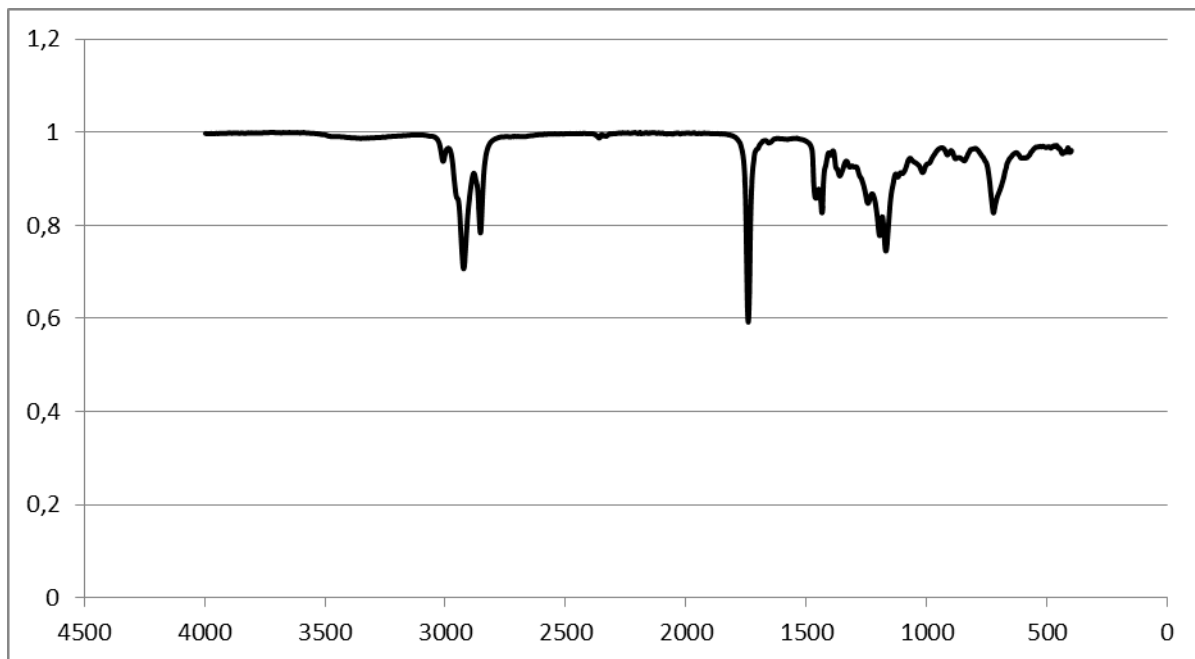

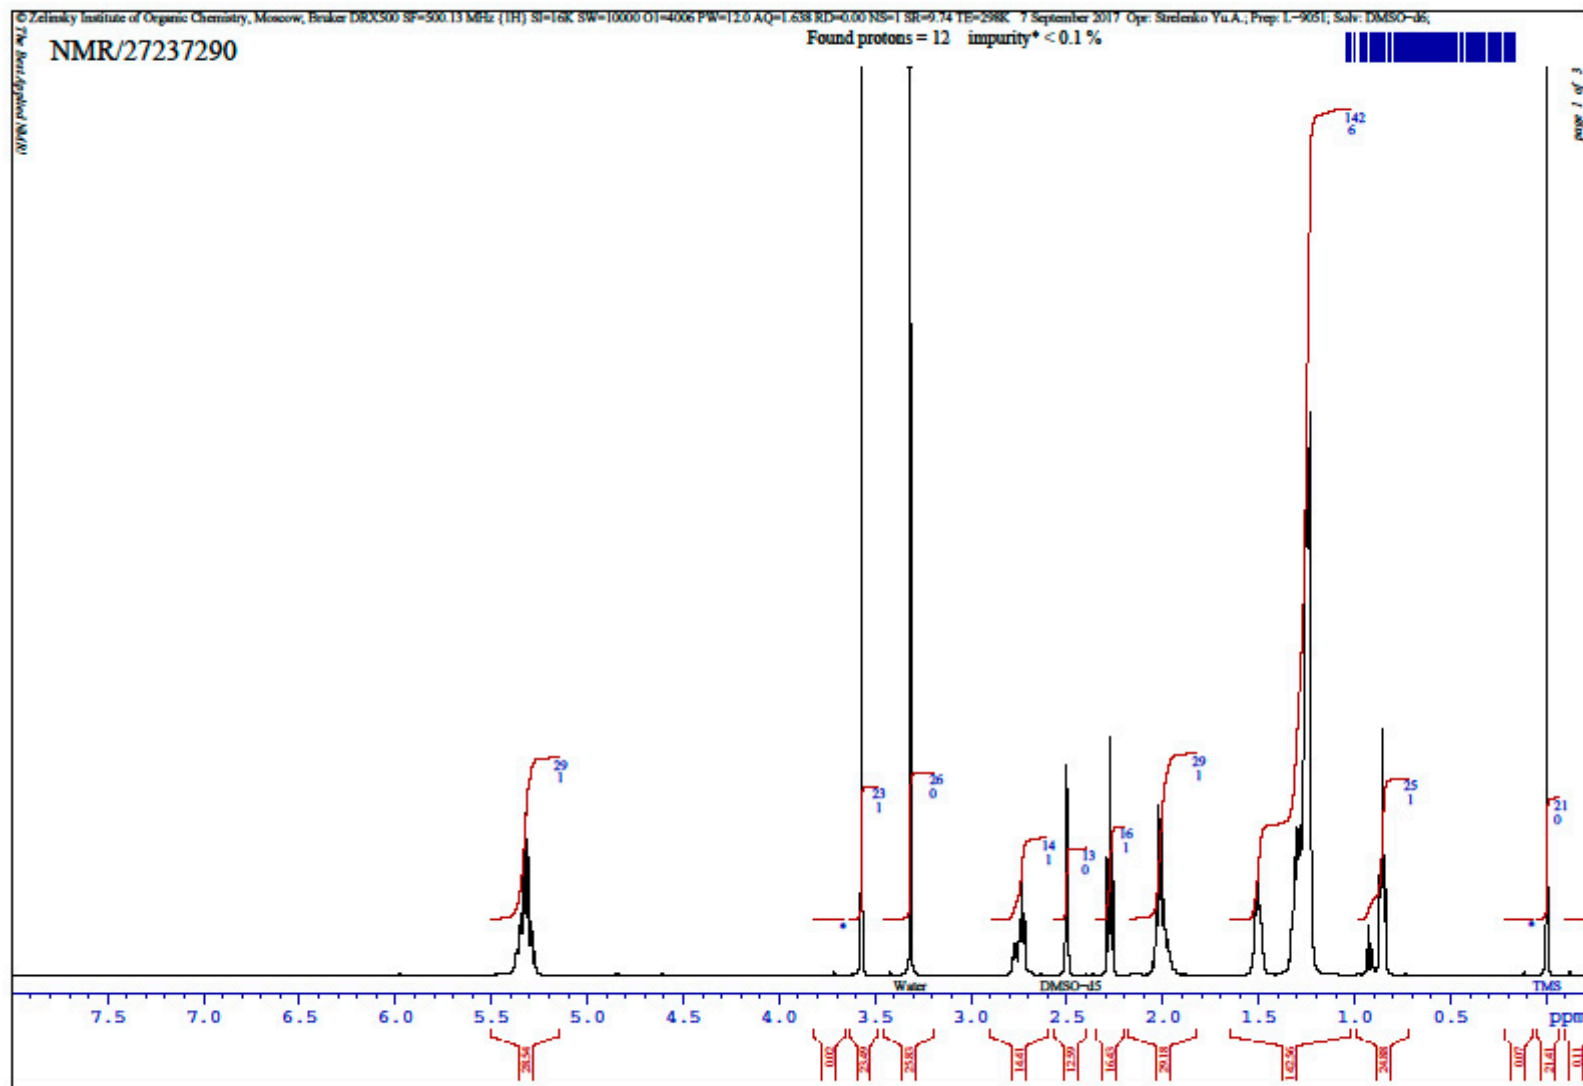

**IR, <sup>1</sup>H NMR spectra and data of GC-MS analysis of epoxidized oils  
and FAME**

*Epoxidized sunflower oil 13a*

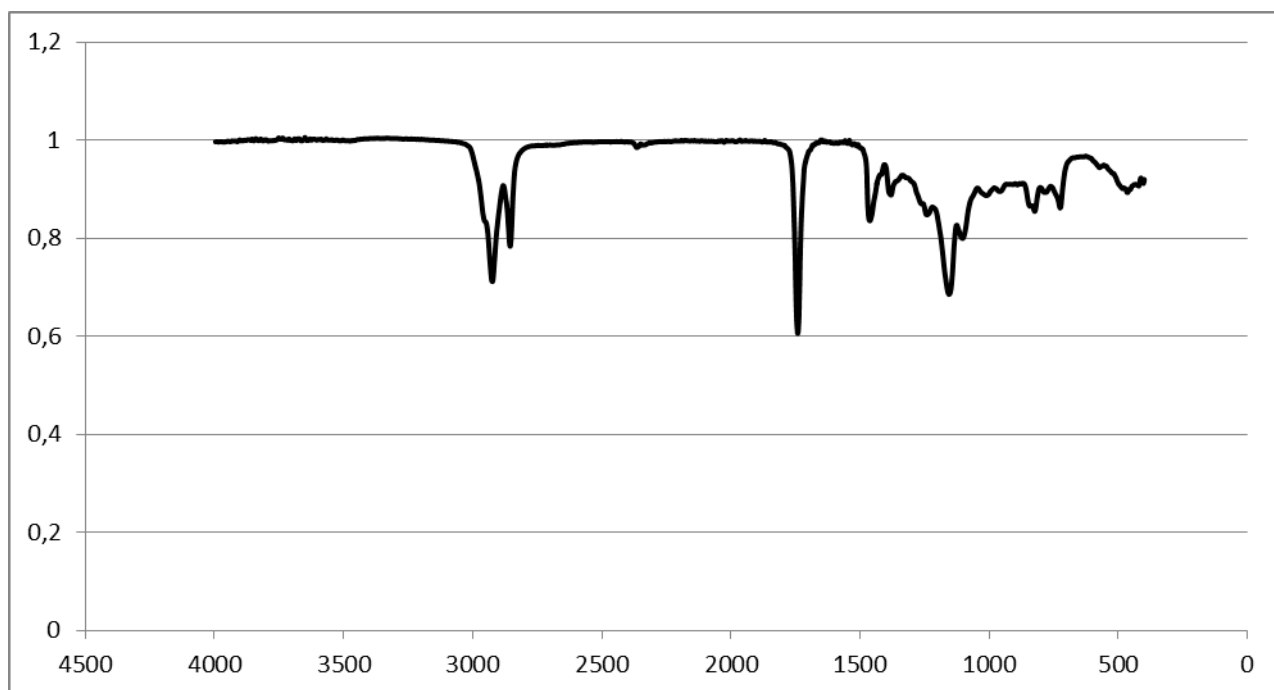

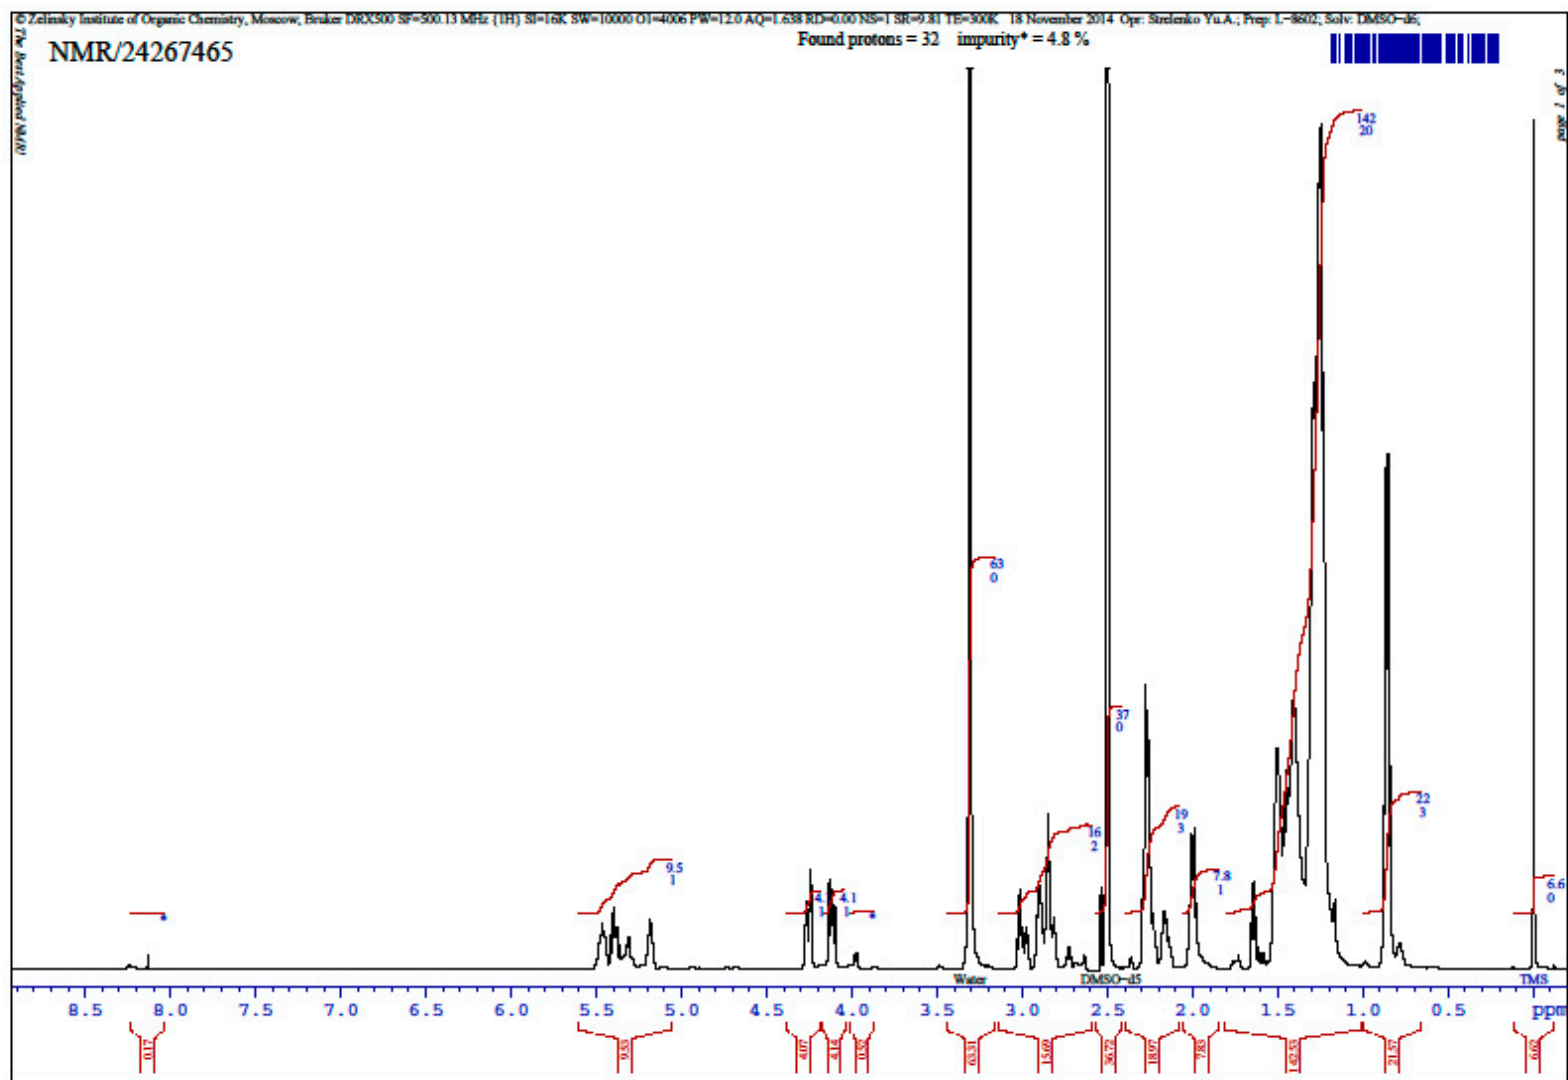

*Epoxidized soybean oil 13b*

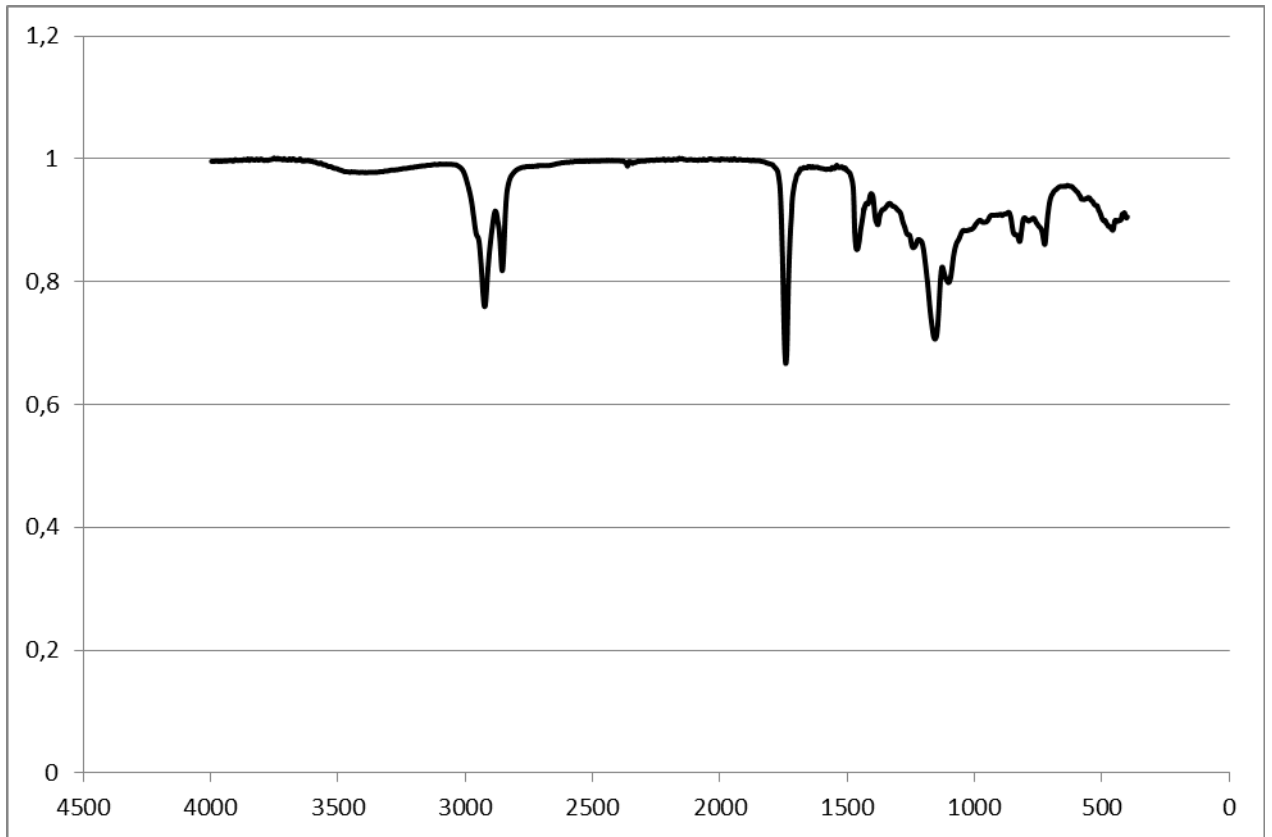

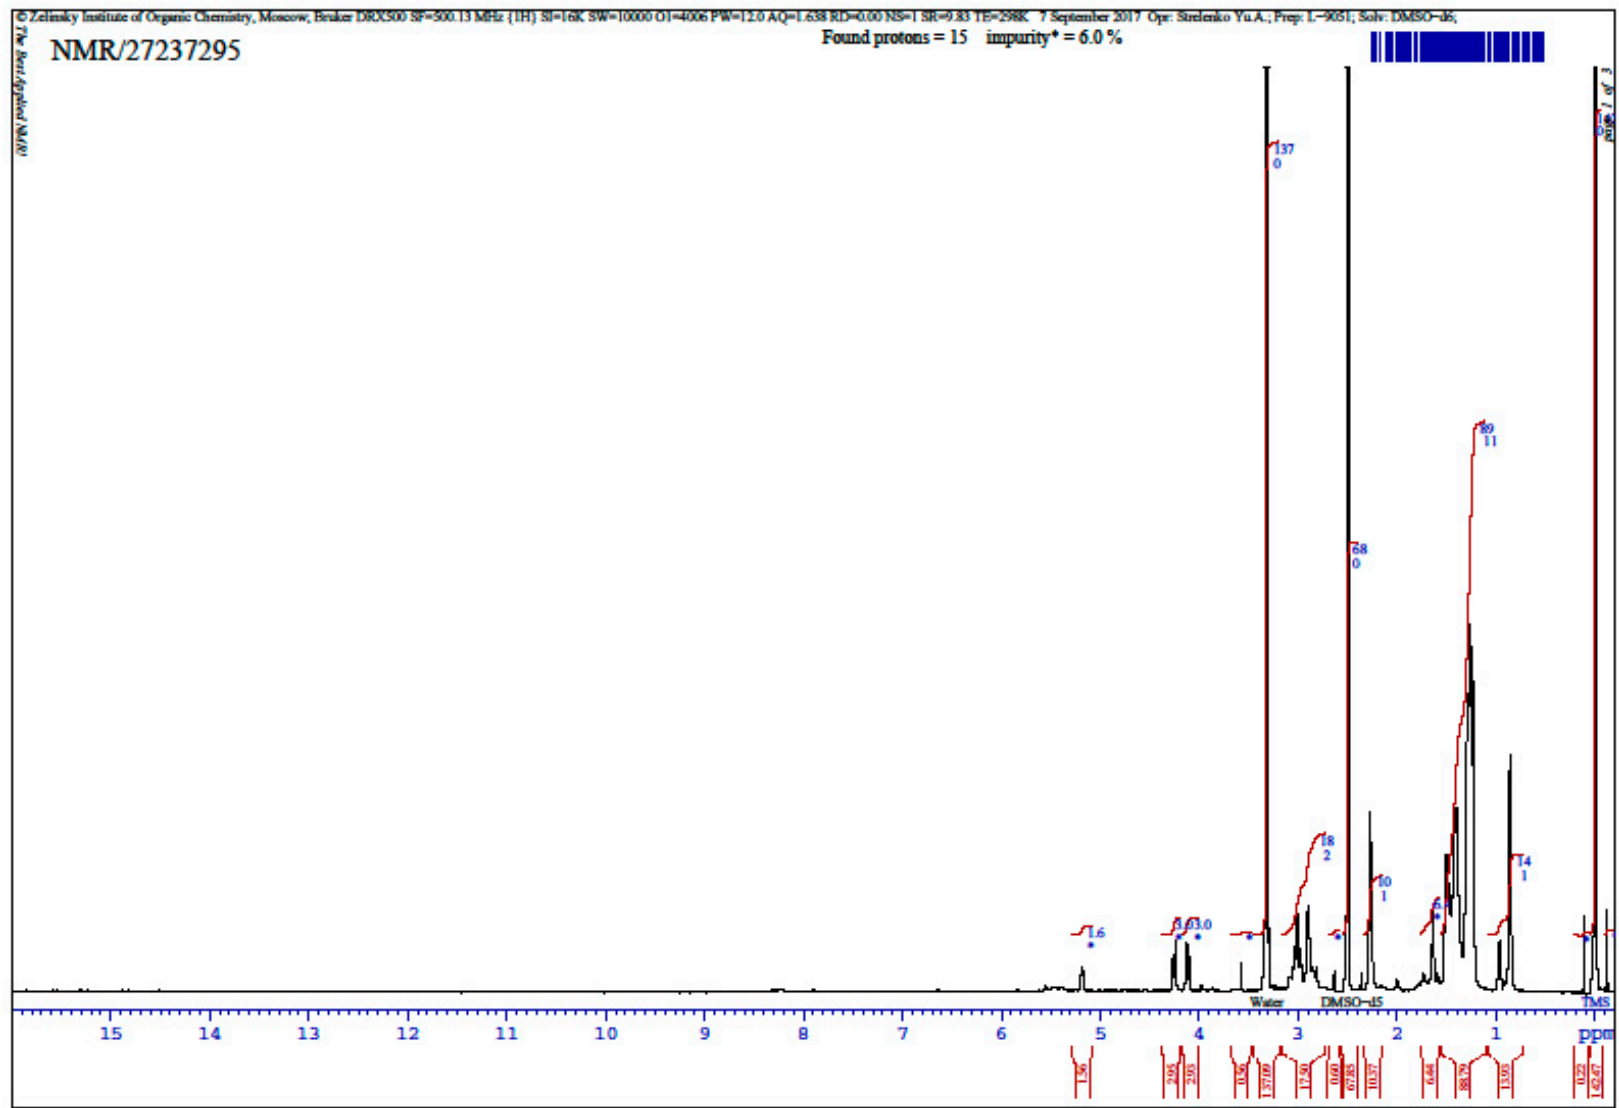

*Epoxidized sunflower oil FAME 14a*

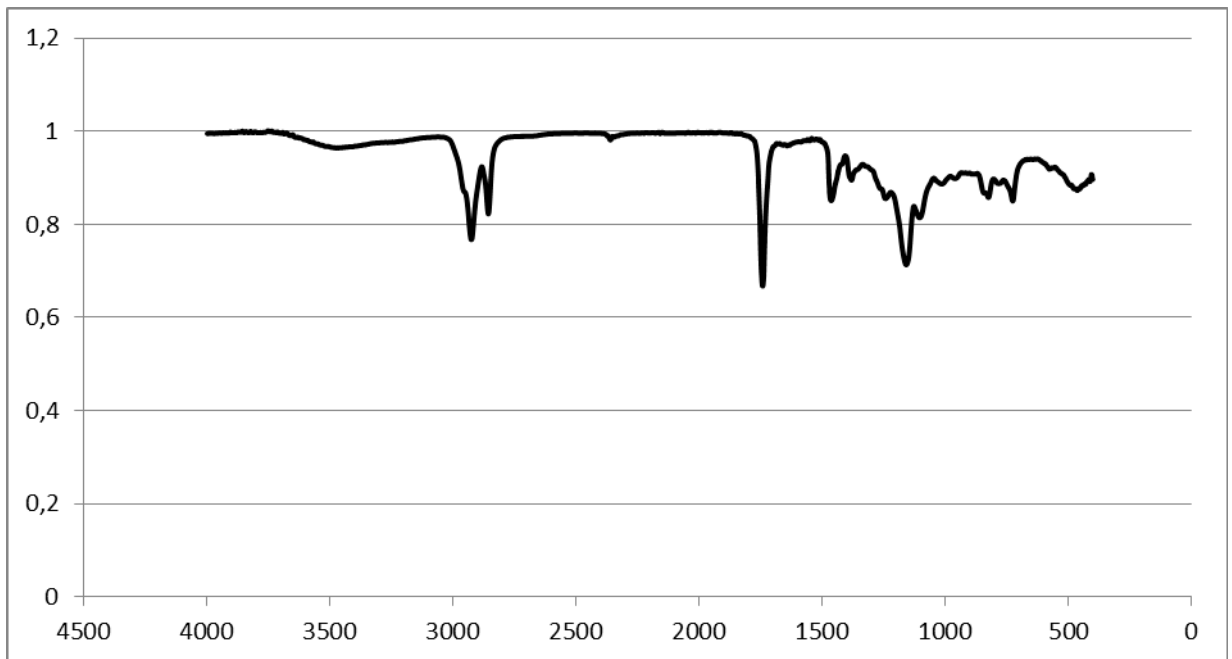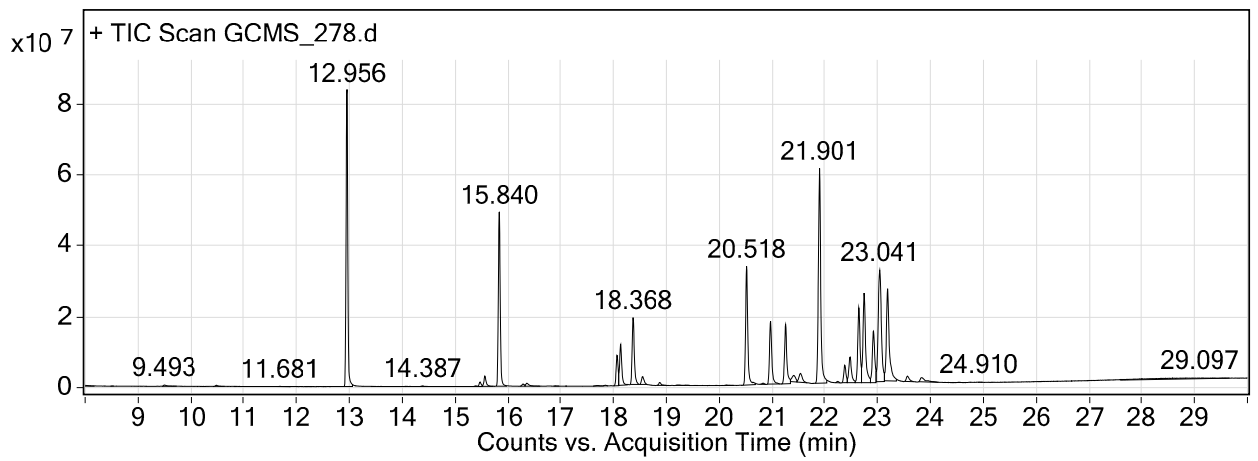

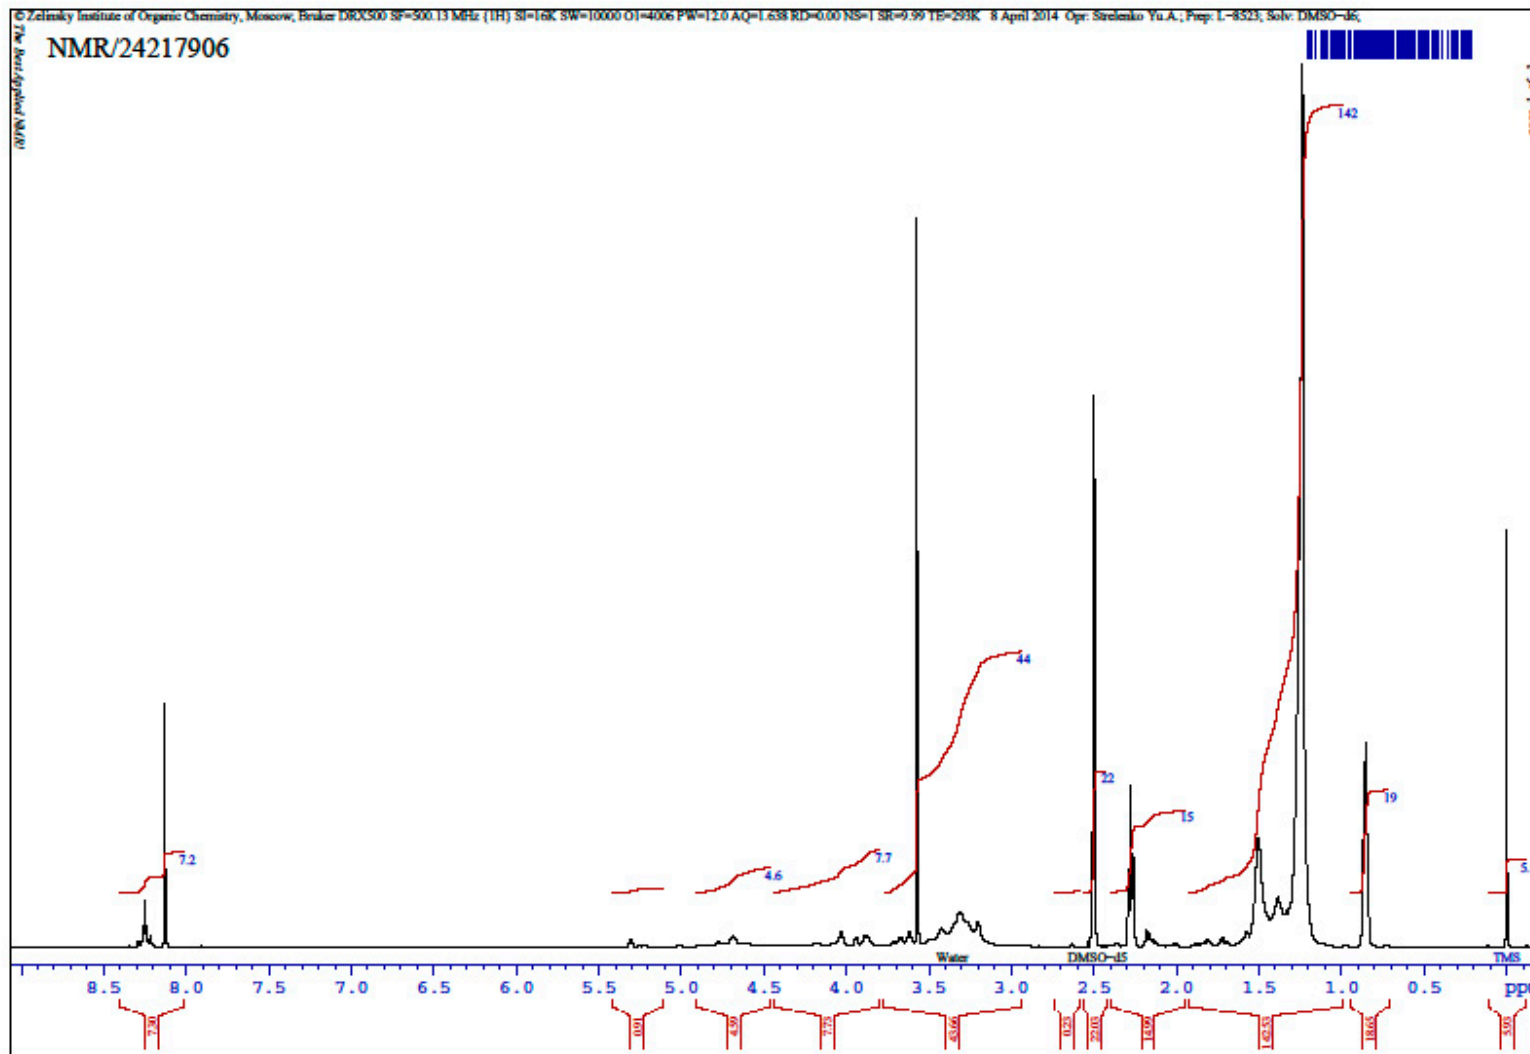

*Epoxidized soybean oil FAME 14b*

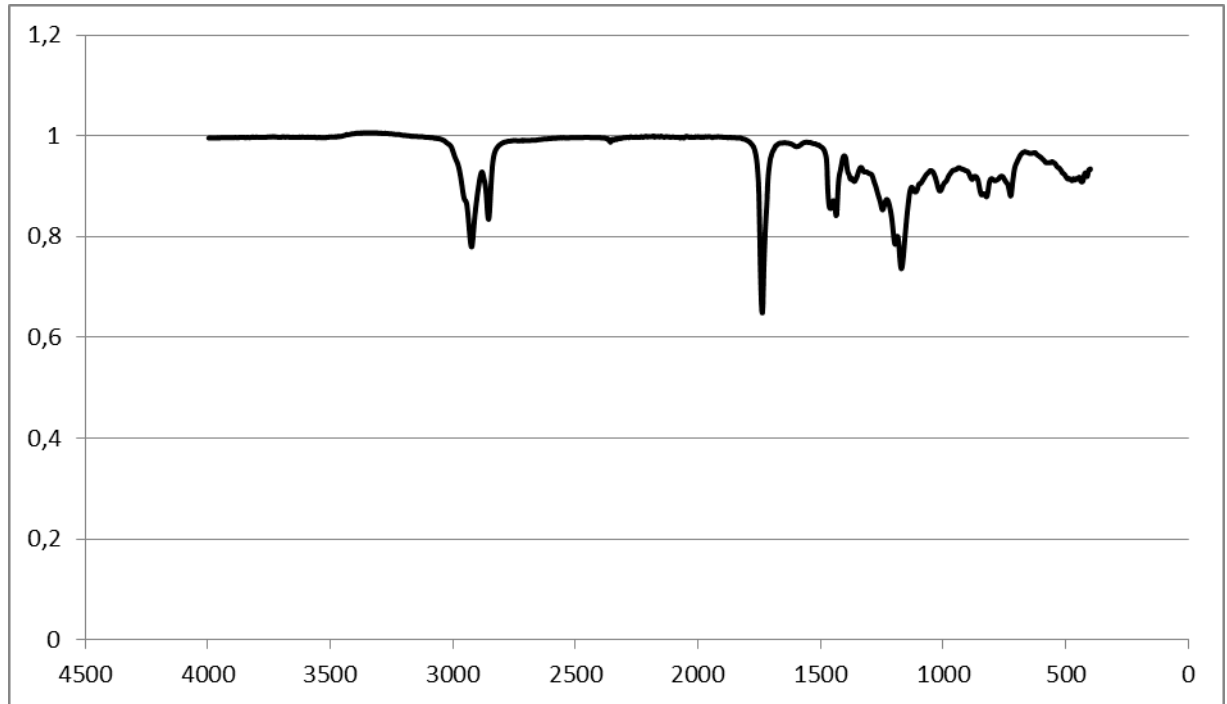

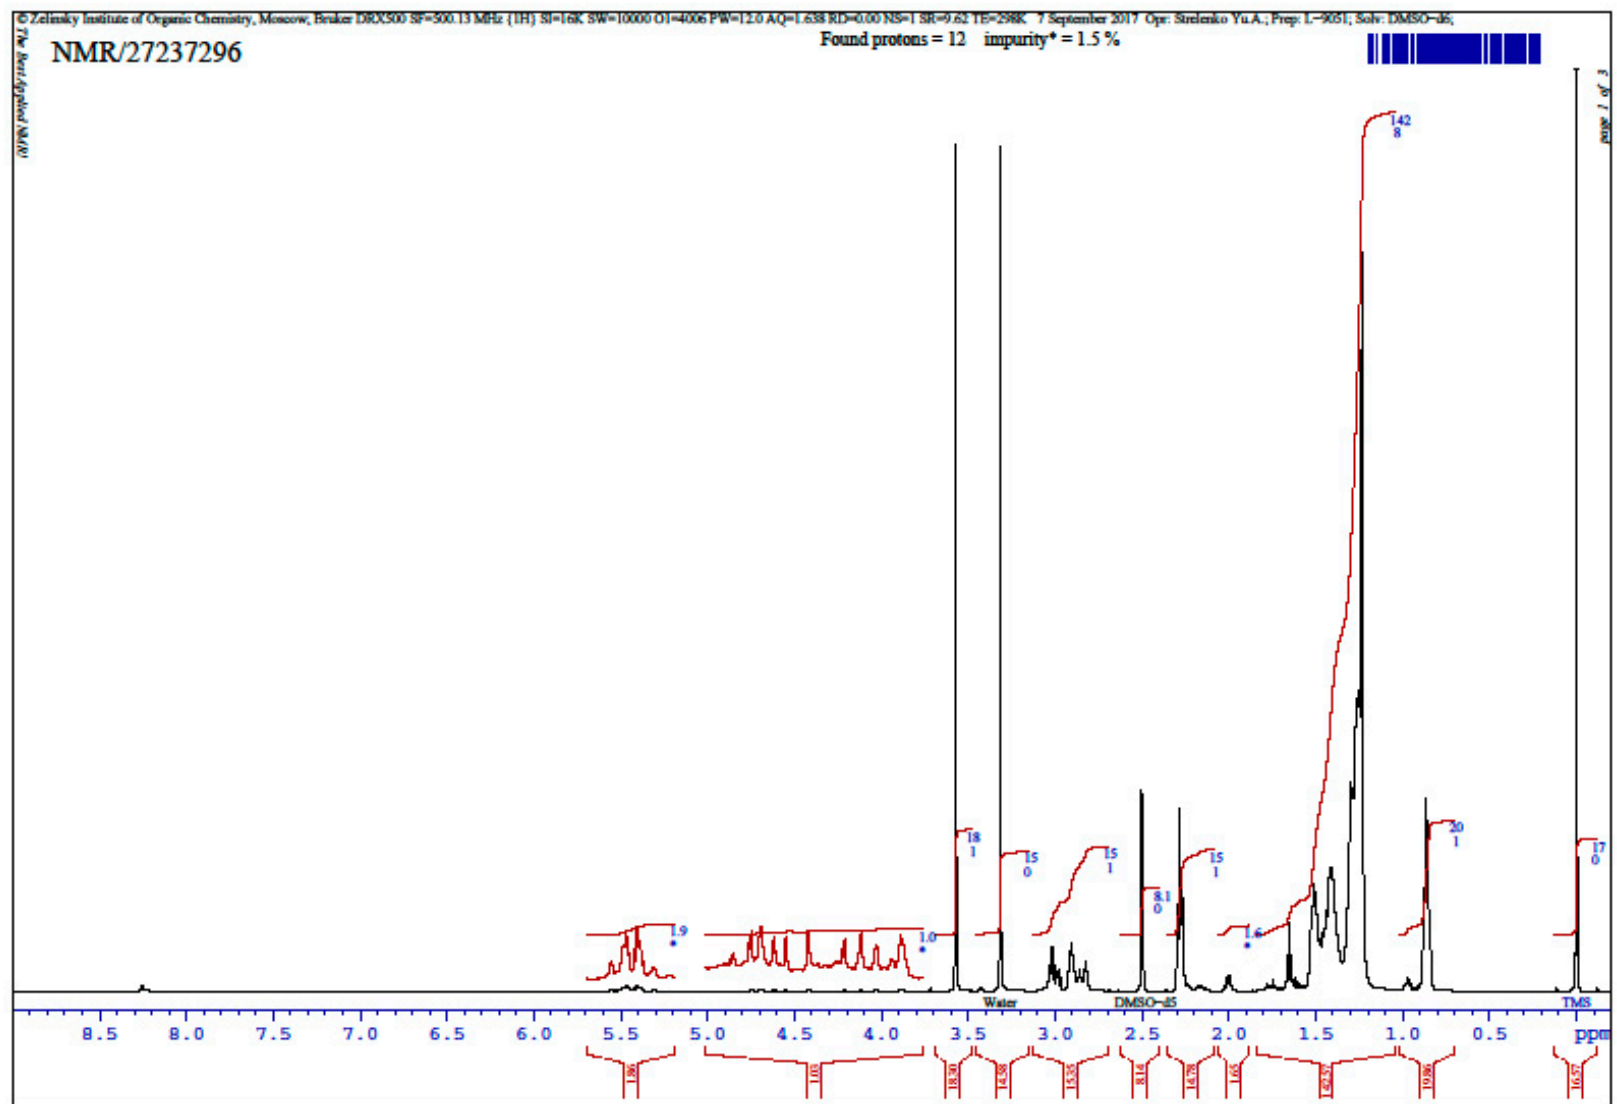

# IR, <sup>1</sup>H NMR spectra and data of HPLC-MS-ESI analysis of esters 15-16

## *Esters 15a (Glycerol + epoxidized sunflower oil)*

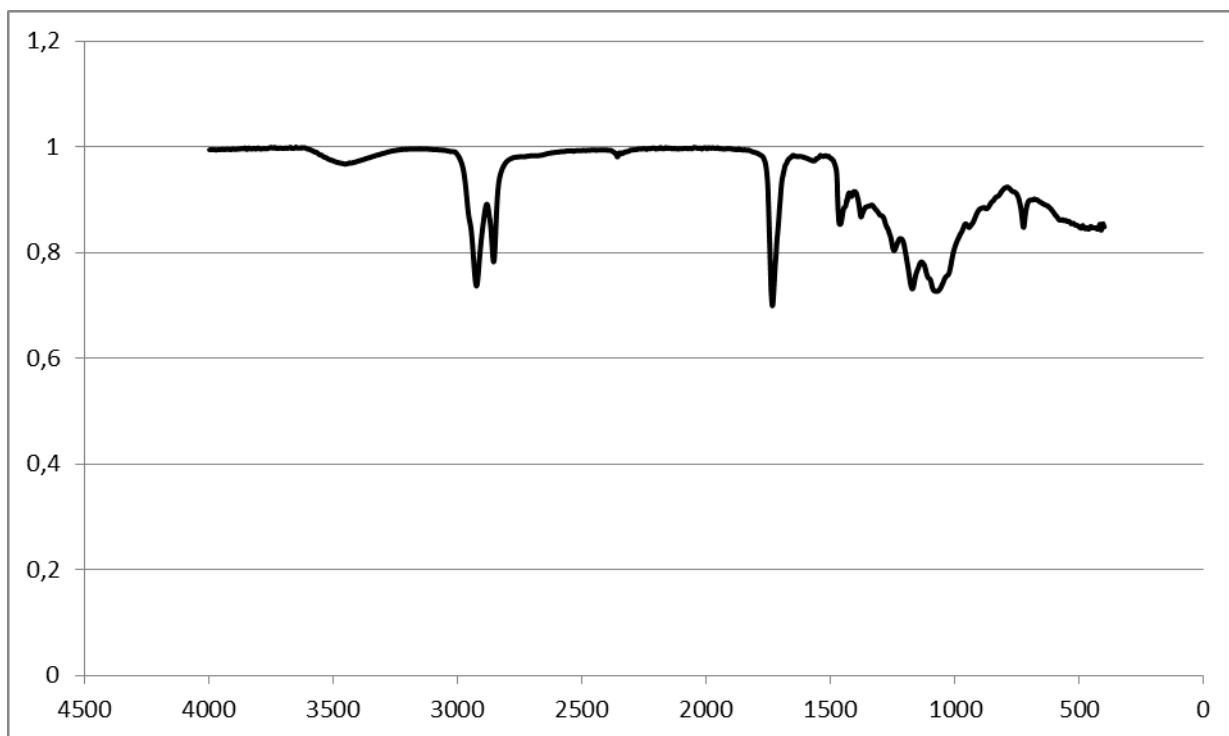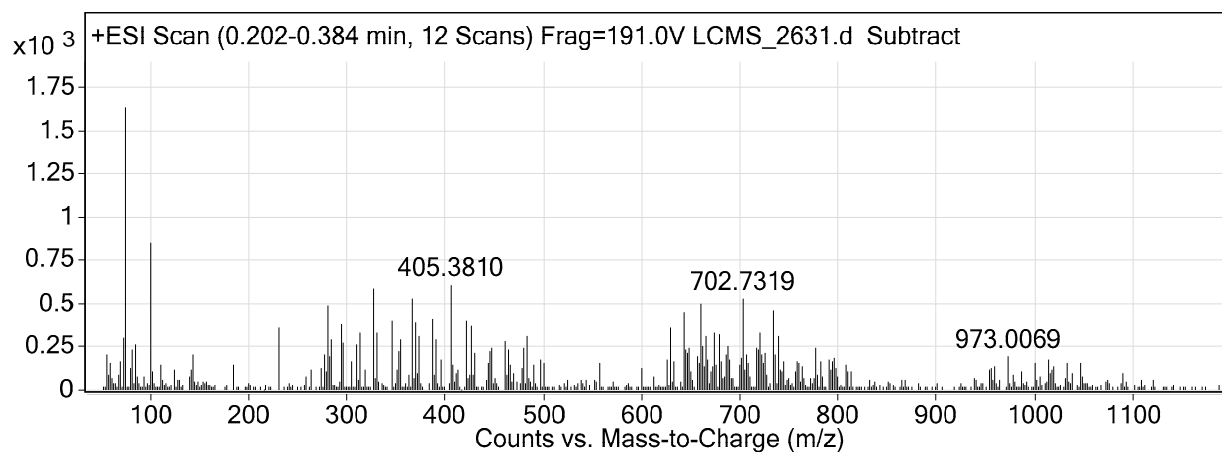

| m/z     | Species | Abund  | Abund % |
|---------|---------|--------|---------|
| 55,0701 |         | 205,66 | 12,59   |
| 59,1176 |         | 140,64 | 8,61    |
| 59,1236 |         | 155,14 | 9,49    |
| 59,1335 |         | 112,72 | 6,9     |
| 59,1444 |         | 119,18 | 7,29    |
| 59,1944 |         | 127,78 | 7,82    |
| 69,0863 |         | 169,63 | 10,38   |
| 70,0801 |         | 110,89 | 6,79    |
| 71,9693 |         | 130,27 | 7,97    |

|          |  |        |       |
|----------|--|--------|-------|
| 72,117   |  | 307,69 | 18,83 |
| 74,0795  |  | 1634   | 100   |
| 74,1324  |  | 659,48 | 40,36 |
| 80,074   |  | 128,59 | 7,87  |
| 81,0912  |  | 235,29 | 14,4  |
| 84,9802  |  | 175,34 | 10,73 |
| 84,9995  |  | 261,83 | 16,02 |
| 100,1566 |  | 849,53 | 51,99 |
| 102,1713 |  | 108,43 | 6,64  |
| 111,1389 |  | 147,4  | 9,02  |
| 125,1349 |  | 117,23 | 7,17  |
| 142,2701 |  | 121,59 | 7,44  |
| 142,4407 |  | 173,74 | 10,63 |
| 142,54   |  | 119,17 | 7,29  |
| 143,0357 |  | 206,07 | 12,61 |
| 185,1606 |  | 146,79 | 8,98  |
| 230,3032 |  | 358,23 | 21,92 |
| 263,2972 |  | 115,61 | 7,08  |
| 274,3367 |  | 127,71 | 7,82  |
| 277,2842 |  | 207,98 | 12,73 |
| 279,2972 |  | 105,68 | 6,47  |
| 281,313  |  | 490,19 | 30    |
| 281,3446 |  | 217,44 | 13,31 |
| 282,3784 |  | 192,68 | 11,79 |
| 284,4315 |  | 292,31 | 17,89 |
| 295,2944 |  | 378,44 | 23,16 |
| 295,3306 |  | 269,45 | 16,49 |
| 304,3688 |  | 166,2  | 10,17 |
| 309,3131 |  | 263,18 | 16,11 |
| 313,3106 |  | 152,29 | 9,32  |
| 313,3453 |  | 328,51 | 20,1  |
| 318,376  |  | 113,69 | 6,96  |
| 327,3311 |  | 588,88 | 36,04 |
| 327,3703 |  | 103,69 | 6,35  |
| 331,3643 |  | 331,86 | 20,31 |
| 345,3464 |  | 403,24 | 24,68 |
| 345,375  |  | 145,91 | 8,93  |
| 351,3386 |  | 118,59 | 7,26  |
| 353,3498 |  | 228,7  | 14    |
| 355,3659 |  | 297,78 | 18,22 |
| 367,3376 |  | 525,73 | 32,17 |
| 369,3509 |  | 395,41 | 24,2  |
| 371,3635 |  | 100,91 | 6,18  |
| 373,3854 |  | 309,87 | 18,96 |
| 373,4298 |  | 110,7  | 6,77  |
| 387,3675 |  | 414,71 | 25,38 |
| 387,3984 |  | 132,22 | 8,09  |
| 390,414  |  | 262,48 | 16,06 |
| 391,402  |  | 292,6  | 17,91 |
| 391,4449 |  | 130,11 | 7,96  |
| 395,3702 |  | 179,69 | 11    |
| 405,381  |  | 609,51 | 37,3  |
| 405,4187 |  | 258,14 | 15,8  |
| 406,3828 |  | 146,35 | 8,96  |

|          |  |        |       |
|----------|--|--------|-------|
| 408,4289 |  | 142,37 | 8,71  |
| 413,3864 |  | 116,33 | 7,12  |
| 422,4129 |  | 397,37 | 24,32 |
| 422,4556 |  | 194,8  | 11,92 |
| 427,3716 |  | 370,67 | 22,68 |
| 427,408  |  | 183,59 | 11,24 |
| 429,4166 |  | 213,81 | 13,09 |
| 443,3963 |  | 123,54 | 7,56  |
| 444,4693 |  | 154,05 | 9,43  |
| 446,4563 |  | 223,57 | 13,68 |
| 447,4431 |  | 240,17 | 14,7  |
| 461,4254 |  | 280,7  | 17,18 |
| 464,4786 |  | 235,28 | 14,4  |
| 465,4653 |  | 150,46 | 9,21  |
| 478,4575 |  | 122,28 | 7,48  |
| 478,4748 |  | 118,77 | 7,27  |
| 479,4481 |  | 239,73 | 14,67 |
| 483,4124 |  | 312,61 | 19,13 |
| 490,5051 |  | 144,04 | 8,82  |
| 496,4787 |  | 177,16 | 10,84 |
| 501,4203 |  | 158,16 | 9,68  |
| 557,4625 |  | 153,15 | 9,37  |
| 600,669  |  | 124,69 | 7,63  |
| 625,6371 |  | 128,92 | 7,89  |
| 626,664  |  | 178,8  | 10,94 |
| 628,6936 |  | 362,5  | 22,18 |
| 629,6897 |  | 161,02 | 9,85  |
| 633,6433 |  | 165,84 | 10,15 |
| 642,6767 |  | 447,14 | 27,36 |
| 643,6717 |  | 375,43 | 22,98 |
| 644,6766 |  | 238,28 | 14,58 |
| 646,7053 |  | 211,35 | 12,93 |
| 647,6411 |  | 242,09 | 14,82 |
| 647,7117 |  | 163,67 | 10,02 |
| 649,6482 |  | 109,35 | 6,69  |
| 657,6572 |  | 196,12 | 12    |
| 658,6858 |  | 154,09 | 9,43  |
| 660,7006 |  | 497,32 | 30,44 |
| 660,7427 |  | 143,25 | 8,77  |
| 661,6979 |  | 254,97 | 15,6  |
| 661,7549 |  | 107,74 | 6,59  |
| 663,6369 |  | 140,13 | 8,58  |
| 665,6563 |  | 314,55 | 19,25 |
| 665,7063 |  | 137,28 | 8,4   |
| 666,664  |  | 171,47 | 10,49 |
| 670,7217 |  | 105,17 | 6,44  |
| 671,7013 |  | 132,31 | 8,1   |
| 674,6834 |  | 329,15 | 20,14 |
| 674,741  |  | 178,25 | 10,91 |
| 675,6858 |  | 115,6  | 7,07  |
| 675,7416 |  | 146,38 | 8,96  |
| 679,6431 |  | 326,42 | 19,98 |
| 680,6434 |  | 166,23 | 10,17 |
| 681,6789 |  | 100,99 | 6,18  |

|          |  |        |       |
|----------|--|--------|-------|
| 685,6885 |  | 178,34 | 10,91 |
| 686,7059 |  | 209,01 | 12,79 |
| 688,7365 |  | 258,57 | 15,82 |
| 689,7335 |  | 178,92 | 10,95 |
| 700,7126 |  | 149,71 | 9,16  |
| 701,7059 |  | 181,1  | 11,08 |
| 702,7319 |  | 529,03 | 32,38 |
| 703,729  |  | 369,9  | 22,64 |
| 704,715  |  | 118,44 | 7,25  |
| 707,677  |  | 209,45 | 12,82 |
| 707,7217 |  | 158,29 | 9,69  |
| 708,6892 |  | 146,76 | 8,98  |
| 716,7202 |  | 187,46 | 11,47 |
| 716,7695 |  | 146,05 | 8,94  |
| 717,6995 |  | 241,53 | 14,78 |
| 717,7372 |  | 124,39 | 7,61  |
| 718,7153 |  | 231,77 | 14,18 |
| 720,7375 |  | 330,37 | 20,22 |
| 720,7754 |  | 111,11 | 6,8   |
| 721,6848 |  | 129,66 | 7,93  |
| 721,7327 |  | 203,03 | 12,43 |
| 723,6858 |  | 143,61 | 8,79  |
| 724,779  |  | 152,24 | 9,32  |
| 725,703  |  | 218,9  | 13,4  |
| 734,7339 |  | 463,91 | 28,39 |
| 735,7204 |  | 201,75 | 12,35 |
| 739,6898 |  | 313,28 | 19,17 |
| 740,6934 |  | 112,92 | 6,91  |
| 742,789  |  | 109,03 | 6,67  |
| 744,7761 |  | 161,29 | 9,87  |
| 756,7959 |  | 102,71 | 6,29  |
| 758,7517 |  | 165,43 | 10,12 |
| 759,7569 |  | 154,91 | 9,48  |
| 760,7674 |  | 139,85 | 8,56  |
| 762,793  |  | 126,5  | 7,74  |
| 763,774  |  | 136,07 | 8,33  |
| 776,785  |  | 241,61 | 14,79 |
| 777,7965 |  | 131,26 | 8,03  |
| 781,745  |  | 167,85 | 10,27 |
| 790,765  |  | 177,14 | 10,84 |
| 790,819  |  | 133,13 | 8,15  |
| 791,7482 |  | 110,99 | 6,79  |
| 791,7942 |  | 133,26 | 8,16  |
| 792,7848 |  | 112,97 | 6,91  |
| 794,7972 |  | 168,48 | 10,31 |
| 795,7258 |  | 187,92 | 11,5  |
| 795,797  |  | 117,8  | 7,21  |
| 797,7546 |  | 125,35 | 7,67  |
| 808,7818 |  | 143,91 | 8,81  |
| 808,8375 |  | 131,34 | 8,04  |
| 809,7999 |  | 110,16 | 6,74  |
| 813,7337 |  | 105,64 | 6,47  |
| 954,9882 |  | 119,25 | 7,3   |
| 955,966  |  | 125,38 | 7,67  |

|           |  |        |       |
|-----------|--|--------|-------|
| 959,0009  |  | 132,56 | 8,11  |
| 973,0069  |  | 193,57 | 11,85 |
| 973,9955  |  | 100,74 | 6,16  |
| 986,9792  |  | 105,06 | 6,43  |
| 1001,0397 |  | 156,33 | 9,57  |
| 1015,0232 |  | 178,99 | 10,95 |
| 1016,0353 |  | 100,65 | 6,16  |
| 1017,0352 |  | 115,38 | 7,06  |
| 1020,0038 |  | 141,57 | 8,66  |
| 1033,0521 |  | 153,33 | 9,38  |
| 1034,0335 |  | 101,09 | 6,19  |
| 1038,013  |  | 101,12 | 6,19  |
| 1047,038  |  | 157,21 | 9,62  |

This report was created by ACD/NMR Processor Academic Edition. For more information go to [www.acdlabs.com/nmrproc/](http://www.acdlabs.com/nmrproc/)

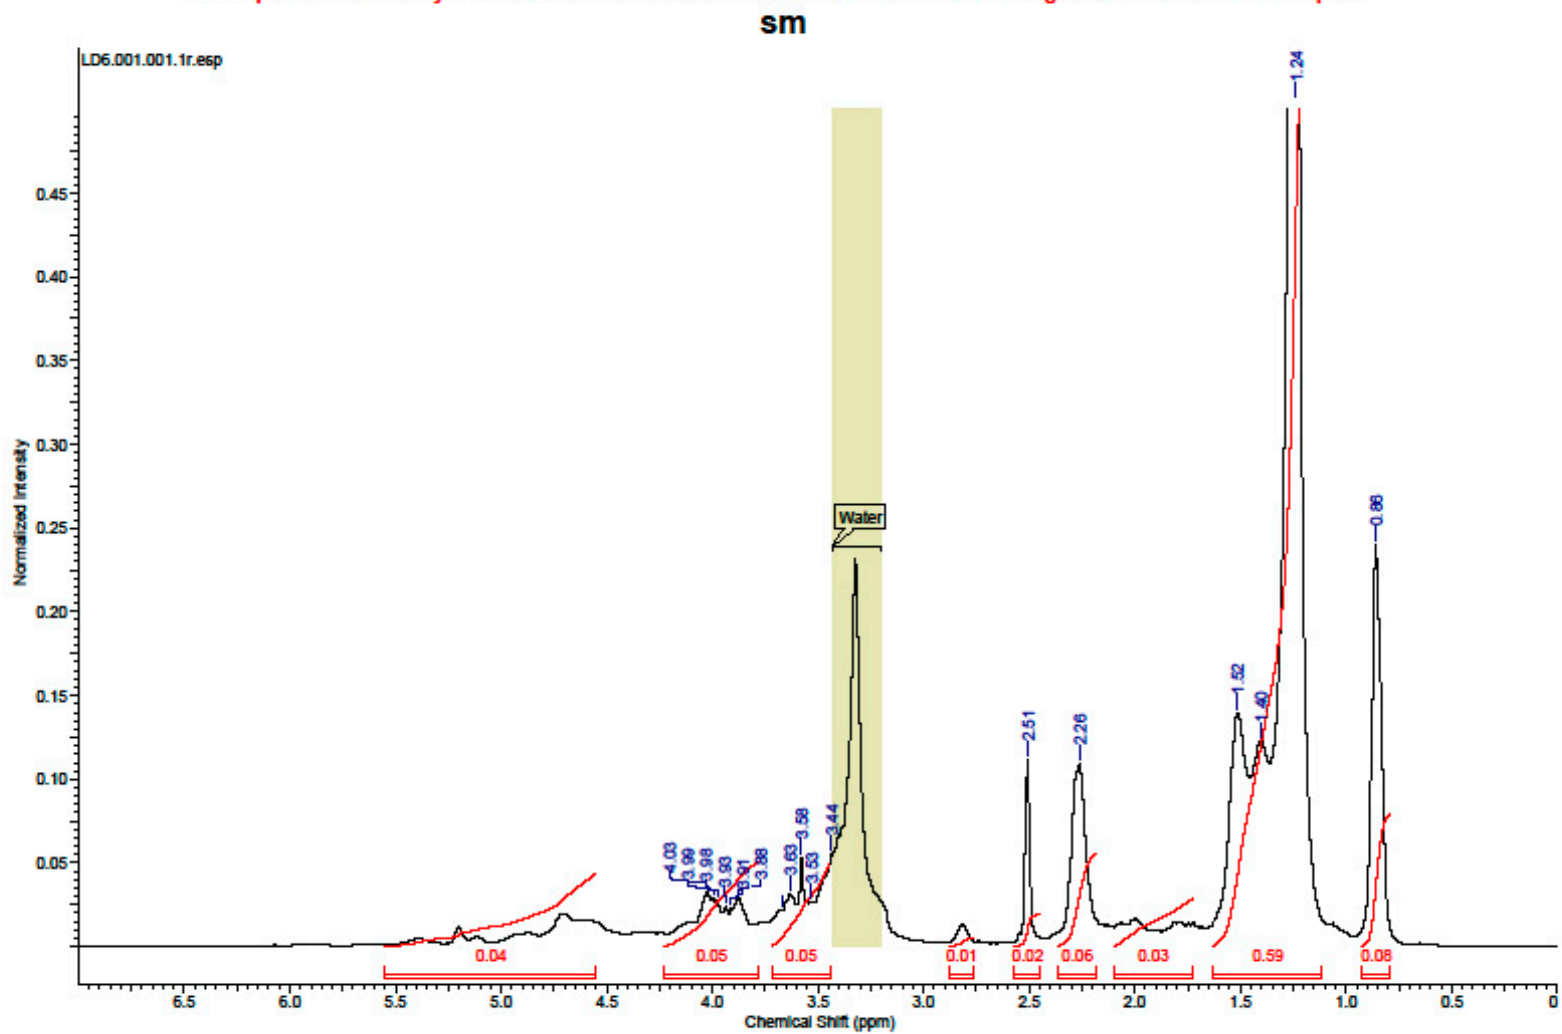

*Esters 15b (Glycerol + epoxidized soybean oil)*

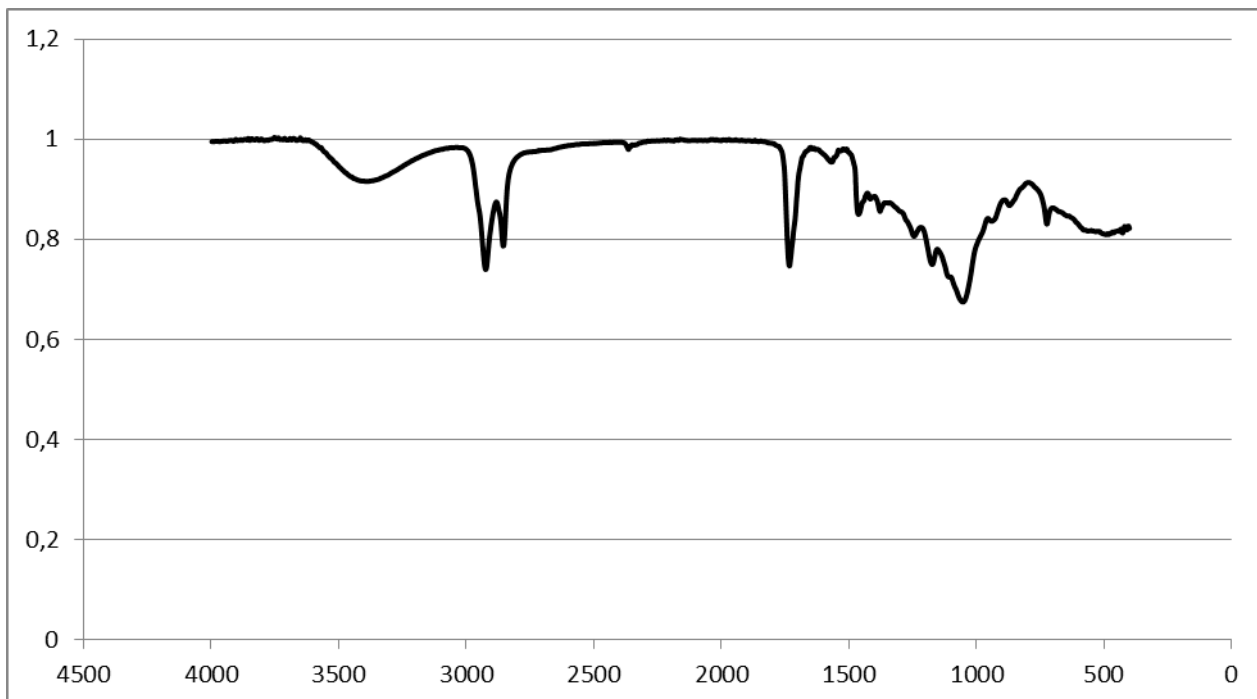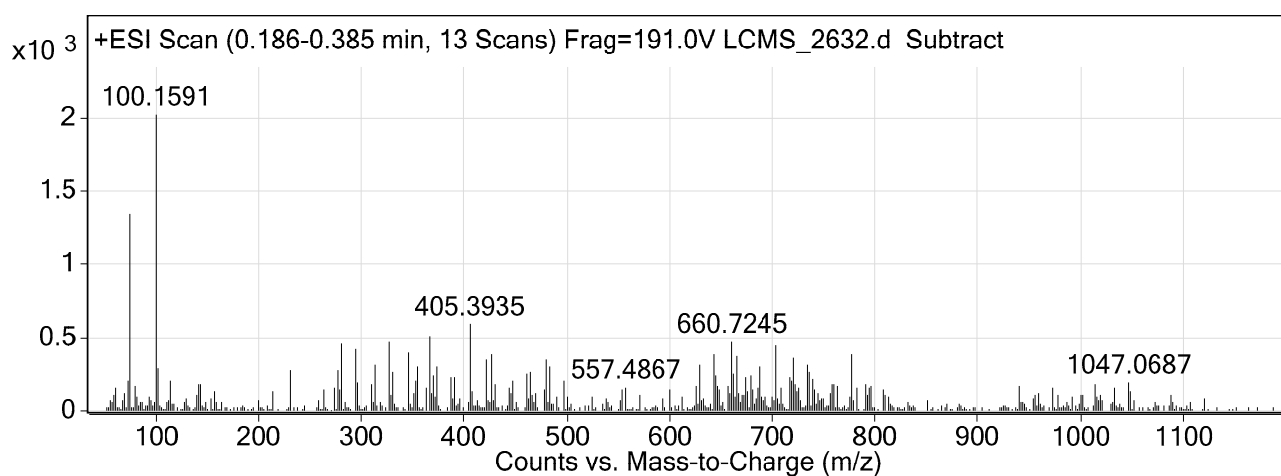

| m/z     | Species | Abund  | Abund % |
|---------|---------|--------|---------|
| 58,0233 |         | 124,73 | 18,63   |
| 59,0574 |         | 162,16 | 24,22   |
| 59,0843 |         | 212,92 | 31,81   |
| 59,1012 |         | 141,11 | 21,08   |
| 59,9911 |         | 111,96 | 16,73   |
| 60,0066 |         | 162,46 | 24,27   |
| 73,0115 |         | 108,48 | 16,21   |
| 75,0518 |         | 127,22 | 19      |
| 75,1014 |         | 110,63 | 16,53   |
| 75,1192 |         | 117,39 | 17,54   |
| 75,1772 |         | 112,89 | 16,86   |

|          |  |        |       |
|----------|--|--------|-------|
| 75,9903  |  | 107,95 | 16,13 |
| 79,9684  |  | 121,15 | 18,1  |
| 81,0059  |  | 156,81 | 23,43 |
| 82,9712  |  | 466,22 | 69,65 |
| 82,987   |  | 585,45 | 87,46 |
| 83,0055  |  | 106,26 | 15,87 |
| 84,8771  |  | 145,75 | 21,77 |
| 89,0214  |  | 103,33 | 15,44 |
| 100,9996 |  | 174,85 | 26,12 |
| 106,9858 |  | 139,29 | 20,81 |
| 112,0142 |  | 119,24 | 17,81 |
| 112,0259 |  | 117,98 | 17,63 |
| 129,023  |  | 118,88 | 17,76 |
| 142,8655 |  | 177,67 | 26,54 |
| 148,9009 |  | 108,48 | 16,21 |
| 199,0011 |  | 197,54 | 29,51 |
| 200,8742 |  | 122,13 | 18,25 |
| 215,8317 |  | 214,15 | 31,99 |
| 218,833  |  | 102,57 | 15,32 |
| 246,8385 |  | 181,82 | 27,16 |
| 246,8703 |  | 129,35 | 19,32 |
| 262,9782 |  | 102,62 | 15,33 |
| 276,9432 |  | 150,96 | 22,55 |
| 280,9812 |  | 151,81 | 22,68 |
| 284,0817 |  | 102,07 | 15,25 |
| 294,9352 |  | 208,8  | 31,19 |
| 304,0313 |  | 120,66 | 18,03 |
| 304,8291 |  | 133,86 | 20    |
| 305,0367 |  | 102,15 | 15,26 |
| 312,9189 |  | 150,6  | 22,5  |
| 312,953  |  | 157,94 | 23,59 |
| 325,975  |  | 188,19 | 28,11 |
| 330,9057 |  | 115,72 | 17,29 |
| 332,0338 |  | 202,5  | 30,25 |
| 352,9066 |  | 114,24 | 17,07 |
| 354,9261 |  | 133,3  | 19,91 |
| 354,9889 |  | 105    | 15,69 |
| 368,8936 |  | 117,36 | 17,53 |
| 372,9284 |  | 209,11 | 31,24 |
| 386,8876 |  | 323,86 | 48,38 |
| 386,919  |  | 198,43 | 29,64 |
| 390,9028 |  | 133,94 | 20,01 |
| 404,8856 |  | 669,39 | 100   |
| 404,9206 |  | 202,36 | 30,23 |
| 407,9252 |  | 126,19 | 18,85 |
| 412,8657 |  | 183,79 | 27,46 |
| 421,8882 |  | 151,97 | 22,7  |
| 421,9214 |  | 301,7  | 45,07 |
| 426,855  |  | 385,35 | 57,57 |
| 460,857  |  | 160,9  | 24,04 |
| 464,9037 |  | 175,29 | 26,19 |
| 478,8552 |  | 266,57 | 39,82 |
| 486,8487 |  | 126,17 | 18,85 |
| 495,86   |  | 207,51 | 31    |

|          |  |        |       |
|----------|--|--------|-------|
| 495,9079 |  | 167,4  | 25,01 |
| 500,8026 |  | 173,1  | 25,86 |
| 500,8355 |  | 111,57 | 16,67 |
| 552,8112 |  | 112,9  | 16,87 |
| 589,879  |  | 125,25 | 18,71 |
| 599,8693 |  | 139,97 | 20,91 |
| 642,8601 |  | 248,35 | 37,1  |
| 643,8595 |  | 159,84 | 23,88 |
| 643,892  |  | 105,87 | 15,82 |
| 659,8894 |  | 366,56 | 54,76 |
| 660,8674 |  | 141,24 | 21,1  |
| 661,8312 |  | 100,14 | 14,96 |
| 664,8322 |  | 191,32 | 28,58 |
| 673,8627 |  | 165,01 | 24,65 |
| 687,8637 |  | 170,41 | 25,46 |
| 700,8732 |  | 129,84 | 19,4  |
| 701,1917 |  | 100,01 | 14,94 |
| 702,8343 |  | 362,41 | 54,14 |
| 703,8487 |  | 193,17 | 28,86 |
| 708,8219 |  | 159,98 | 23,9  |
| 714,825  |  | 163,81 | 24,47 |
| 715,8357 |  | 121,53 | 18,16 |
| 716,8093 |  | 231,25 | 34,55 |
| 717,8172 |  | 221,85 | 33,14 |
| 719,8337 |  | 159,01 | 23,75 |
| 719,8992 |  | 128,19 | 19,15 |
| 720,8537 |  | 167,09 | 24,96 |
| 723,7831 |  | 110,02 | 16,44 |
| 724,8109 |  | 216,89 | 32,4  |
| 725,8216 |  | 111,92 | 16,72 |
| 726,8269 |  | 148,31 | 22,16 |
| 733,8325 |  | 442,22 | 66,06 |
| 733,902  |  | 104,12 | 15,55 |
| 734,7877 |  | 109,69 | 16,39 |
| 734,8336 |  | 150,39 | 22,47 |
| 738,7851 |  | 230,63 | 34,45 |
| 739,8027 |  | 231,2  | 34,54 |
| 747,8629 |  | 103,84 | 15,51 |
| 751,7984 |  | 138,98 | 20,76 |
| 752,8001 |  | 139,79 | 20,88 |
| 754,7607 |  | 103,57 | 15,47 |
| 758,8687 |  | 136,93 | 20,46 |
| 761,8314 |  | 119,73 | 17,89 |
| 776,8094 |  | 157,33 | 23,5  |
| 779,4432 |  | 136,08 | 20,33 |
| 780,8727 |  | 114,66 | 17,13 |
| 781,8084 |  | 158,25 | 23,64 |
| 783,2739 |  | 116,13 | 17,35 |
| 790,828  |  | 119,26 | 17,82 |
| 791,7946 |  | 266,88 | 39,87 |
| 792,7725 |  | 107,27 | 16,03 |
| 793,7819 |  | 126,25 | 18,86 |
| 793,8383 |  | 101,53 | 15,17 |
| 797,4744 |  | 100,25 | 14,98 |

|           |  |        |       |
|-----------|--|--------|-------|
| 807,7892  |  | 116,93 | 17,47 |
| 808,7848  |  | 154,02 | 23,01 |
| 812,769   |  | 111,64 | 16,68 |
| 813,7711  |  | 132,84 | 19,85 |
| 816,8634  |  | 121,93 | 18,22 |
| 835,8298  |  | 118,99 | 17,78 |
| 836,841   |  | 112,08 | 16,74 |
| 839,3564  |  | 183,1  | 27,35 |
| 855,8277  |  | 105,1  | 15,7  |
| 856,7571  |  | 138,98 | 20,76 |
| 868,3578  |  | 153,17 | 22,88 |
| 868,7866  |  | 116,57 | 17,41 |
| 896,8235  |  | 321,38 | 48,01 |
| 897,8398  |  | 356,47 | 53,25 |
| 898,7829  |  | 141,17 | 21,09 |
| 899,8     |  | 127,79 | 19,09 |
| 900,7539  |  | 163,84 | 24,48 |
| 926,2794  |  | 236,29 | 35,3  |
| 930,697   |  | 122,74 | 18,34 |
| 935,8065  |  | 126,45 | 18,89 |
| 937,7705  |  | 124,58 | 18,61 |
| 946,7403  |  | 262,31 | 39,19 |
| 954,8388  |  | 307,39 | 45,92 |
| 955,7735  |  | 266,68 | 39,84 |
| 956,3318  |  | 160,66 | 24    |
| 957,7477  |  | 211,91 | 31,66 |
| 958,6929  |  | 123,62 | 18,47 |
| 959,7476  |  | 217,22 | 32,45 |
| 960,7482  |  | 101,73 | 15,2  |
| 971,7974  |  | 121,75 | 18,19 |
| 977,8051  |  | 198,69 | 29,68 |
| 989,2012  |  | 107,09 | 16    |
| 989,7032  |  | 116,76 | 17,44 |
| 1012,8047 |  | 428,01 | 63,94 |
| 1013,42   |  | 195,04 | 29,14 |
| 1014,5449 |  | 121,83 | 18,2  |
| 1016,8718 |  | 100,72 | 15,05 |
| 1017,7514 |  | 218,6  | 32,66 |
| 1018,7809 |  | 115,89 | 17,31 |
| 1021,7326 |  | 103,17 | 15,41 |
| 1029,7645 |  | 159,52 | 23,83 |
| 1031,7458 |  | 104,58 | 15,62 |
| 1032,7545 |  | 137,85 | 20,59 |
| 1041,8047 |  | 134,64 | 20,11 |
| 1042,3988 |  | 115,03 | 17,18 |
| 1043,3066 |  | 123,14 | 18,4  |
| 1045,7583 |  | 199,91 | 29,86 |
| 1047,6953 |  | 193,18 | 28,86 |
| 1070,7389 |  | 104,03 | 15,54 |
| 1071,7418 |  | 115,54 | 17,26 |
| 1072,7293 |  | 129,96 | 19,42 |
| 1073,2347 |  | 159,41 | 23,81 |
| 1074,7781 |  | 137,67 | 20,57 |
| 1075,2488 |  | 117,64 | 17,57 |

|           |  |        |       |
|-----------|--|--------|-------|
| 1075,7846 |  | 107,2  | 16,02 |
| 1076,7457 |  | 154,06 | 23,02 |
| 1081,6731 |  | 112,04 | 16,74 |
| 1099,784  |  | 421,16 | 62,92 |
| 1099,8533 |  | 117,37 | 17,53 |
| 1101,7184 |  | 136,64 | 20,41 |
| 1102,2925 |  | 185,29 | 27,68 |
| 1102,7034 |  | 137,63 | 20,56 |
| 1102,8369 |  | 126,99 | 18,97 |
| 1103,6935 |  | 132,89 | 19,85 |
| 1104,7762 |  | 172,26 | 25,73 |
| 1105,1874 |  | 103,06 | 15,4  |
| 1105,7323 |  | 140,62 | 21,01 |
| 1119,7045 |  | 108,1  | 16,15 |
| 1129,2886 |  | 131,19 | 19,6  |
| 1129,7848 |  | 187,83 | 28,06 |
| 1131,2884 |  | 178,03 | 26,6  |
| 1131,6953 |  | 138,02 | 20,62 |
| 1132,6589 |  | 157,68 | 23,56 |
| 1133,2044 |  | 168,82 | 25,22 |
| 1157,8005 |  | 240,81 | 35,97 |
| 1159,2868 |  | 100,52 | 15,02 |
| 1159,3481 |  | 100,81 | 15,06 |
| 1160,8309 |  | 116,36 | 17,38 |
| 1161,2781 |  | 105,98 | 15,83 |
| 1161,6912 |  | 110,24 | 16,47 |
| 1162,238  |  | 120,39 | 17,99 |
| 1187,8395 |  | 164,71 | 24,61 |
| 1188,2078 |  | 144,23 | 21,55 |
| 1189,6809 |  | 118,72 | 17,73 |
| 1190,3315 |  | 178,32 | 26,64 |
| 1190,6781 |  | 129,57 | 19,36 |
| 1191,1686 |  | 119,42 | 17,84 |
| 1194,7026 |  | 127,98 | 19,12 |
| 1215,7812 |  | 149,5  | 22,33 |
| 1217,2688 |  | 183,18 | 27,36 |
| 1218,7702 |  | 149,23 | 22,29 |
| 1244,6931 |  | 122,84 | 18,35 |
| 1247,7455 |  | 257,06 | 38,4  |
| 1273,6744 |  | 149,39 | 22,32 |
| 1274,163  |  | 640,17 | 95,63 |
| 1274,2775 |  | 186,94 | 27,93 |
| 1275,6376 |  | 145,71 | 21,77 |
| 1276,6527 |  | 183,04 | 27,34 |
| 1277,2469 |  | 115,93 | 17,32 |
| 1277,6504 |  | 144,77 | 21,63 |
| 1279,1433 |  | 109,06 | 16,29 |
| 1305,6175 |  | 117,12 | 17,5  |
| 1331,6517 |  | 143,43 | 21,43 |
| 1333,2298 |  | 116,75 | 17,44 |
| 1335,1355 |  | 105,55 | 15,77 |
| 1362,1702 |  | 114,46 | 17,1  |
| 1419,1446 |  | 100,01 | 14,94 |

This report was created by ACD/NMR Processor Academic Edition. For more information go to [www.acdlabs.com/nmrproc/](http://www.acdlabs.com/nmrproc/)

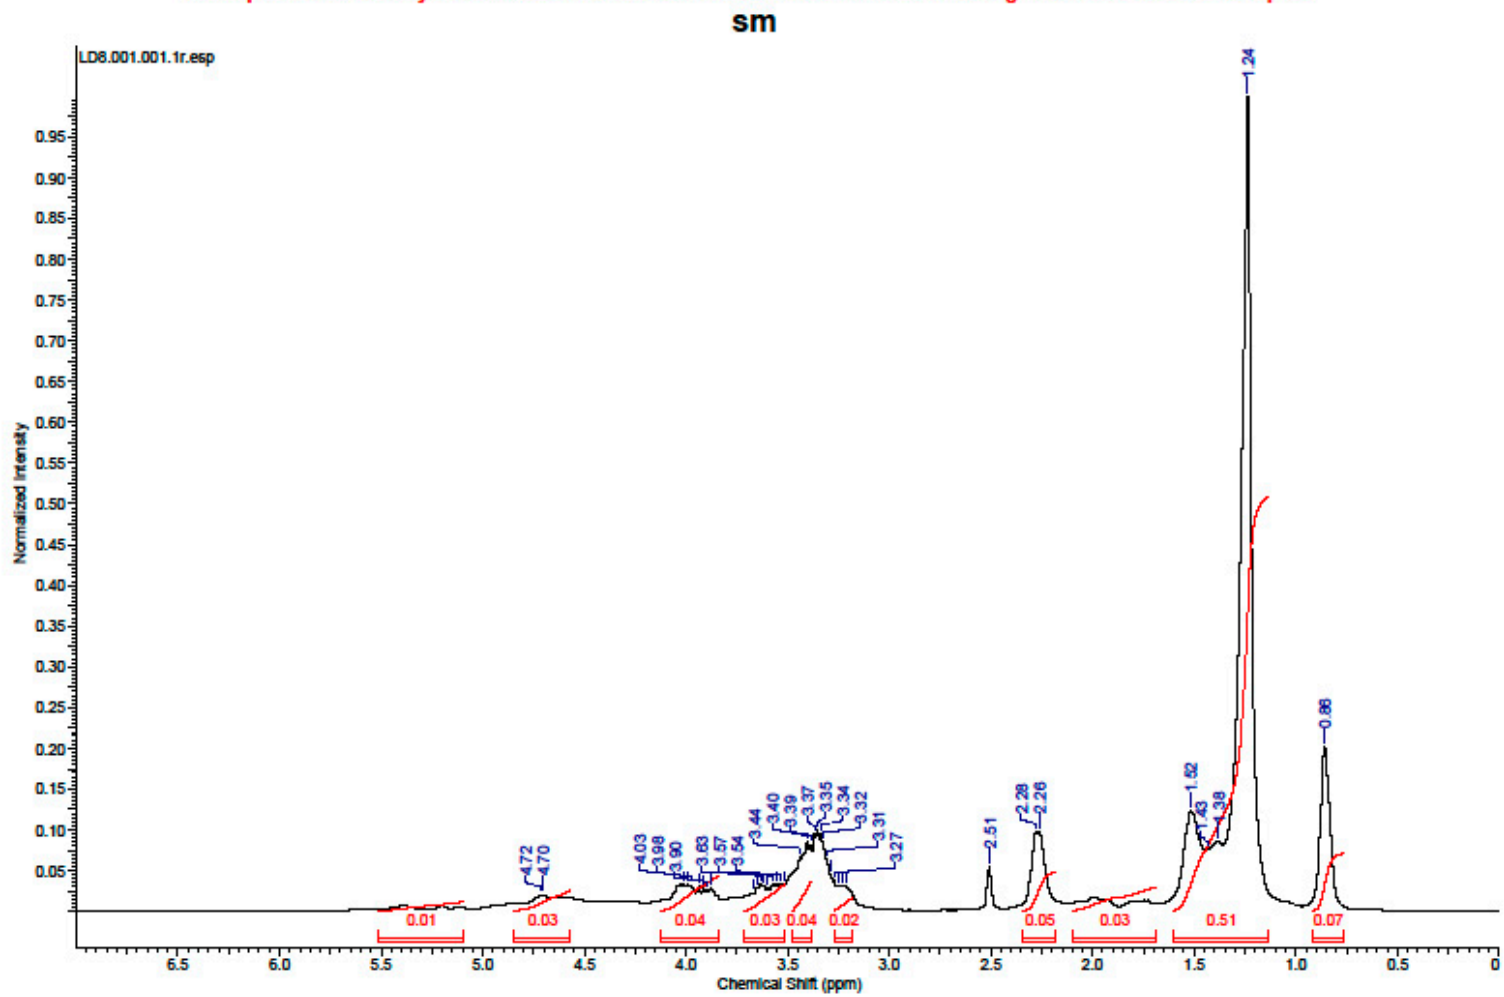

*Esters 16a (Glycerol + epoxidized sunflower oil FAME)*

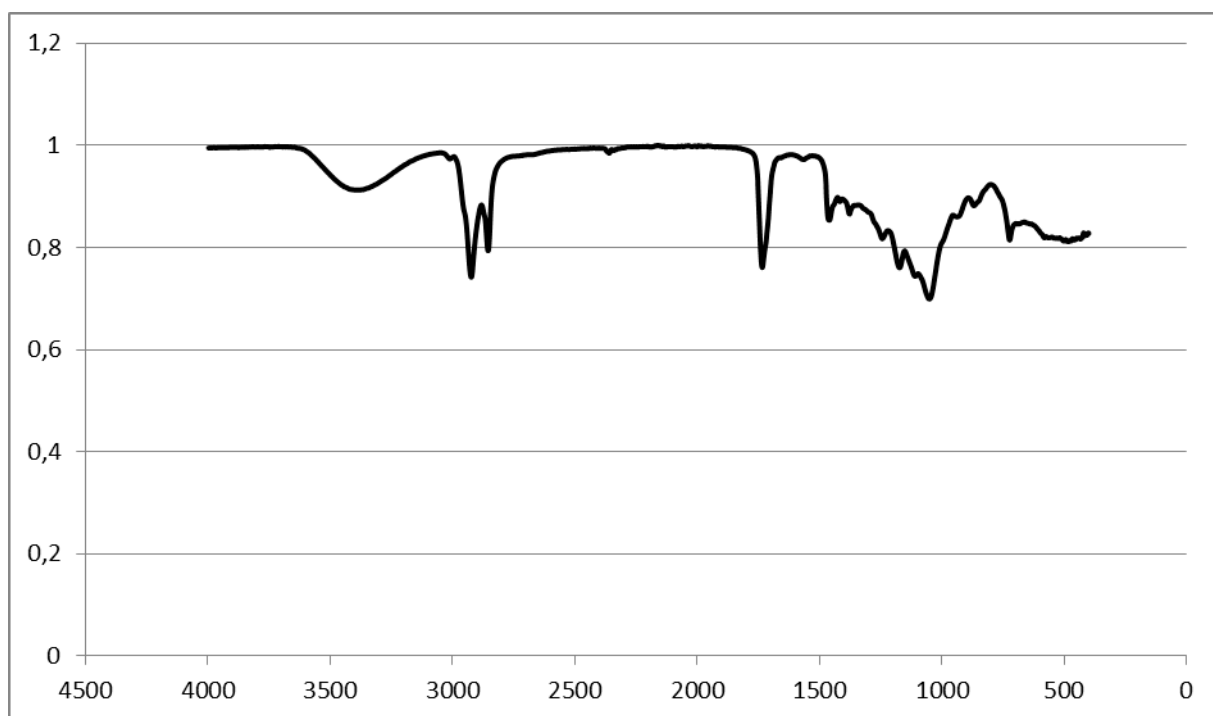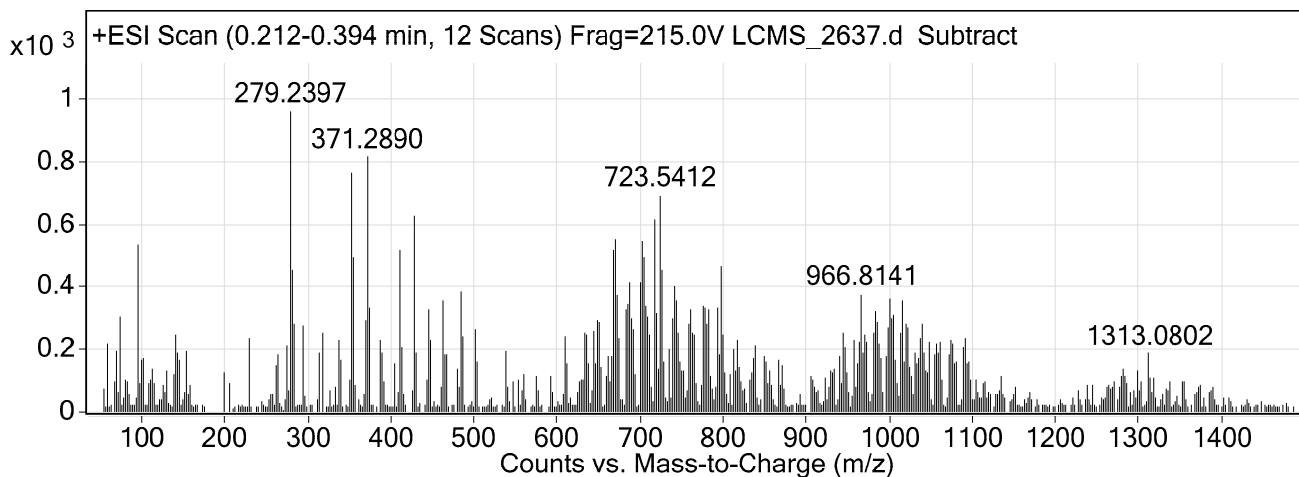

| m/z      | Species | Abund  | Abund % |
|----------|---------|--------|---------|
| 59,0541  |         | 217,89 | 22,66   |
| 69,0725  |         | 193,88 | 20,17   |
| 74,0614  |         | 306,39 | 31,87   |
| 80,0665  |         | 104,78 | 10,9    |
| 95,0844  |         | 148,94 | 15,49   |
| 96,102   |         | 537    | 55,86   |
| 100,1945 |         | 123,01 | 12,79   |
| 100,203  |         | 107,03 | 11,13   |
| 100,2555 |         | 164,59 | 17,12   |
| 101,1372 |         | 173,79 | 18,08   |
| 111,1116 |         | 106,1  | 11,04   |
| 112,1179 |         | 135,57 | 14,1    |
| 130,1636 |         | 131,66 | 13,69   |
| 131,0028 |         | 126,79 | 13,19   |
| 139,1197 |         | 122,44 | 12,74   |
| 140,2534 |         | 247,33 | 25,73   |

|          |  |        |       |
|----------|--|--------|-------|
| 140,2773 |  | 114,44 | 11,9  |
| 142,2525 |  | 136,41 | 14,19 |
| 142,2912 |  | 190,89 | 19,86 |
| 142,3597 |  | 109,18 | 11,36 |
| 144,1647 |  | 164,93 | 17,16 |
| 154,1878 |  | 197,5  | 20,54 |
| 200,2345 |  | 127,47 | 13,26 |
| 230,252  |  | 232,95 | 24,23 |
| 261,2274 |  | 149,72 | 15,57 |
| 263,2375 |  | 139,64 | 14,52 |
| 263,2462 |  | 185,18 | 19,26 |
| 274,2792 |  | 213,05 | 22,16 |
| 279,2397 |  | 961,39 | 100   |
| 279,269  |  | 279,03 | 29,02 |
| 280,2385 |  | 130,6  | 13,58 |
| 281,2551 |  | 454,93 | 47,32 |
| 281,2809 |  | 134,29 | 13,97 |
| 282,3179 |  | 117,01 | 12,17 |
| 284,3711 |  | 278,96 | 29,02 |
| 295,2336 |  | 277,35 | 28,85 |
| 313,281  |  | 188,7  | 19,63 |
| 318,3093 |  | 253,31 | 26,35 |
| 337,2797 |  | 232,85 | 24,22 |
| 339,2988 |  | 166,33 | 17,3  |
| 351,2589 |  | 103,57 | 10,77 |
| 353,2045 |  | 133,32 | 13,87 |
| 353,2753 |  | 763,07 | 79,37 |
| 353,3148 |  | 255,93 | 26,62 |
| 354,2786 |  | 177,75 | 18,49 |
| 355,2914 |  | 496,4  | 51,63 |
| 369,2722 |  | 293,89 | 30,57 |
| 369,3068 |  | 102,28 | 10,64 |
| 371,289  |  | 814,16 | 84,69 |
| 371,3288 |  | 316,71 | 32,94 |
| 372,2929 |  | 135,41 | 14,08 |
| 373,3029 |  | 335,7  | 34,92 |
| 373,3529 |  | 105,57 | 10,98 |
| 387,2775 |  | 120,14 | 12,5  |
| 387,2994 |  | 229,3  | 23,85 |
| 387,3271 |  | 111,86 | 11,64 |
| 389,2996 |  | 189,31 | 19,69 |
| 405,3237 |  | 154,99 | 16,12 |
| 411,2883 |  | 516,91 | 53,77 |
| 411,3245 |  | 330,49 | 34,38 |
| 412,3314 |  | 109,24 | 11,36 |
| 413,3033 |  | 206,57 | 21,49 |
| 413,3299 |  | 144,69 | 15,05 |
| 427,3095 |  | 625,57 | 65,07 |
| 428,2826 |  | 111,49 | 11,6  |
| 429,3309 |  | 367,39 | 38,21 |
| 429,3776 |  | 191,94 | 19,96 |
| 430,3361 |  | 101,54 | 10,56 |
| 431,3407 |  | 126,02 | 13,11 |
| 443,3059 |  | 104,03 | 10,82 |

|          |  |        |       |
|----------|--|--------|-------|
| 445,3277 |  | 326,52 | 33,96 |
| 446,3345 |  | 104,98 | 10,92 |
| 447,3387 |  | 230,62 | 23,99 |
| 463,3358 |  | 353,82 | 36,8  |
| 463,3881 |  | 119,31 | 12,41 |
| 465,3522 |  | 181,28 | 18,86 |
| 467,3078 |  | 181,23 | 18,85 |
| 479,3392 |  | 139,38 | 14,5  |
| 485,326  |  | 385,13 | 40,06 |
| 485,3639 |  | 150,53 | 15,66 |
| 486,3255 |  | 131,36 | 13,66 |
| 487,3506 |  | 242,16 | 25,19 |
| 501,3276 |  | 265,33 | 27,6  |
| 501,3545 |  | 111,05 | 11,55 |
| 503,3711 |  | 161,64 | 16,81 |
| 537,3855 |  | 197,85 | 20,58 |
| 539,3954 |  | 140,03 | 14,57 |
| 546,4098 |  | 100,32 | 10,44 |
| 553,3835 |  | 101,18 | 10,52 |
| 559,3555 |  | 118,48 | 12,32 |
| 575,39   |  | 112,65 | 11,72 |
| 593,4907 |  | 112,31 | 11,68 |
| 609,5219 |  | 242,53 | 25,23 |
| 609,5825 |  | 119,85 | 12,47 |
| 610,5336 |  | 176,94 | 18,4  |
| 611,5328 |  | 157,05 | 16,34 |
| 629,5478 |  | 102,16 | 10,63 |
| 631,498  |  | 103,11 | 10,72 |
| 633,5163 |  | 252,23 | 26,24 |
| 633,5672 |  | 125,88 | 13,09 |
| 635,5432 |  | 245,1  | 25,49 |
| 636,5516 |  | 115,93 | 12,06 |
| 637,5575 |  | 153,88 | 16,01 |
| 643,5437 |  | 222,55 | 23,15 |
| 644,5575 |  | 260,11 | 27,06 |
| 646,5745 |  | 156,59 | 16,29 |
| 649,5183 |  | 291,19 | 30,29 |
| 650,5281 |  | 162,75 | 16,93 |
| 651,5352 |  | 288,2  | 29,98 |
| 651,5884 |  | 120,58 | 12,54 |
| 652,5614 |  | 142,84 | 14,86 |
| 658,5477 |  | 114,15 | 11,87 |
| 660,5545 |  | 180,64 | 18,79 |
| 663,4893 |  | 100,49 | 10,45 |
| 665,5073 |  | 177,55 | 18,47 |
| 665,5511 |  | 137,86 | 14,34 |
| 666,5469 |  | 105,66 | 10,99 |
| 667,537  |  | 454,21 | 47,25 |
| 667,5895 |  | 165,68 | 17,23 |
| 668,5594 |  | 516,83 | 53,76 |
| 668,6133 |  | 132,82 | 13,82 |
| 669,5559 |  | 551,88 | 57,4  |
| 669,6027 |  | 125,01 | 13    |
| 670,5787 |  | 503,47 | 52,37 |

|          |  |        |       |
|----------|--|--------|-------|
| 670,6402 |  | 124,21 | 12,92 |
| 671,5691 |  | 352,96 | 36,71 |
| 672,5983 |  | 376,57 | 39,17 |
| 673,5225 |  | 102,95 | 10,71 |
| 673,5796 |  | 105,58 | 10,98 |
| 674,5806 |  | 113,52 | 11,81 |
| 675,5286 |  | 235,15 | 24,46 |
| 683,5461 |  | 325,83 | 33,89 |
| 684,5544 |  | 295,61 | 30,75 |
| 684,5862 |  | 129,88 | 13,51 |
| 685,5433 |  | 150,16 | 15,62 |
| 685,5682 |  | 347,07 | 36,1  |
| 686,5783 |  | 414,42 | 43,11 |
| 687,5623 |  | 356,72 | 37,1  |
| 687,5965 |  | 138,3  | 14,39 |
| 688,5817 |  | 144,03 | 14,98 |
| 689,5422 |  | 297,44 | 30,94 |
| 690,5799 |  | 128,6  | 13,38 |
| 691,5314 |  | 263,56 | 27,41 |
| 693,5641 |  | 119,07 | 12,39 |
| 701,5538 |  | 412,78 | 42,94 |
| 702,5678 |  | 546,38 | 56,83 |
| 702,6263 |  | 175,76 | 18,28 |
| 703,5704 |  | 360,05 | 37,45 |
| 703,6249 |  | 150,63 | 15,67 |
| 704,5826 |  | 495,36 | 51,53 |
| 705,577  |  | 310,22 | 32,27 |
| 706,5912 |  | 175,07 | 18,21 |
| 707,5338 |  | 342,06 | 35,58 |
| 707,5611 |  | 314,97 | 32,76 |
| 708,5222 |  | 109,31 | 11,37 |
| 708,5723 |  | 218,51 | 22,73 |
| 709,5472 |  | 306,27 | 31,86 |
| 709,574  |  | 251,74 | 26,19 |
| 710,5657 |  | 246,58 | 25,65 |
| 710,6297 |  | 153,14 | 15,93 |
| 711,5658 |  | 122,49 | 12,74 |
| 711,6127 |  | 110,77 | 11,52 |
| 717,5773 |  | 116,16 | 12,08 |
| 718,5767 |  | 617,99 | 64,28 |
| 718,6246 |  | 185,27 | 19,27 |
| 719,5824 |  | 276,72 | 28,78 |
| 720,5804 |  | 315,67 | 32,83 |
| 720,6402 |  | 215,97 | 22,46 |
| 721,5679 |  | 136,4  | 14,19 |
| 723,5412 |  | 692,71 | 72,05 |
| 724,5485 |  | 386,51 | 40,2  |
| 724,6373 |  | 123,56 | 12,85 |
| 725,5607 |  | 454,74 | 47,3  |
| 726,5911 |  | 195,91 | 20,38 |
| 726,6465 |  | 140,26 | 14,59 |
| 727,6184 |  | 163,88 | 17,05 |
| 728,6115 |  | 156,07 | 16,23 |
| 734,5749 |  | 200,87 | 20,89 |

|          |  |        |       |
|----------|--|--------|-------|
| 735,5895 |  | 155,12 | 16,13 |
| 739,5415 |  | 299,83 | 31,19 |
| 740,5905 |  | 181,77 | 18,91 |
| 741,5722 |  | 299,45 | 31,15 |
| 742,6091 |  | 400,43 | 41,65 |
| 743,5925 |  | 317,81 | 33,06 |
| 743,6476 |  | 113,45 | 11,8  |
| 744,6178 |  | 355,49 | 36,98 |
| 744,6743 |  | 110,02 | 11,44 |
| 745,6143 |  | 250,32 | 26,04 |
| 746,6215 |  | 193,77 | 20,15 |
| 747,5761 |  | 160,89 | 16,73 |
| 749,5782 |  | 129,72 | 13,49 |
| 751,5909 |  | 129,91 | 13,51 |
| 758,6033 |  | 280,11 | 29,14 |
| 759,581  |  | 220,41 | 22,93 |
| 759,6157 |  | 220,93 | 22,98 |
| 760,6121 |  | 330,65 | 34,39 |
| 761,5981 |  | 305,1  | 31,74 |
| 761,6424 |  | 141,31 | 14,7  |
| 762,6162 |  | 194,88 | 20,27 |
| 763,556  |  | 187,59 | 19,51 |
| 763,605  |  | 252,36 | 26,25 |
| 765,576  |  | 249,24 | 25,93 |
| 775,5781 |  | 219,6  | 22,84 |
| 776,6137 |  | 337,67 | 35,12 |
| 776,6845 |  | 115,13 | 11,98 |
| 777,5951 |  | 182,27 | 18,96 |
| 777,6321 |  | 196,25 | 20,41 |
| 778,6168 |  | 334,07 | 34,75 |
| 778,6747 |  | 127,7  | 13,28 |
| 779,6023 |  | 280,54 | 29,18 |
| 780,6181 |  | 131,84 | 13,71 |
| 781,5759 |  | 325,32 | 33,84 |
| 781,6139 |  | 122,69 | 12,76 |
| 782,6018 |  | 161,45 | 16,79 |
| 783,5804 |  | 256,12 | 26,64 |
| 784,5922 |  | 116,29 | 12,1  |
| 792,6223 |  | 333,63 | 34,7  |
| 793,6236 |  | 196,51 | 20,44 |
| 794,6142 |  | 185,75 | 19,32 |
| 794,6749 |  | 123,72 | 12,87 |
| 795,6028 |  | 102,09 | 10,62 |
| 797,5744 |  | 463,32 | 48,19 |
| 798,5804 |  | 268,69 | 27,95 |
| 799,5808 |  | 249,7  | 25,97 |
| 800,6366 |  | 201,35 | 20,94 |
| 801,6231 |  | 104,88 | 10,91 |
| 802,6576 |  | 125,54 | 13,06 |
| 808,6013 |  | 118,59 | 12,34 |
| 813,5769 |  | 199,68 | 20,77 |
| 815,6203 |  | 134,22 | 13,96 |
| 816,6436 |  | 194,84 | 20,27 |
| 817,6416 |  | 232,4  | 24,17 |

|          |  |        |       |
|----------|--|--------|-------|
| 818,6567 |  | 144,54 | 15,03 |
| 832,6426 |  | 103,08 | 10,72 |
| 833,6431 |  | 125,01 | 13    |
| 836,6508 |  | 103,14 | 10,73 |
| 837,6118 |  | 172,61 | 17,95 |
| 839,6306 |  | 210,94 | 21,94 |
| 850,6456 |  | 179,48 | 18,67 |
| 852,6631 |  | 161,66 | 16,82 |
| 855,5991 |  | 134,63 | 14    |
| 856,6052 |  | 108,52 | 11,29 |
| 866,6419 |  | 169,11 | 17,59 |
| 871,6133 |  | 149,81 | 15,58 |
| 906,7535 |  | 114,92 | 11,95 |
| 907,798  |  | 102,09 | 10,62 |
| 908,7895 |  | 106,1  | 11,04 |
| 922,7853 |  | 109,07 | 11,34 |
| 929,7422 |  | 134,03 | 13,94 |
| 931,7794 |  | 124,61 | 12,96 |
| 933,799  |  | 139,12 | 14,47 |
| 940,7968 |  | 179,03 | 18,62 |
| 943,8254 |  | 103,91 | 10,81 |
| 945,7631 |  | 251,27 | 26,14 |
| 946,7741 |  | 171,32 | 17,82 |
| 947,7846 |  | 205,06 | 21,33 |
| 948,7722 |  | 128    | 13,31 |
| 949,7922 |  | 129,36 | 13,46 |
| 956,8113 |  | 232,41 | 24,17 |
| 961,7578 |  | 153,15 | 15,93 |
| 963,7877 |  | 182,75 | 19,01 |
| 964,8013 |  | 225,51 | 23,46 |
| 965,7947 |  | 245,63 | 25,55 |
| 965,8589 |  | 104,1  | 10,83 |
| 966,8141 |  | 376,49 | 39,16 |
| 966,8896 |  | 139,12 | 14,47 |
| 967,8145 |  | 162,8  | 16,93 |
| 967,9062 |  | 107,12 | 11,14 |
| 968,8294 |  | 189,27 | 19,69 |
| 969,8245 |  | 247,27 | 25,72 |
| 970,8173 |  | 202,86 | 21,1  |
| 971,7663 |  | 219,52 | 22,83 |
| 971,8369 |  | 119,87 | 12,47 |
| 972,7999 |  | 224,14 | 23,31 |
| 973,779  |  | 107,24 | 11,15 |
| 973,8421 |  | 120,7  | 12,55 |
| 980,8051 |  | 255,86 | 26,61 |
| 981,7947 |  | 203,28 | 21,14 |
| 982,8172 |  | 320,74 | 33,36 |
| 982,8775 |  | 108,13 | 11,25 |
| 983,8132 |  | 232,61 | 24,2  |
| 983,8692 |  | 127,45 | 13,26 |
| 984,8336 |  | 184,11 | 19,15 |
| 985,8202 |  | 286,73 | 29,82 |
| 986,7979 |  | 181,31 | 18,86 |
| 987,7902 |  | 220,29 | 22,91 |

|           |  |        |       |
|-----------|--|--------|-------|
| 988,7685  |  | 110,38 | 11,48 |
| 989,834   |  | 174,55 | 18,16 |
| 990,787   |  | 103,19 | 10,73 |
| 996,8151  |  | 179,5  | 18,67 |
| 997,7906  |  | 123,98 | 12,9  |
| 998,8247  |  | 270,85 | 28,17 |
| 999,8181  |  | 180,42 | 18,77 |
| 1000,8212 |  | 365,07 | 37,97 |
| 1000,8916 |  | 183,56 | 19,09 |
| 1001,7762 |  | 131,5  | 13,68 |
| 1001,8314 |  | 255,14 | 26,54 |
| 1002,8308 |  | 199,82 | 20,78 |
| 1003,7944 |  | 300,81 | 31,29 |
| 1003,8773 |  | 144,47 | 15,03 |
| 1004,802  |  | 177,73 | 18,49 |
| 1005,7903 |  | 308,98 | 32,14 |
| 1005,8652 |  | 137,3  | 14,28 |
| 1006,8082 |  | 168,32 | 17,51 |
| 1007,847  |  | 134,43 | 13,98 |
| 1013,823  |  | 107,52 | 11,18 |
| 1014,8035 |  | 228,93 | 23,81 |
| 1014,8471 |  | 253,19 | 26,34 |
| 1015,821  |  | 256,8  | 26,71 |
| 1016,8335 |  | 356,82 | 37,11 |
| 1017,809  |  | 158,52 | 16,49 |
| 1017,8778 |  | 106,38 | 11,07 |
| 1019,789  |  | 284,49 | 29,59 |
| 1020,7961 |  | 162,72 | 16,93 |
| 1021,7897 |  | 268,25 | 27,9  |
| 1021,842  |  | 191,51 | 19,92 |
| 1022,7897 |  | 124,85 | 12,99 |
| 1022,8503 |  | 162,69 | 16,92 |
| 1023,8383 |  | 144,61 | 15,04 |
| 1027,8182 |  | 112,31 | 11,68 |
| 1030,8286 |  | 190,34 | 19,8  |
| 1031,8238 |  | 110,17 | 11,46 |
| 1032,8276 |  | 156,6  | 16,29 |
| 1033,8157 |  | 118,74 | 12,35 |
| 1035,7813 |  | 172,48 | 17,94 |
| 1036,8174 |  | 237,53 | 24,71 |
| 1037,805  |  | 193,61 | 20,14 |
| 1038,8352 |  | 280,61 | 29,19 |
| 1039,8285 |  | 167,93 | 17,47 |
| 1040,8455 |  | 188,99 | 19,66 |
| 1041,8458 |  | 190,58 | 19,82 |
| 1042,8677 |  | 170,96 | 17,78 |
| 1043,8403 |  | 131    | 13,63 |
| 1045,8238 |  | 126,18 | 13,12 |
| 1046,8206 |  | 108,07 | 11,24 |
| 1047,846  |  | 227,03 | 23,61 |
| 1054,8482 |  | 186,89 | 19,44 |
| 1055,8481 |  | 148,11 | 15,41 |
| 1056,8418 |  | 217,96 | 22,67 |
| 1056,8982 |  | 129,62 | 13,48 |

|           |  |        |       |
|-----------|--|--------|-------|
| 1057,8557 |  | 207,45 | 21,58 |
| 1058,8518 |  | 191,15 | 19,88 |
| 1059,8911 |  | 161,6  | 16,81 |
| 1060,8586 |  | 112,09 | 11,66 |
| 1061,8299 |  | 221,87 | 23,08 |
| 1063,8454 |  | 101,22 | 10,53 |
| 1071,8379 |  | 144,12 | 14,99 |
| 1072,8467 |  | 182,95 | 19,03 |
| 1073,8718 |  | 136,64 | 14,21 |
| 1074,8646 |  | 228,18 | 23,73 |
| 1075,8572 |  | 219,83 | 22,87 |
| 1077,8234 |  | 153,64 | 15,98 |
| 1077,9111 |  | 111,13 | 11,56 |
| 1078,8747 |  | 129,85 | 13,51 |
| 1079,8152 |  | 158,21 | 16,46 |
| 1080,8206 |  | 101,19 | 10,53 |
| 1088,8451 |  | 207,69 | 21,6  |
| 1089,8617 |  | 197,4  | 20,53 |
| 1090,8708 |  | 233,79 | 24,32 |
| 1093,8093 |  | 154,78 | 16,1  |
| 1093,8694 |  | 108,57 | 11,29 |
| 1095,8483 |  | 160,65 | 16,71 |
| 1096,8383 |  | 105,14 | 10,94 |
| 1097,8782 |  | 104,31 | 10,85 |
| 1104,9007 |  | 104,3  | 10,85 |
| 1135,8494 |  | 114,83 | 11,94 |
| 1279,0542 |  | 105,79 | 11    |
| 1280,0582 |  | 115,79 | 12,04 |
| 1281,0782 |  | 135,25 | 14,07 |
| 1284,0457 |  | 113,19 | 11,77 |
| 1300,05   |  | 130,22 | 13,54 |
| 1312,0631 |  | 103,01 | 10,71 |
| 1313,0802 |  | 186,92 | 19,44 |
| 1314,0722 |  | 109,53 | 11,39 |
| 1318,066  |  | 107,31 | 11,16 |
| 1353,1067 |  | 100,21 | 10,42 |

This report was created by ACD/NMR Processor Academic Edition. For more information go to [www.acdlabs.com/nmrproc/](http://www.acdlabs.com/nmrproc/)

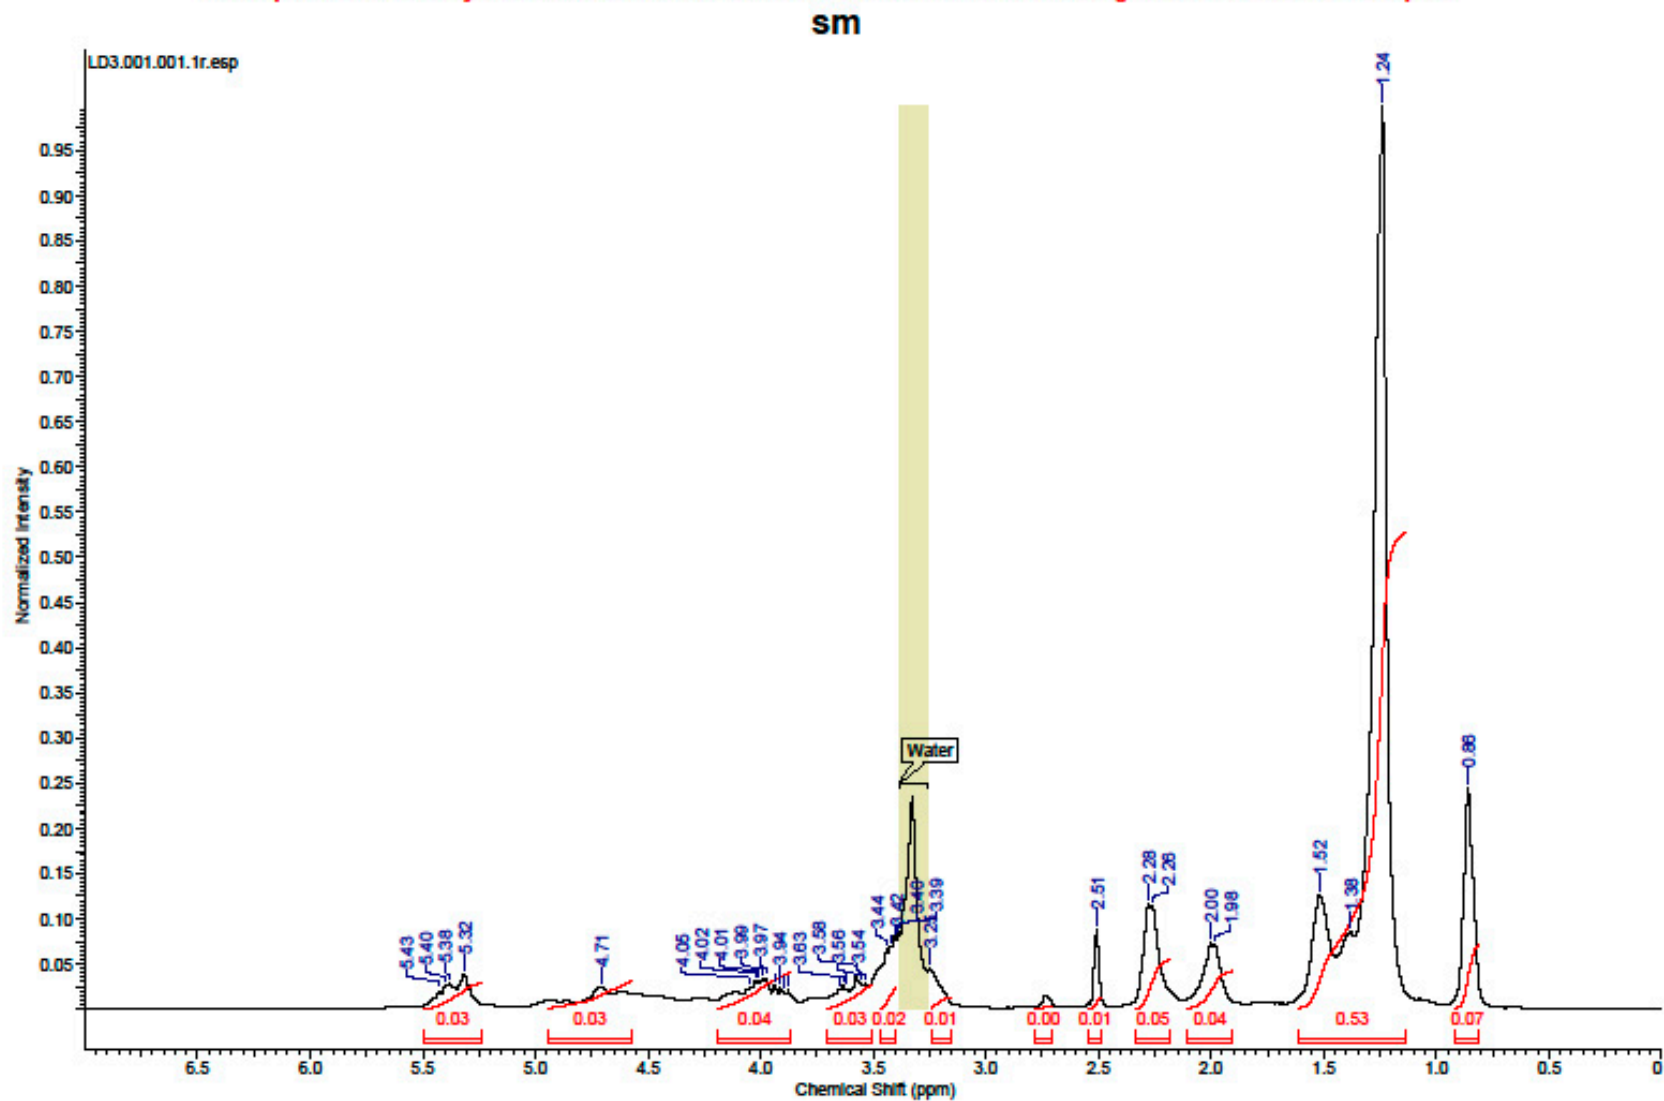

*Esters 16b (Glycerol + epoxidized soybean oil FAME)*

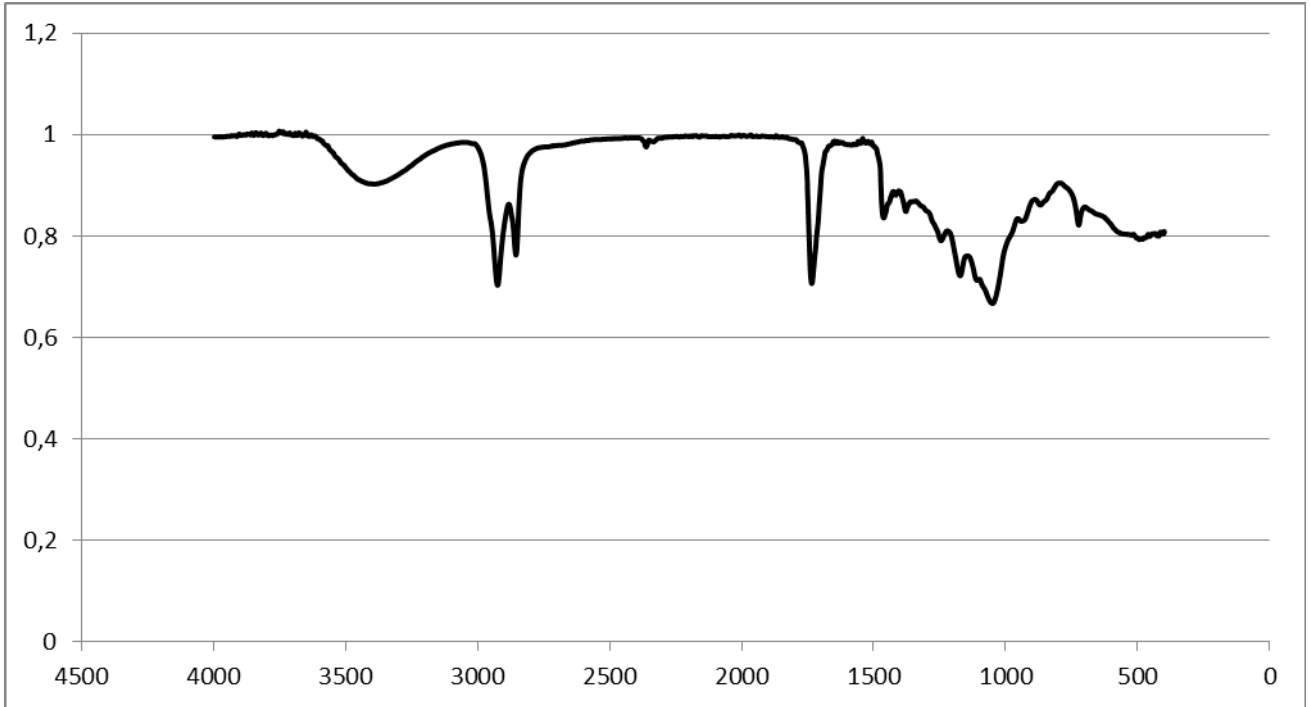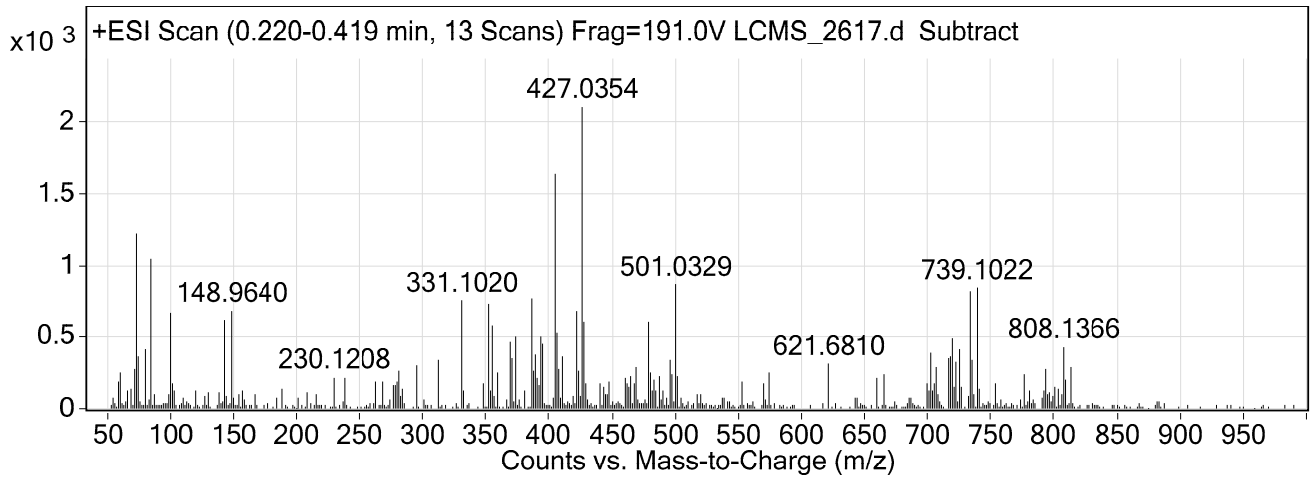

| m/z     | Species  | Abund   | Abund % |
|---------|----------|---------|---------|
| 59,0807 |          | 185,78  | 8,82    |
| 60,0235 |          | 253,02  | 12,02   |
| 60,0443 | (M+3H)+3 | 165,54  | 7,86    |
| 60,0492 |          | 201,89  | 9,59    |
| 67,018  |          | 121,13  | 5,75    |
| 69,0313 |          | 139,42  | 6,62    |
| 71,9124 |          | 277,78  | 13,19   |
| 73,0307 |          | 172,16  | 8,18    |
| 74,0206 | (M+4H)+4 | 1219,84 | 57,94   |
| 74,1463 |          | 108,95  | 5,17    |
| 74,2103 |          | 120,03  | 5,7     |
| 75,0754 |          | 363,4   | 17,26   |
| 80,0096 |          | 411,35  | 19,54   |
| 84,9139 |          | 1050,02 | 49,87   |

|          |        |        |       |
|----------|--------|--------|-------|
| 84,9327  |        | 520,76 | 24,73 |
| 99,0252  |        | 106,64 | 5,07  |
| 100,0779 |        | 668,8  | 31,77 |
| 102,0719 |        | 171,79 | 8,16  |
| 103,0734 |        | 125,23 | 5,95  |
| 120,9708 |        | 129,98 | 6,17  |
| 130,0867 |        | 112,34 | 5,34  |
| 138,9964 |        | 115,93 | 5,51  |
| 142,9228 |        | 612,29 | 29,08 |
| 142,9462 |        | 428,61 | 20,36 |
| 148,964  |        | 681,56 | 32,37 |
| 155,0181 |        | 100,4  | 4,77  |
| 157,8902 |        | 127,14 | 6,04  |
| 157,9143 |        | 117,44 | 5,58  |
| 166,9663 |        | 103,59 | 4,92  |
| 188,9654 |        | 136,18 | 6,47  |
| 209,038  |        | 107,44 | 5,1   |
| 215,9806 |        | 100,16 | 4,76  |
| 230,1208 |        | 218,79 | 10,39 |
| 239,1008 |        | 209,56 | 9,95  |
| 263,0881 |        | 190,91 | 9,07  |
| 268,9505 |        | 193,71 | 9,2   |
| 277,0618 |        | 158,15 | 7,51  |
| 277,0888 |        | 105,62 | 5,02  |
| 279,0751 |        | 161,32 | 7,66  |
| 279,1105 |        | 187,36 | 8,9   |
| 281,0907 |        | 263,51 | 12,52 |
| 284,1747 |        | 143,7  | 6,83  |
| 284,2068 |        | 116,59 | 5,54  |
| 295,0646 |        | 300,26 | 14,26 |
| 313,0675 |        | 106,94 | 5,08  |
| 313,0967 |        | 334,95 | 15,91 |
| 331,102  | (M+H)+ | 752,99 | 35,76 |
| 331,139  | (M+H)+ | 210,78 | 10,01 |
| 332,1008 | (M+H)+ | 128,08 | 6,08  |
| 348,1157 |        | 175,16 | 8,32  |
| 353,0714 | (M+H)+ | 735,71 | 34,94 |
| 353,107  | (M+H)+ | 226,43 | 10,75 |
| 354,0809 | (M+H)+ | 123,52 | 5,87  |
| 355,0853 | (M+H)+ | 578,58 | 27,48 |
| 355,1263 | (M+H)+ | 216,19 | 10,27 |
| 359,1197 |        | 245,98 | 11,68 |
| 369,0583 | (M+H)+ | 464,76 | 22,07 |
| 370,065  | (M+H)+ | 123,98 | 5,89  |
| 371,0741 | (M+H)+ | 355,74 | 16,9  |
| 371,1059 |        | 156,09 | 7,41  |
| 371,1324 |        | 101    | 4,8   |
| 373,0883 | (M+H)+ | 506,96 | 24,08 |
| 373,1237 |        | 195,17 | 9,27  |
| 374,0876 | (M+H)+ | 109,14 | 5,18  |
| 381,0834 |        | 125,26 | 5,95  |
| 387,0673 | (M+H)+ | 767,08 | 36,43 |
| 387,0975 |        | 138,71 | 6,59  |
| 388,0875 |        | 259,27 | 12,31 |

|          |        |         |       |
|----------|--------|---------|-------|
| 388,1156 |        | 182,66  | 8,68  |
| 389,0797 | (M+H)+ | 272,65  | 12,95 |
| 389,1184 |        | 115,03  | 5,46  |
| 390,1073 |        | 382,07  | 18,15 |
| 391,1036 |        | 217,1   | 10,31 |
| 392,1087 |        | 161,45  | 7,67  |
| 393,0685 |        | 503,99  | 23,94 |
| 395,0559 | (M+H)+ | 450,57  | 21,4  |
| 395,1126 |        | 118,93  | 5,65  |
| 405,0654 | (M+H)+ | 1636,25 | 77,72 |
| 405,0952 | (M+H)+ | 356,87  | 16,95 |
| 406,0777 | (M+H)+ | 533,62  | 25,34 |
| 406,1331 |        | 148,08  | 7,03  |
| 407,0914 | (M+H)+ | 145,56  | 6,91  |
| 408,1045 | (M+H)+ | 279,79  | 13,29 |
| 411,0442 | (M+H)+ | 369,39  | 17,54 |
| 411,0755 |        | 126,48  | 6,01  |
| 422,0749 |        | 204,79  | 9,73  |
| 422,0956 | (M+H)+ | 682,77  | 32,43 |
| 422,1152 |        | 234     | 11,11 |
| 423,0663 |        | 108,98  | 5,18  |
| 423,0945 | (M+H)+ | 262,47  | 12,47 |
| 427,0354 | (M+H)+ | 2105,44 | 100   |
| 427,0664 | (M+H)+ | 744,95  | 35,38 |
| 427,129  |        | 100,87  | 4,79  |
| 428,0445 |        | 608,81  | 28,92 |
| 429,0092 | (M+H)+ | 168,85  | 8,02  |
| 429,0354 | (M+H)+ | 100,04  | 4,75  |
| 429,0639 | (M+H)+ | 179,57  | 8,53  |
| 441,0013 |        | 170,46  | 8,1   |
| 442,996  |        | 121,38  | 5,76  |
| 443,0516 |        | 153,67  | 7,3   |
| 447,0787 | (M+H)+ | 185,39  | 8,81  |
| 461,0545 |        | 216,42  | 10,28 |
| 462,0895 |        | 180,12  | 8,55  |
| 463,0634 |        | 154,43  | 7,34  |
| 465,1607 |        | 232,74  | 11,05 |
| 467,0504 |        | 175,8   | 8,35  |
| 469,0557 | (M+H)+ | 294,79  | 14    |
| 469,104  |        | 107,98  | 5,13  |
| 479,0625 | (M+H)+ | 606,83  | 28,82 |
| 479,1201 | (M+H)+ | 182,04  | 8,65  |
| 480,077  | (M+H)+ | 247,22  | 11,74 |
| 482,0993 |        | 128,47  | 6,1   |
| 483,0342 | (M+H)+ | 199,57  | 9,48  |
| 483,1035 |        | 109,65  | 5,21  |
| 485,0308 | (M+H)+ | 124,33  | 5,91  |
| 487,0505 | (M+H)+ | 226,37  | 10,75 |
| 487,1012 |        | 106,8   | 5,07  |
| 490,118  |        | 129,46  | 6,15  |
| 491,1329 |        | 131,39  | 6,24  |
| 496,0747 |        | 322,77  | 15,33 |
| 496,0952 |        | 340,02  | 16,15 |
| 497,0786 |        | 238,44  | 11,32 |

|          |        |        |       |
|----------|--------|--------|-------|
| 501,0329 | (M+H)+ | 866,28 | 41,14 |
| 501,076  | (M+H)+ | 210,51 | 10    |
| 502,0344 | (M+H)+ | 222,27 | 10,56 |
| 517,021  |        | 102,37 | 4,86  |
| 520,1482 |        | 100,2  | 4,76  |
| 553,0707 |        | 191,55 | 9,1   |
| 570,0636 | (M+H)+ | 175,04 | 8,31  |
| 570,1051 | (M+H)+ | 135,25 | 6,42  |
| 575,0332 | (M+H)+ | 255,5  | 12,14 |
| 575,0905 |        | 126,01 | 5,98  |
| 621,681  |        | 314,81 | 14,95 |
| 660,176  |        | 214,07 | 10,17 |
| 665,1303 | (M+H)+ | 240,65 | 11,43 |
| 700,1405 |        | 174,74 | 8,3   |
| 701,1409 |        | 129,66 | 6,16  |
| 702,1538 | (M+H)+ | 388,17 | 18,44 |
| 702,2101 |        | 171,87 | 8,16  |
| 703,1535 | (M+H)+ | 242,68 | 11,53 |
| 704,1635 | (M+H)+ | 131,2  | 6,23  |
| 705,098  |        | 177,11 | 8,41  |
| 707,1115 | (M+H)+ | 290,86 | 13,81 |
| 716,1424 |        | 109,12 | 5,18  |
| 717,1223 |        | 353,66 | 16,8  |
| 717,1894 |        | 104,23 | 4,95  |
| 718,1494 | (M+H)+ | 367,25 | 17,44 |
| 718,2088 | (M+H)+ | 153,29 | 7,28  |
| 719,1369 | (M+H)+ | 116,75 | 5,55  |
| 720,1687 | (M+H)+ | 485,91 | 23,08 |
| 721,1573 | (M+H)+ | 148,14 | 7,04  |
| 721,1986 |        | 127,83 | 6,07  |
| 723,1007 |        | 332,75 | 15,8  |
| 725,1172 | (M+H)+ | 416,98 | 19,8  |
| 725,1618 |        | 154,57 | 7,34  |
| 726,1239 | (M+H)+ | 148,26 | 7,04  |
| 734,1482 | (M+H)+ | 818,76 | 38,89 |
| 734,2138 |        | 188,45 | 8,95  |
| 735,1412 | (M+H)+ | 338,1  | 16,06 |
| 737,06   |        | 104,92 | 4,98  |
| 739,1022 | (M+H)+ | 839,33 | 39,86 |
| 740,1143 | (M+H)+ | 233,33 | 11,08 |
| 741,0824 |        | 135,83 | 6,45  |
| 753,0689 |        | 174,95 | 8,31  |
| 776,1576 |        | 241,86 | 11,49 |
| 781,1136 |        | 122,7  | 5,83  |
| 792,1506 |        | 129,1  | 6,13  |
| 794,1505 |        | 279,16 | 13,26 |
| 795,1016 |        | 103,52 | 4,92  |
| 797,0932 |        | 117,78 | 5,59  |
| 800,1221 |        | 150,44 | 7,15  |
| 803,1667 |        | 133,48 | 6,34  |
| 808,1366 |        | 434,15 | 20,62 |
| 809,1307 |        | 200,65 | 9,53  |
| 813,0886 |        | 285,96 | 13,58 |

This report was created by ACD/NMR Processor Academic Edition. For more information go to [www.acdlabs.com/nmrproc/](http://www.acdlabs.com/nmrproc/)

sm

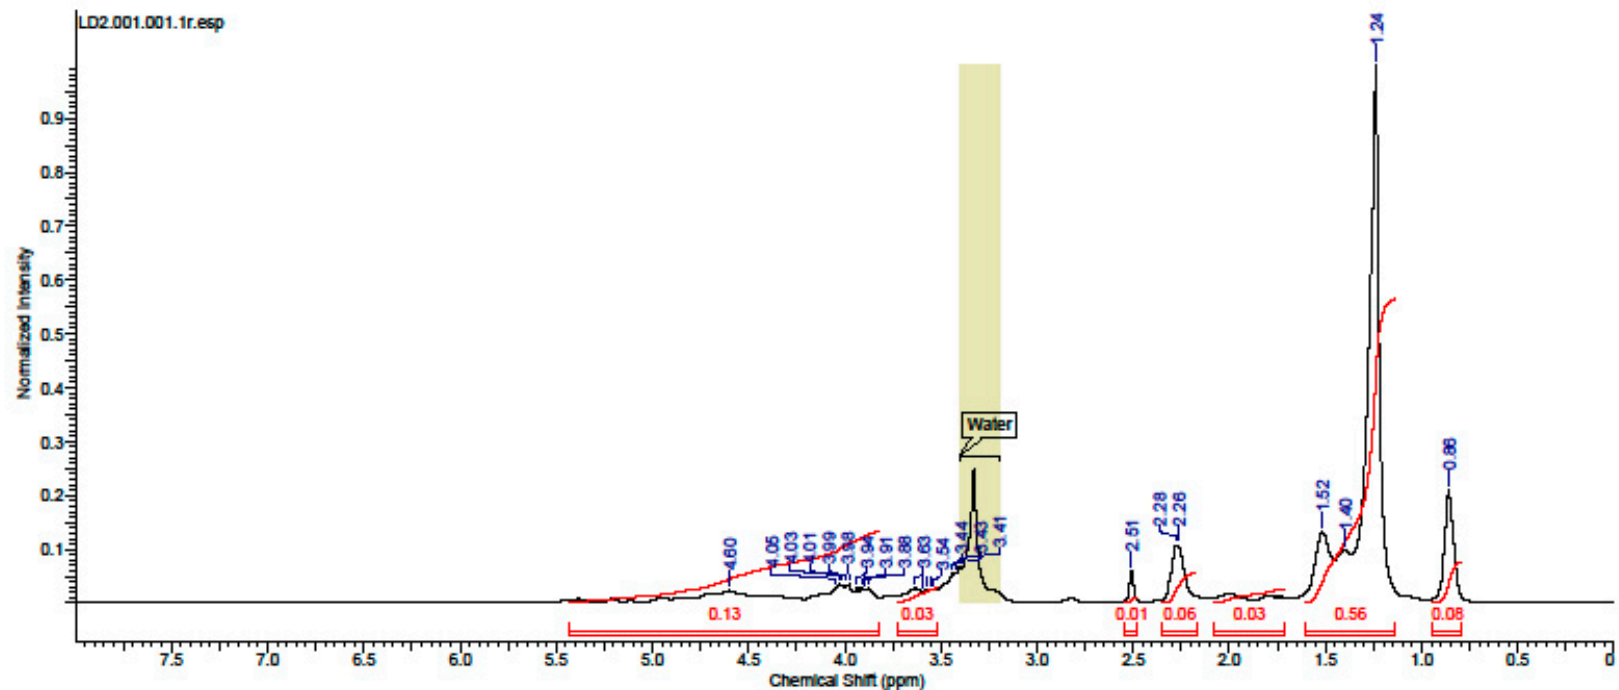

| No. | (ppm) | (Hz)  | Height | No. | (ppm) | (Hz)   | Height | No. | (ppm) | (Hz)   | Height | No. | (ppm) | (Hz)   | Height |
|-----|-------|-------|--------|-----|-------|--------|--------|-----|-------|--------|--------|-----|-------|--------|--------|
| 1   | 0.86  | 257.9 | 0.2103 | 6   | 2.28  | 684.1  | 0.1072 | 11  | 3.54  | 1061.9 | 0.0256 | 16  | 3.88  | 1163.7 | 0.0286 |
| 2   | 1.24  | 371.5 | 1.0000 | 7   | 2.51  | 752.8  | 0.0591 | 12  | 3.56  | 1067.1 | 0.0252 | 17  | 3.90  | 1169.9 | 0.0255 |
| 3   | 1.40  | 420.2 | 0.0996 | 8   | 3.41  | 1022.0 | 0.0668 | 13  | 3.57  | 1072.6 | 0.0247 | 18  | 3.91  | 1174.7 | 0.0281 |
| 4   | 1.52  | 455.9 | 0.1319 | 9   | 3.43  | 1028.0 | 0.0568 | 14  | 3.60  | 1080.3 | 0.0219 | 19  | 3.94  | 1181.4 | 0.0298 |
| 5   | 2.26  | 679.6 | 0.1072 | 10  | 3.44  | 1033.0 | 0.0542 | 15  | 3.63  | 1090.9 | 0.0297 | 20  | 3.98  | 1193.3 | 0.0356 |
|     |       |       |        |     |       |        |        |     |       |        |        | 21  | 3.99  | 1198.4 | 0.0344 |
|     |       |       |        |     |       |        |        |     |       |        |        | 22  | 4.01  | 1204.8 | 0.0338 |
|     |       |       |        |     |       |        |        |     |       |        |        | 23  | 4.03  | 1208.9 | 0.0349 |
|     |       |       |        |     |       |        |        |     |       |        |        | 24  | 4.05  | 1214.4 | 0.0285 |
|     |       |       |        |     |       |        |        |     |       |        |        | 25  | 4.60  | 1381.0 | 0.0227 |

*IR, <sup>1</sup>H NMR spectra and data of HPLC-MS-ESI analysis of esters 17-18*

*Esters 17a (Polyglycerol + epoxidized sunflower oil)*

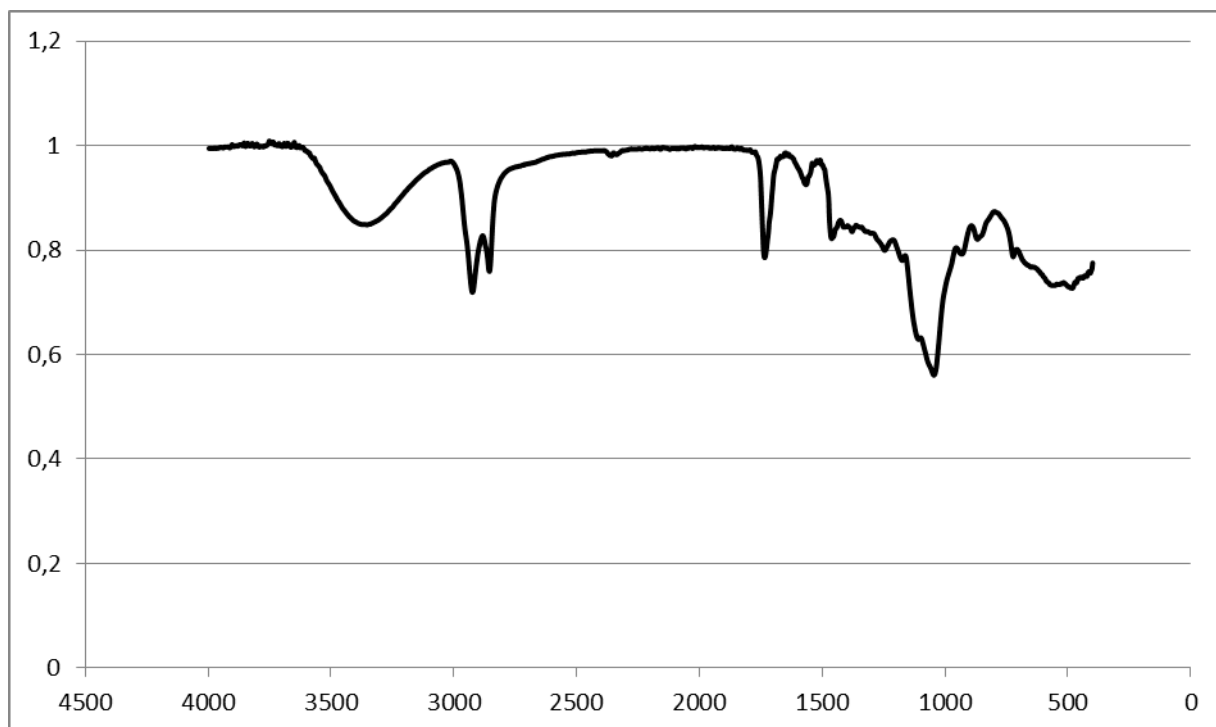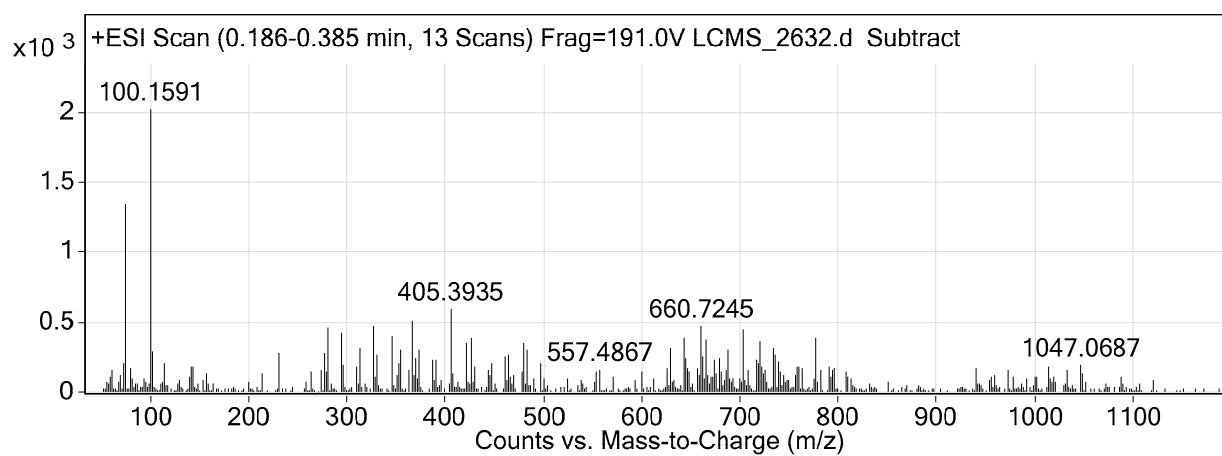

| m/z      | Species | Abund  | Abund % |
|----------|---------|--------|---------|
| 72,0165  |         | 133,07 | 12,93   |
| 75,9758  |         | 129,69 | 12,6    |
| 78,9616  |         | 109,39 | 10,63   |
| 79,9559  |         | 220,22 | 21,4    |
| 82,9726  |         | 156,32 | 15,19   |
| 98,9671  |         | 190,74 | 18,54   |
| 116,949  |         | 111,19 | 10,81   |
| 128,9995 |         | 123,81 | 12,03   |
| 138,9093 |         | 451    | 43,83   |
| 156,9293 |         | 135,08 | 13,13   |
| 184,9226 |         | 279,27 | 27,14   |
| 188,8477 |         | 172,54 | 16,77   |
| 199,966  |         | 101,98 | 9,91    |

|          |  |        |       |
|----------|--|--------|-------|
| 240,8451 |  | 389,26 | 37,83 |
| 244,8116 |  | 340,97 | 33,14 |
| 262,8019 |  | 582,52 | 56,61 |
| 276,8867 |  | 216,49 | 21,04 |
| 276,9222 |  | 120,86 | 11,75 |
| 278,8991 |  | 160,54 | 15,6  |
| 280,9232 |  | 448,73 | 43,61 |
| 281,975  |  | 240,79 | 23,4  |
| 282,0365 |  | 156,14 | 15,17 |
| 282,9882 |  | 244,65 | 23,78 |
| 294,8792 |  | 437,68 | 42,54 |
| 294,9159 |  | 187,22 | 18,2  |
| 295,8768 |  | 117,2  | 11,39 |
| 296,8115 |  | 113,05 | 10,99 |
| 296,881  |  | 100,07 | 9,72  |
| 300,7722 |  | 160,33 | 15,58 |
| 304,0676 |  | 104,74 | 10,18 |
| 312,8662 |  | 611,76 | 59,45 |
| 312,8967 |  | 154,27 | 14,99 |
| 314,7977 |  | 486,15 | 47,25 |
| 314,8524 |  | 101,96 | 9,91  |
| 317,9298 |  | 152,73 | 14,84 |
| 318,7579 |  | 631,58 | 61,38 |
| 318,7914 |  | 271,12 | 26,35 |
| 325,9977 |  | 122,64 | 11,92 |
| 330,8508 |  | 271,69 | 26,4  |
| 336,748  |  | 516,42 | 50,19 |
| 336,7862 |  | 293,61 | 28,53 |
| 352,8151 |  | 334,64 | 32,52 |
| 352,8495 |  | 131,87 | 12,82 |
| 354,8701 |  | 247,36 | 24,04 |
| 368,8318 |  | 350,61 | 34,07 |
| 370,7475 |  | 111,65 | 10,85 |
| 370,9157 |  | 129,22 | 12,56 |
| 372,8596 |  | 276,77 | 26,9  |
| 374,7205 |  | 146,63 | 14,25 |
| 386,8222 |  | 622,04 | 60,45 |
| 386,8494 |  | 101,69 | 9,88  |
| 387,9038 |  | 128,01 | 12,44 |
| 388,7654 |  | 114,31 | 11,11 |
| 390,8383 |  | 380,81 | 37,01 |
| 390,8836 |  | 162,32 | 15,78 |
| 392,711  |  | 478,61 | 46,51 |
| 392,7462 |  | 123,3  | 11,98 |
| 400,8052 |  | 124,65 | 12,11 |
| 404,8119 |  | 897,16 | 87,19 |
| 404,8454 |  | 171,06 | 16,62 |
| 405,8116 |  | 333,09 | 32,37 |
| 405,8572 |  | 194,76 | 18,93 |
| 407,8557 |  | 298,19 | 28,98 |
| 407,8749 |  | 140,25 | 13,63 |
| 407,9011 |  | 101,04 | 9,82  |
| 408,8365 |  | 129,87 | 12,62 |
| 410,6913 |  | 393,42 | 38,23 |

|          |  |         |       |
|----------|--|---------|-------|
| 410,7279 |  | 143,99  | 13,99 |
| 410,778  |  | 120,71  | 11,73 |
| 412,8003 |  | 150,23  | 14,6  |
| 421,8053 |  | 124,14  | 12,06 |
| 421,8305 |  | 345,13  | 33,54 |
| 421,8607 |  | 144,36  | 14,03 |
| 422,8291 |  | 140,97  | 13,7  |
| 426,7713 |  | 861,3   | 83,7  |
| 427,7604 |  | 146,31  | 14,22 |
| 442,7699 |  | 263,47  | 25,6  |
| 446,8024 |  | 156,92  | 15,25 |
| 446,836  |  | 109,93  | 10,68 |
| 448,663  |  | 104,03  | 10,11 |
| 460,7707 |  | 575,83  | 55,96 |
| 460,807  |  | 148,45  | 14,43 |
| 461,7647 |  | 180,82  | 17,57 |
| 461,7928 |  | 130,72  | 12,7  |
| 462,7091 |  | 103,35  | 10,04 |
| 462,7739 |  | 234,9   | 22,83 |
| 463,8121 |  | 151,29  | 14,7  |
| 464,7963 |  | 562,49  | 54,66 |
| 466,6655 |  | 305,71  | 29,71 |
| 468,7561 |  | 159,86  | 15,54 |
| 477,7735 |  | 233,42  | 22,68 |
| 478,7652 |  | 1028,98 | 100   |
| 478,8137 |  | 155,13  | 15,08 |
| 479,7484 |  | 135,51  | 13,17 |
| 479,774  |  | 291,45  | 28,32 |
| 481,8014 |  | 202,89  | 19,72 |
| 482,7327 |  | 520,1   | 50,54 |
| 482,7886 |  | 206,28  | 20,05 |
| 483,7387 |  | 126,62  | 12,31 |
| 484,6581 |  | 145,39  | 14,13 |
| 484,71   |  | 193,27  | 18,78 |
| 486,7476 |  | 184,31  | 17,91 |
| 486,7933 |  | 282,21  | 27,43 |
| 495,7793 |  | 517,56  | 50,3  |
| 496,7545 |  | 219,27  | 21,31 |
| 496,7893 |  | 188,18  | 18,29 |
| 500,7173 |  | 1014,68 | 98,61 |
| 500,7475 |  | 336,93  | 32,74 |
| 501,7213 |  | 323,91  | 31,48 |
| 502,7461 |  | 148,1   | 14,39 |
| 514,7135 |  | 127,25  | 12,37 |
| 516,7127 |  | 120,42  | 11,7  |
| 520,7534 |  | 195,55  | 19    |
| 534,717  |  | 193,99  | 18,85 |
| 537,7406 |  | 123,84  | 12,04 |
| 538,7474 |  | 417,79  | 40,6  |
| 540,601  |  | 138,28  | 13,44 |
| 540,6298 |  | 126,57  | 12,3  |
| 542,7045 |  | 198,19  | 19,26 |
| 551,7228 |  | 282,31  | 27,44 |
| 552,7156 |  | 669,97  | 65,11 |

|          |  |        |       |
|----------|--|--------|-------|
| 552,755  |  | 120,17 | 11,68 |
| 553,7137 |  | 354,34 | 34,44 |
| 556,6806 |  | 558,76 | 54,3  |
| 556,7069 |  | 107,62 | 10,46 |
| 556,7552 |  | 184,16 | 17,9  |
| 557,6863 |  | 134,29 | 13,05 |
| 558,6665 |  | 122,82 | 11,94 |
| 560,6989 |  | 365,4  | 35,51 |
| 560,7441 |  | 151,62 | 14,73 |
| 569,7169 |  | 445,01 | 43,25 |
| 569,7749 |  | 261,99 | 25,46 |
| 570,7133 |  | 347,89 | 33,81 |
| 574,6654 |  | 843,5  | 81,98 |
| 574,7199 |  | 245,41 | 23,85 |
| 575,6394 |  | 107,96 | 10,49 |
| 575,6913 |  | 327,41 | 31,82 |
| 589,7178 |  | 135,67 | 13,19 |
| 608,6687 |  | 132,78 | 12,9  |
| 610,6475 |  | 141,06 | 13,71 |
| 610,7781 |  | 177,09 | 17,21 |
| 611,7982 |  | 102,29 | 9,94  |
| 612,6939 |  | 266,3  | 25,88 |
| 616,6626 |  | 213,47 | 20,75 |
| 618,5793 |  | 178,68 | 17,37 |
| 625,7041 |  | 109,06 | 10,6  |
| 626,6739 |  | 309,75 | 30,1  |
| 627,6578 |  | 199,68 | 19,41 |
| 628,7508 |  | 140,35 | 13,64 |
| 629,6906 |  | 106,83 | 10,38 |
| 629,7408 |  | 172,26 | 16,74 |
| 630,619  |  | 427,49 | 41,55 |
| 630,6695 |  | 308,2  | 29,95 |
| 631,6163 |  | 122,2  | 11,88 |
| 632,6348 |  | 113,27 | 11,01 |
| 634,6663 |  | 291,68 | 28,35 |
| 635,6515 |  | 102,65 | 9,98  |
| 642,74   |  | 312,11 | 30,33 |
| 643,685  |  | 327,56 | 31,83 |
| 643,7532 |  | 129,13 | 12,55 |
| 644,7007 |  | 222,28 | 21,6  |
| 645,7754 |  | 155,08 | 15,07 |
| 648,6186 |  | 748,76 | 72,77 |
| 649,6218 |  | 155,43 | 15,1  |
| 650,7121 |  | 174,35 | 16,94 |
| 659,7395 |  | 247,83 | 24,08 |
| 660,768  |  | 121,47 | 11,8  |
| 662,5503 |  | 199,87 | 19,42 |
| 664,6957 |  | 244,28 | 23,74 |
| 664,749  |  | 129,26 | 12,56 |
| 670,7363 |  | 149,68 | 14,55 |
| 677,6527 |  | 101,59 | 9,87  |
| 678,7    |  | 178,63 | 17,36 |
| 682,6644 |  | 139,98 | 13,6  |
| 684,7105 |  | 204,47 | 19,87 |

|          |  |        |       |
|----------|--|--------|-------|
| 684,756  |  | 147,58 | 14,34 |
| 685,719  |  | 108,01 | 10,5  |
| 685,784  |  | 146,77 | 14,26 |
| 687,7392 |  | 118,84 | 11,55 |
| 692,6922 |  | 115,46 | 11,22 |
| 698,5891 |  | 119,46 | 11,61 |
| 698,6654 |  | 110,73 | 10,76 |
| 699,6546 |  | 166,35 | 16,17 |
| 700,6174 |  | 255,71 | 24,85 |
| 701,6322 |  | 200,03 | 19,44 |
| 701,7641 |  | 106,65 | 10,36 |
| 702,7614 |  | 166,06 | 16,14 |
| 703,6935 |  | 267,72 | 26,02 |
| 703,75   |  | 142,08 | 13,81 |
| 704,5738 |  | 232,26 | 22,57 |
| 704,6351 |  | 229,58 | 22,31 |
| 704,7239 |  | 144,5  | 14,04 |
| 705,5675 |  | 106,86 | 10,38 |
| 705,738  |  | 170,95 | 16,61 |
| 706,7014 |  | 102,99 | 10,01 |
| 708,6844 |  | 166,53 | 16,18 |
| 713,6834 |  | 276,82 | 26,9  |
| 716,6789 |  | 473,66 | 46,03 |
| 716,7448 |  | 135,02 | 13,12 |
| 717,6768 |  | 486,37 | 47,27 |
| 719,7136 |  | 704,52 | 68,47 |
| 720,6164 |  | 113,07 | 10,99 |
| 720,6821 |  | 134,29 | 13,05 |
| 720,7752 |  | 185,19 | 18    |
| 722,6668 |  | 139,08 | 13,52 |
| 723,5551 |  | 179,98 | 17,49 |
| 724,6587 |  | 470,93 | 45,77 |
| 724,7213 |  | 235,15 | 22,85 |
| 726,7284 |  | 165,18 | 16,05 |
| 727,7346 |  | 118,61 | 11,53 |
| 733,6942 |  | 491,82 | 47,8  |
| 734,6672 |  | 278,32 | 27,05 |
| 734,7097 |  | 103,32 | 10,04 |
| 734,76   |  | 104,9  | 10,19 |
| 738,6364 |  | 554,58 | 53,9  |
| 739,6387 |  | 250,03 | 24,3  |
| 740,7076 |  | 138,12 | 13,42 |
| 741,3783 |  | 209,39 | 20,35 |
| 742,5685 |  | 118,89 | 11,55 |
| 756,5764 |  | 104,53 | 10,16 |
| 756,6443 |  | 143,93 | 13,99 |
| 759,6574 |  | 191,03 | 18,56 |
| 760,5474 |  | 111,56 | 10,84 |
| 760,6902 |  | 217,88 | 21,17 |
| 761,7403 |  | 142,07 | 13,81 |
| 766,5949 |  | 134,73 | 13,09 |
| 772,6575 |  | 166,06 | 16,14 |
| 773,5829 |  | 154,95 | 15,06 |
| 773,6577 |  | 178,04 | 17,3  |

|          |  |        |       |
|----------|--|--------|-------|
| 774,6577 |  | 107,37 | 10,44 |
| 775,6532 |  | 165,96 | 16,13 |
| 775,7016 |  | 114,51 | 11,13 |
| 776,6576 |  | 382,58 | 37,18 |
| 778,0379 |  | 157,48 | 15,3  |
| 778,5078 |  | 188,88 | 18,36 |
| 779,3465 |  | 155,69 | 15,13 |
| 780,608  |  | 137,49 | 13,36 |
| 781,5916 |  | 108,47 | 10,54 |
| 782,584  |  | 136,05 | 13,22 |
| 789,6477 |  | 177,43 | 17,24 |
| 790,6301 |  | 379,86 | 36,92 |
| 791,6468 |  | 466,58 | 45,34 |
| 791,7207 |  | 154,86 | 15,05 |
| 792,6254 |  | 122,25 | 11,88 |
| 793,6582 |  | 495,69 | 48,17 |
| 793,7336 |  | 144,12 | 14,01 |
| 794,6219 |  | 226,6  | 22,02 |
| 794,7075 |  | 211,54 | 20,56 |
| 795,5974 |  | 104,51 | 10,16 |
| 795,6667 |  | 136,99 | 13,31 |
| 796,4997 |  | 143,53 | 13,95 |
| 796,5922 |  | 350,96 | 34,11 |
| 796,6623 |  | 106,19 | 10,32 |
| 798,6317 |  | 117,41 | 11,41 |
| 798,6772 |  | 172,34 | 16,75 |
| 798,9488 |  | 125,66 | 12,21 |
| 799,6352 |  | 180,31 | 17,52 |
| 805,6813 |  | 136,63 | 13,28 |
| 807,636  |  | 509,24 | 49,49 |
| 807,6973 |  | 219,59 | 21,34 |
| 808,6321 |  | 344,02 | 33,43 |
| 808,6943 |  | 125,9  | 12,24 |
| 809,7023 |  | 274,83 | 26,71 |
| 810,535  |  | 112,71 | 10,95 |
| 812,61   |  | 271,42 | 26,38 |
| 812,6615 |  | 198,77 | 19,32 |
| 813,163  |  | 179,52 | 17,45 |
| 813,6045 |  | 368,08 | 35,77 |
| 814,604  |  | 164,71 | 16,01 |
| 815,6038 |  | 158,22 | 15,38 |
| 816,3649 |  | 127,71 | 12,41 |
| 818,3551 |  | 107,78 | 10,47 |
| 820,6047 |  | 123,05 | 11,96 |
| 835,7063 |  | 140,64 | 13,67 |
| 836,0302 |  | 147,61 | 14,35 |
| 836,6956 |  | 121,65 | 11,82 |
| 837,2778 |  | 129,36 | 12,57 |
| 838,013  |  | 101,76 | 9,89  |
| 838,6199 |  | 721,19 | 70,09 |
| 839,2125 |  | 107,7  | 10,47 |
| 840,6328 |  | 106,68 | 10,37 |
| 841,0837 |  | 148,99 | 14,48 |
| 841,627  |  | 366,23 | 35,59 |

|          |  |        |       |
|----------|--|--------|-------|
| 843,576  |  | 113,38 | 11,02 |
| 846,584  |  | 122,3  | 11,89 |
| 847,5962 |  | 236,95 | 23,03 |
| 848,5987 |  | 108,05 | 10,5  |
| 849,5955 |  | 189,37 | 18,4  |
| 849,6948 |  | 104    | 10,11 |
| 850,6094 |  | 204,88 | 19,91 |
| 850,6746 |  | 134,81 | 13,1  |
| 851,5981 |  | 115,75 | 11,25 |
| 851,6484 |  | 246,13 | 23,92 |
| 852,5319 |  | 130,57 | 12,69 |
| 853,5766 |  | 120,53 | 11,71 |
| 854,575  |  | 200,32 | 19,47 |
| 854,6407 |  | 171,7  | 16,69 |
| 863,601  |  | 116,99 | 11,37 |
| 864,5817 |  | 372,08 | 36,16 |
| 865,5887 |  | 259,39 | 25,21 |
| 866,5425 |  | 132,4  | 12,87 |
| 868,5262 |  | 105,71 | 10,27 |
| 869,1648 |  | 119,41 | 11,6  |
| 869,584  |  | 123,89 | 12,04 |
| 870,4578 |  | 136,52 | 13,27 |
| 872,4984 |  | 176,9  | 17,19 |
| 872,5736 |  | 111,01 | 10,79 |
| 872,614  |  | 238,61 | 23,19 |
| 873,6337 |  | 115,28 | 11,2  |
| 876,9015 |  | 104,93 | 10,2  |
| 878,5822 |  | 111,36 | 10,82 |
| 881,5797 |  | 367,52 | 35,72 |
| 881,6361 |  | 182,19 | 17,71 |
| 882,5955 |  | 315,56 | 30,67 |
| 883,5802 |  | 174,54 | 16,96 |
| 886,5261 |  | 435,37 | 42,31 |
| 886,6007 |  | 178,05 | 17,3  |
| 888,661  |  | 168,1  | 16,34 |
| 896,861  |  | 104,71 | 10,18 |
| 898,124  |  | 313,21 | 30,44 |
| 898,6332 |  | 115,64 | 11,24 |
| 900,0731 |  | 445,68 | 43,31 |
| 902,5015 |  | 116,18 | 11,29 |
| 907,6009 |  | 200,59 | 19,49 |
| 908,6667 |  | 130,78 | 12,71 |
| 909,5448 |  | 105,11 | 10,22 |
| 914,5352 |  | 196,41 | 19,09 |
| 915,2915 |  | 103,56 | 10,06 |
| 917,5784 |  | 118,45 | 11,51 |
| 923,5582 |  | 146,18 | 14,21 |
| 924,5376 |  | 123,05 | 11,96 |
| 924,5859 |  | 123,49 | 12    |
| 926,4689 |  | 113,34 | 11,02 |
| 927,7172 |  | 106,91 | 10,39 |
| 928,6111 |  | 520,16 | 50,55 |
| 928,7552 |  | 130,68 | 12,7  |
| 929,6491 |  | 167,26 | 16,25 |

|           |  |        |       |
|-----------|--|--------|-------|
| 930,537   |  | 335,6  | 32,61 |
| 932,6229  |  | 168,71 | 16,4  |
| 934,297   |  | 117,03 | 11,37 |
| 936,0775  |  | 157,33 | 15,29 |
| 936,5535  |  | 172,54 | 16,77 |
| 937,5268  |  | 229,78 | 22,33 |
| 937,584   |  | 116,93 | 11,36 |
| 938,4773  |  | 113,56 | 11,04 |
| 939,4893  |  | 134,9  | 13,11 |
| 939,6099  |  | 134,73 | 13,09 |
| 940,5728  |  | 176,38 | 17,14 |
| 941,5261  |  | 102,69 | 9,98  |
| 941,5835  |  | 262,66 | 25,53 |
| 942,4757  |  | 116,41 | 11,31 |
| 942,5564  |  | 241,53 | 23,47 |
| 943,5339  |  | 138,94 | 13,5  |
| 947,5087  |  | 157,57 | 15,31 |
| 954,6449  |  | 141,02 | 13,7  |
| 955,1685  |  | 131,29 | 12,76 |
| 956,571   |  | 152,83 | 14,85 |
| 957,6449  |  | 215,72 | 20,96 |
| 958,1437  |  | 190,88 | 18,55 |
| 959,5039  |  | 184,15 | 17,9  |
| 960,0361  |  | 146,91 | 14,28 |
| 960,5826  |  | 225,69 | 21,93 |
| 961,5044  |  | 185,85 | 18,06 |
| 963,6152  |  | 174,96 | 17    |
| 965,528   |  | 106,84 | 10,38 |
| 965,5945  |  | 136,27 | 13,24 |
| 966,0239  |  | 128,95 | 12,53 |
| 967,4921  |  | 186,01 | 18,08 |
| 968,0125  |  | 168,57 | 16,38 |
| 968,6607  |  | 104,83 | 10,19 |
| 973,5253  |  | 147,82 | 14,37 |
| 982,5406  |  | 107,86 | 10,48 |
| 984,2188  |  | 104,38 | 10,14 |
| 985,4444  |  | 142,6  | 13,86 |
| 985,5316  |  | 172,53 | 16,77 |
| 985,8202  |  | 113,32 | 11,01 |
| 988,601   |  | 165,3  | 16,06 |
| 988,726   |  | 124,46 | 12,1  |
| 990,1786  |  | 104,98 | 10,2  |
| 994,0992  |  | 118,64 | 11,53 |
| 995,108   |  | 123,72 | 12,02 |
| 995,4928  |  | 120,27 | 11,69 |
| 996,547   |  | 246,47 | 23,95 |
| 996,6251  |  | 181,98 | 17,69 |
| 996,9871  |  | 123,01 | 11,95 |
| 997,0472  |  | 108,79 | 10,57 |
| 997,5061  |  | 230,33 | 22,38 |
| 997,5893  |  | 103,87 | 10,09 |
| 998,5001  |  | 173,87 | 16,9  |
| 1003,5273 |  | 109,07 | 10,6  |
| 1004,117  |  | 131,43 | 12,77 |

|           |  |        |       |
|-----------|--|--------|-------|
| 1011,5724 |  | 124,62 | 12,11 |
| 1013,1407 |  | 151,01 | 14,68 |
| 1013,2368 |  | 135,61 | 13,18 |
| 1014,6441 |  | 122,38 | 11,89 |
| 1015,1016 |  | 164,36 | 15,97 |
| 1015,5999 |  | 209,39 | 20,35 |
| 1015,8904 |  | 105,13 | 10,22 |
| 1016,126  |  | 101,3  | 9,84  |
| 1016,4042 |  | 156,21 | 15,18 |
| 1016,5925 |  | 222,96 | 21,67 |
| 1017,1285 |  | 122,46 | 11,9  |
| 1017,3371 |  | 104,05 | 10,11 |
| 1017,5166 |  | 294,92 | 28,66 |
| 1018,1119 |  | 111,22 | 10,81 |
| 1018,5487 |  | 206,17 | 20,04 |
| 1020,4646 |  | 101,06 | 9,82  |
| 1023,0149 |  | 177,52 | 17,25 |
| 1023,5151 |  | 255,44 | 24,82 |
| 1024,003  |  | 121,4  | 11,8  |
| 1024,0583 |  | 125,69 | 12,22 |
| 1025,4931 |  | 138,62 | 13,47 |
| 1025,9758 |  | 112,82 | 10,96 |
| 1029,5549 |  | 157,87 | 15,34 |
| 1030,4811 |  | 129,58 | 12,59 |
| 1030,5716 |  | 103,25 | 10,03 |
| 1031,5184 |  | 104,55 | 10,16 |
| 1031,5946 |  | 123,35 | 11,99 |
| 1032,5378 |  | 201,37 | 19,57 |
| 1036,5003 |  | 151,02 | 14,68 |
| 1036,5669 |  | 144,55 | 14,05 |
| 1037,5448 |  | 138,92 | 13,5  |
| 1041,7087 |  | 102,84 | 9,99  |
| 1042,2373 |  | 105,37 | 10,24 |
| 1043,3288 |  | 103,89 | 10,1  |
| 1044,0893 |  | 280,9  | 27,3  |
| 1044,204  |  | 136,76 | 13,29 |
| 1045,1014 |  | 201,11 | 19,54 |
| 1045,2804 |  | 129,62 | 12,6  |
| 1046,534  |  | 534,05 | 51,9  |
| 1046,6743 |  | 178,15 | 17,31 |
| 1047,2038 |  | 115,27 | 11,2  |
| 1047,4909 |  | 260,56 | 25,32 |
| 1047,662  |  | 117,05 | 11,38 |
| 1049,5822 |  | 104,24 | 10,13 |
| 1051,5423 |  | 105,67 | 10,27 |
| 1051,9905 |  | 214,01 | 20,8  |
| 1052,4956 |  | 213,21 | 20,72 |
| 1052,9909 |  | 326    | 31,68 |
| 1053,5152 |  | 113,79 | 11,06 |
| 1054,4752 |  | 220,05 | 21,39 |
| 1054,6527 |  | 107,15 | 10,41 |
| 1054,9652 |  | 239,94 | 23,32 |
| 1055,3858 |  | 111,42 | 10,83 |
| 1055,4778 |  | 115,04 | 11,18 |

|           |  |        |       |
|-----------|--|--------|-------|
| 1066,4337 |  | 106,45 | 10,34 |
| 1073,0795 |  | 143,23 | 13,92 |
| 1073,2322 |  | 146,22 | 14,21 |
| 1073,5735 |  | 154,02 | 14,97 |
| 1074,0851 |  | 210,96 | 20,5  |
| 1074,3695 |  | 143,29 | 13,93 |
| 1074,614  |  | 102,67 | 9,98  |
| 1074,7233 |  | 107,97 | 10,49 |
| 1074,9803 |  | 156,3  | 15,19 |
| 1076,4674 |  | 280,24 | 27,23 |
| 1077,5091 |  | 115,6  | 11,23 |
| 1077,6064 |  | 161    | 15,65 |
| 1079,5867 |  | 150,17 | 14,59 |
| 1080,9869 |  | 137,65 | 13,38 |
| 1081,9776 |  | 236,75 | 23,01 |
| 1082,4892 |  | 215,83 | 20,98 |
| 1082,7151 |  | 118,38 | 11,5  |
| 1083,9866 |  | 136,4  | 13,26 |
| 1084,4306 |  | 146,58 | 14,24 |
| 1084,5626 |  | 117,28 | 11,4  |
| 1085,4823 |  | 136,18 | 13,23 |
| 1088,5153 |  | 156,03 | 15,16 |
| 1089,4993 |  | 138,86 | 13,5  |
| 1091,5198 |  | 169,13 | 16,44 |
| 1092,4592 |  | 114,83 | 11,16 |
| 1100,1518 |  | 198,51 | 19,29 |
| 1100,6055 |  | 160,91 | 15,64 |
| 1102,6682 |  | 212,71 | 20,67 |
| 1103,0902 |  | 172,03 | 16,72 |
| 1103,772  |  | 158,42 | 15,4  |
| 1104,0521 |  | 251,67 | 24,46 |
| 1104,6041 |  | 195,44 | 18,99 |
| 1105,6917 |  | 137,69 | 13,38 |
| 1105,9846 |  | 367,57 | 35,72 |
| 1109,9982 |  | 239,3  | 23,26 |
| 1110,3555 |  | 101,97 | 9,91  |
| 1110,4808 |  | 230,18 | 22,37 |
| 1110,6475 |  | 100,53 | 9,77  |
| 1110,9282 |  | 102,57 | 9,97  |
| 1111,486  |  | 141,05 | 13,71 |
| 1112,4603 |  | 200,84 | 19,52 |
| 1112,945  |  | 181,89 | 17,68 |
| 1113,4678 |  | 187,94 | 18,26 |
| 1113,5394 |  | 105,44 | 10,25 |
| 1119,5    |  | 270,13 | 26,25 |
| 1120,498  |  | 150,6  | 14,64 |
| 1124,5183 |  | 233,45 | 22,69 |
| 1130,4534 |  | 180,99 | 17,59 |
| 1131,0502 |  | 138,74 | 13,48 |
| 1131,1421 |  | 107,45 | 10,44 |
| 1131,6931 |  | 171,94 | 16,71 |
| 1132,0709 |  | 230,26 | 22,38 |
| 1132,284  |  | 223,67 | 21,74 |
| 1132,8559 |  | 102,35 | 9,95  |

|           |  |        |       |
|-----------|--|--------|-------|
| 1133,035  |  | 262,43 | 25,5  |
| 1133,5048 |  | 227,13 | 22,07 |
| 1134,0053 |  | 371,76 | 36,13 |
| 1134,2597 |  | 114,93 | 11,17 |
| 1134,4565 |  | 104,34 | 10,14 |
| 1134,6043 |  | 163,83 | 15,92 |
| 1138,4852 |  | 116,77 | 11,35 |
| 1138,9684 |  | 274,6  | 26,69 |
| 1139,4111 |  | 199,63 | 19,4  |
| 1139,4787 |  | 163,25 | 15,87 |
| 1139,958  |  | 202,29 | 19,66 |
| 1140,0653 |  | 111,61 | 10,85 |
| 1140,4774 |  | 158,51 | 15,4  |
| 1141,4752 |  | 140,55 | 13,66 |
| 1141,9262 |  | 163,64 | 15,9  |
| 1142,4381 |  | 253,46 | 24,63 |
| 1142,5065 |  | 133,31 | 12,96 |
| 1142,9034 |  | 113,18 | 11    |
| 1149,494  |  | 123,41 | 11,99 |
| 1157,5666 |  | 178,76 | 17,37 |
| 1159,0974 |  | 306,63 | 29,8  |
| 1160,0474 |  | 213,07 | 20,71 |
| 1160,169  |  | 145,03 | 14,09 |
| 1160,5518 |  | 149,16 | 14,5  |
| 1161,0555 |  | 314,1  | 30,53 |
| 1162,0574 |  | 112,62 | 10,94 |
| 1162,5751 |  | 168,85 | 16,41 |
| 1163,013  |  | 323,4  | 31,43 |
| 1163,4683 |  | 582,05 | 56,57 |
| 1166,4673 |  | 104,13 | 10,12 |
| 1167,9689 |  | 215,73 | 20,97 |
| 1168,4394 |  | 201,08 | 19,54 |
| 1169,4317 |  | 284,73 | 27,67 |
| 1169,919  |  | 127,33 | 12,37 |
| 1170,4389 |  | 130,89 | 12,72 |
| 1171,3951 |  | 162,48 | 15,79 |
| 1177,4779 |  | 163,3  | 15,87 |
| 1178,439  |  | 117,26 | 11,4  |
| 1179,4736 |  | 330,39 | 32,11 |
| 1180,4601 |  | 155,16 | 15,08 |
| 1182,4205 |  | 115,71 | 11,24 |
| 1186,6077 |  | 105,78 | 10,28 |
| 1187,0562 |  | 435,87 | 42,36 |
| 1188,1416 |  | 103,04 | 10,01 |
| 1188,532  |  | 195,49 | 19    |
| 1191,4598 |  | 148,57 | 14,44 |
| 1191,7498 |  | 128,78 | 12,52 |
| 1191,9761 |  | 394,06 | 38,3  |
| 1192,9035 |  | 120,36 | 11,7  |
| 1193,407  |  | 158,99 | 15,45 |
| 1196,9392 |  | 146,91 | 14,28 |
| 1197,427  |  | 345,76 | 33,6  |
| 1197,5168 |  | 171,72 | 16,69 |
| 1197,9156 |  | 169,97 | 16,52 |

|           |  |        |       |
|-----------|--|--------|-------|
| 1198,4149 |  | 160,39 | 15,59 |
| 1199,3812 |  | 185,06 | 17,98 |
| 1199,9413 |  | 126,84 | 12,33 |
| 1200,387  |  | 163,67 | 15,91 |
| 1200,4785 |  | 138,48 | 13,46 |
| 1216,0297 |  | 387    | 37,61 |
| 1216,5828 |  | 221,16 | 21,49 |
| 1218,0228 |  | 212,23 | 20,63 |
| 1218,4492 |  | 164,28 | 15,97 |
| 1218,5655 |  | 189,94 | 18,46 |
| 1219,063  |  | 119,58 | 11,62 |
| 1219,936  |  | 106,46 | 10,35 |
| 1221,4846 |  | 207,49 | 20,16 |
| 1225,8722 |  | 174,24 | 16,93 |
| 1226,4168 |  | 212,41 | 20,64 |
| 1227,4242 |  | 154,64 | 15,03 |
| 1229,403  |  | 257,51 | 25,03 |
| 1235,3632 |  | 104,65 | 10,17 |
| 1236,4139 |  | 157,85 | 15,34 |
| 1237,4021 |  | 121,6  | 11,82 |
| 1247,0191 |  | 187,31 | 18,2  |
| 1249,4899 |  | 170,53 | 16,57 |
| 1250,0304 |  | 160,95 | 15,64 |
| 1250,8697 |  | 167,58 | 16,29 |
| 1253,4421 |  | 148,42 | 14,42 |
| 1254,5044 |  | 111,51 | 10,84 |
| 1254,9171 |  | 116,36 | 11,31 |
| 1255,3955 |  | 279,13 | 27,13 |
| 1255,9092 |  | 222,68 | 21,64 |
| 1256,1011 |  | 119,1  | 11,57 |
| 1256,3674 |  | 135,06 | 13,13 |
| 1257,3963 |  | 195,13 | 18,96 |
| 1258,3774 |  | 107,67 | 10,46 |
| 1259,408  |  | 145,45 | 14,14 |
| 1274,566  |  | 211,45 | 20,55 |
| 1275,0239 |  | 144,39 | 14,03 |
| 1276,5985 |  | 151,93 | 14,77 |
| 1276,9187 |  | 145,96 | 14,18 |
| 1280,4309 |  | 112,08 | 10,89 |
| 1283,9302 |  | 106,03 | 10,3  |
| 1284,379  |  | 172,69 | 16,78 |
| 1284,4391 |  | 110,29 | 10,72 |
| 1284,8838 |  | 151,44 | 14,72 |
| 1302,5093 |  | 164,87 | 16,02 |
| 1303,4937 |  | 210,13 | 20,42 |
| 1304,3725 |  | 144,99 | 14,09 |
| 1305,4896 |  | 247,35 | 24,04 |
| 1305,9622 |  | 230,43 | 22,39 |
| 1306,127  |  | 100,17 | 9,73  |
| 1307,3527 |  | 190,19 | 18,48 |
| 1308,3612 |  | 174,97 | 17    |
| 1313,4081 |  | 144,21 | 14,01 |
| 1313,863  |  | 139,57 | 13,56 |
| 1331,3796 |  | 340,02 | 33,04 |

|           |  |        |       |
|-----------|--|--------|-------|
| 1332,4914 |  | 218,85 | 21,27 |
| 1333,3683 |  | 151,62 | 14,73 |
| 1334,4361 |  | 132,28 | 12,86 |
| 1334,5253 |  | 177,77 | 17,28 |
| 1334,976  |  | 192,01 | 18,66 |
| 1335,4096 |  | 228,02 | 22,16 |
| 1336,8388 |  | 121,82 | 11,84 |
| 1342,3788 |  | 100    | 9,72  |
| 1360,462  |  | 158,79 | 15,43 |
| 1360,9111 |  | 182,01 | 17,69 |
| 1361,9189 |  | 116,31 | 11,3  |
| 1362,8356 |  | 139,39 | 13,55 |
| 1364,3737 |  | 143,01 | 13,9  |
| 1366,3308 |  | 196,7  | 19,12 |
| 1390,4376 |  | 242,41 | 23,56 |
| 1393,4102 |  | 183,76 | 17,86 |
| 1394,8137 |  | 106,08 | 10,31 |
| 1418,359  |  | 108,8  | 10,57 |
| 1422,3125 |  | 208,62 | 20,27 |
| 1477,328  |  | 109,86 | 10,68 |
| 1479,3353 |  | 112,19 | 10,9  |
| 1491,2927 |  | 115,36 | 11,21 |
| 1492,3343 |  | 107,86 | 10,48 |

This report was created by ACD/NMR Processor Academic Edition. For more information go to [www.acdlabs.com/nmrproc/](http://www.acdlabs.com/nmrproc/)

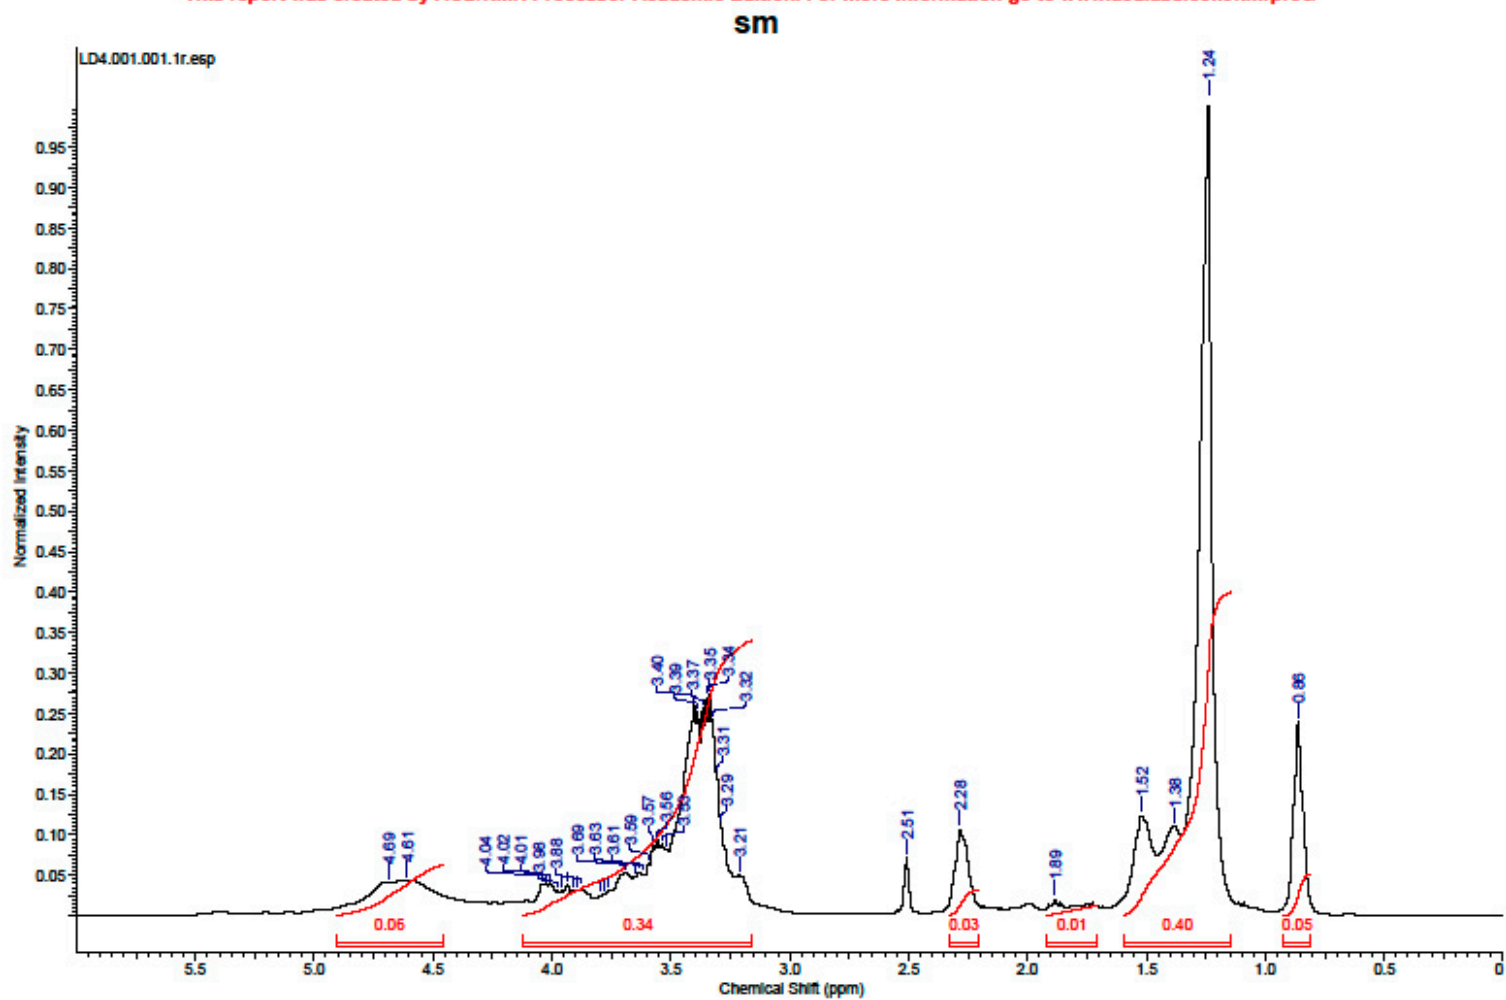

*Esters 17b (Polyglycerol + epoxidized soybean oil)*

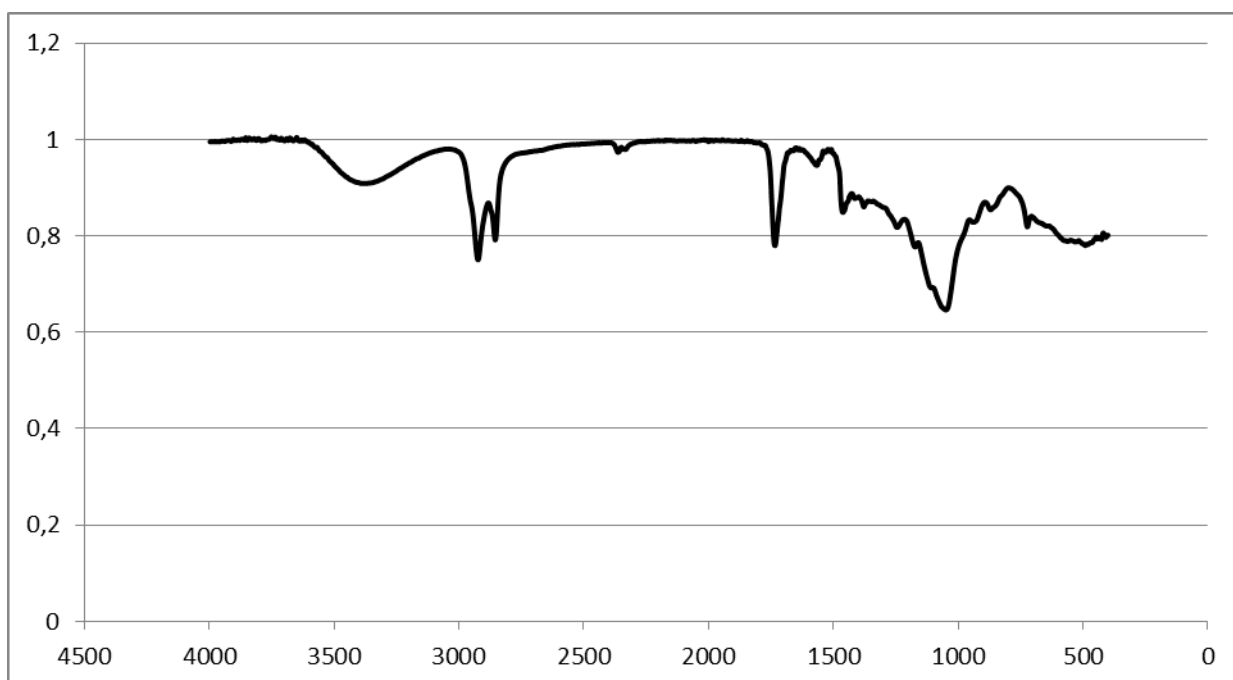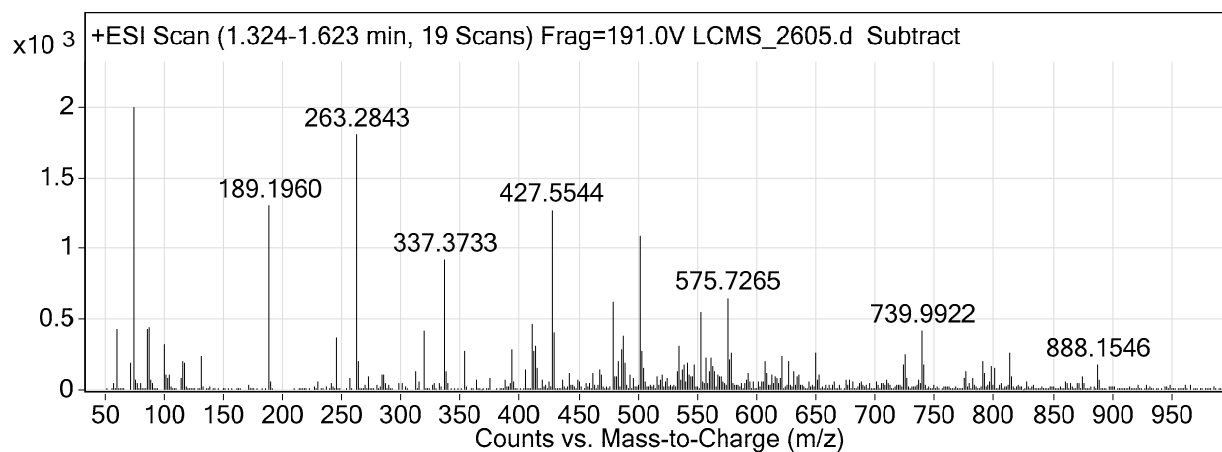

| m/z      | Species | Abund   | Abund % |
|----------|---------|---------|---------|
| 59,1312  |         | 111,99  | 5,53    |
| 60,098   |         | 111,91  | 5,53    |
| 61,0712  |         | 161,16  | 7,96    |
| 69,0887  |         | 117,68  | 5,82    |
| 72,1216  |         | 205,68  | 10,16   |
| 74,0811  |         | 1348,57 | 66,64   |
| 80,087   |         | 164,06  | 8,11    |
| 94,1088  |         | 100,84  | 4,98    |
| 100,1591 |         | 2023,6  | 100     |
| 100,2251 |         | 125,01  | 6,18    |
| 100,2512 |         | 119,36  | 5,9     |
| 101,1619 |         | 286,46  | 14,16   |
| 102,1752 |         | 152,69  | 7,55    |
| 114,1801 |         | 201,43  | 9,95    |
| 114,1848 |         | 158,9   | 7,85    |
| 139,166  |         | 103,59  | 5,12    |
| 142,3029 |         | 180,46  | 8,92    |

|          |  |        |       |
|----------|--|--------|-------|
| 143,0458 |  | 186,59 | 9,22  |
| 156,2422 |  | 129,72 | 6,41  |
| 214,3095 |  | 127,63 | 6,31  |
| 230,3093 |  | 275,52 | 13,62 |
| 230,3397 |  | 113,61 | 5,61  |
| 263,3086 |  | 142,84 | 7,06  |
| 274,3496 |  | 163,25 | 8,07  |
| 277,2893 |  | 283,56 | 14,01 |
| 279,3044 |  | 147,47 | 7,29  |
| 281,3266 |  | 459,62 | 22,71 |
| 281,3584 |  | 193,47 | 9,56  |
| 295,3075 |  | 421,62 | 20,84 |
| 295,3385 |  | 193,87 | 9,58  |
| 309,322  |  | 183,44 | 9,06  |
| 313,3518 |  | 320,73 | 15,85 |
| 327,3421 |  | 473,94 | 23,42 |
| 327,3751 |  | 185,62 | 9,17  |
| 328,3428 |  | 106,88 | 5,28  |
| 331,3704 |  | 272,26 | 13,45 |
| 345,3575 |  | 405,48 | 20,04 |
| 345,3985 |  | 185,71 | 9,18  |
| 351,3382 |  | 122,32 | 6,04  |
| 353,3589 |  | 208,86 | 10,32 |
| 355,3806 |  | 307,71 | 15,21 |
| 355,4174 |  | 120,57 | 5,96  |
| 362,3883 |  | 160,9  | 7,95  |
| 367,3449 |  | 510,43 | 25,22 |
| 367,3784 |  | 213,46 | 10,55 |
| 368,3499 |  | 122,99 | 6,08  |
| 369,3627 |  | 244,49 | 12,08 |
| 371,3758 |  | 102,78 | 5,08  |
| 373,3989 |  | 299,76 | 14,81 |
| 387,3794 |  | 224,9  | 11,11 |
| 387,3993 |  | 103,45 | 5,11  |
| 390,4265 |  | 235,1  | 11,62 |
| 391,4002 |  | 163,51 | 8,08  |
| 391,4155 |  | 149,2  | 7,37  |
| 391,4432 |  | 108,65 | 5,37  |
| 405,3935 |  | 593,24 | 29,32 |
| 405,4345 |  | 262,95 | 12,99 |
| 406,3968 |  | 165,82 | 8,19  |
| 406,4376 |  | 139,64 | 6,9   |
| 408,4398 |  | 128,14 | 6,33  |
| 422,4331 |  | 349    | 17,25 |
| 422,474  |  | 132,98 | 6,57  |
| 427,3836 |  | 393,32 | 19,44 |
| 427,4216 |  | 142,61 | 7,05  |
| 429,4334 |  | 178,58 | 8,83  |
| 443,4194 |  | 103,14 | 5,1   |
| 444,482  |  | 158,66 | 7,84  |
| 446,4617 |  | 122,58 | 6,06  |
| 447,4529 |  | 200,35 | 9,9   |
| 461,4395 |  | 259,97 | 12,85 |
| 461,4809 |  | 116,17 | 5,74  |

|          |  |        |       |
|----------|--|--------|-------|
| 464,4877 |  | 269,59 | 13,32 |
| 465,469  |  | 107,45 | 5,31  |
| 469,4301 |  | 122,17 | 6,04  |
| 478,47   |  | 140,21 | 6,93  |
| 478,4994 |  | 109,47 | 5,41  |
| 479,4569 |  | 350,2  | 17,31 |
| 479,5022 |  | 123,77 | 6,12  |
| 483,4223 |  | 303,52 | 15    |
| 483,4656 |  | 134,01 | 6,62  |
| 496,4827 |  | 205,67 | 10,16 |
| 496,5287 |  | 152,42 | 7,53  |
| 553,5302 |  | 144,63 | 7,15  |
| 557,4867 |  | 162,54 | 8,03  |
| 570,5334 |  | 103,41 | 5,11  |
| 600,6812 |  | 147,28 | 7,28  |
| 625,6631 |  | 129,44 | 6,4   |
| 626,6866 |  | 168,06 | 8,31  |
| 628,7101 |  | 320,02 | 15,81 |
| 629,695  |  | 204,23 | 10,09 |
| 642,6997 |  | 392,56 | 19,4  |
| 642,7512 |  | 208,05 | 10,28 |
| 643,6694 |  | 112,71 | 5,57  |
| 643,7001 |  | 271,41 | 13,41 |
| 644,7    |  | 246,6  | 12,19 |
| 646,7383 |  | 171,78 | 8,49  |
| 647,6491 |  | 148,72 | 7,35  |
| 647,6901 |  | 121,92 | 6,02  |
| 648,6595 |  | 101,84 | 5,03  |
| 657,6746 |  | 167,1  | 8,26  |
| 658,7002 |  | 115,2  | 5,69  |
| 660,7245 |  | 470,56 | 23,25 |
| 661,708  |  | 249,11 | 12,31 |
| 663,6652 |  | 100,39 | 4,96  |
| 665,6782 |  | 372,67 | 18,42 |
| 666,6763 |  | 126,87 | 6,27  |
| 670,7376 |  | 103,18 | 5,1   |
| 671,7325 |  | 109,42 | 5,41  |
| 674,6988 |  | 230,7  | 11,4  |
| 674,7473 |  | 225,82 | 11,16 |
| 675,7111 |  | 128,12 | 6,33  |
| 679,6563 |  | 237,35 | 11,73 |
| 679,6983 |  | 135,06 | 6,67  |
| 680,6719 |  | 141,98 | 7,02  |
| 685,7163 |  | 162,23 | 8,02  |
| 686,7318 |  | 110,57 | 5,46  |
| 688,76   |  | 305,77 | 15,11 |
| 702,7516 |  | 449,08 | 22,19 |
| 703,7441 |  | 303,4  | 14,99 |
| 703,7976 |  | 118,6  | 5,86  |
| 707,7124 |  | 157,86 | 7,8   |
| 708,7052 |  | 124,27 | 6,14  |
| 716,7404 |  | 185,48 | 9,17  |
| 716,7876 |  | 159,62 | 7,89  |
| 717,7372 |  | 228,75 | 11,3  |

|           |  |        |       |
|-----------|--|--------|-------|
| 717,8121  |  | 118,51 | 5,86  |
| 718,7383  |  | 206,36 | 10,2  |
| 720,7647  |  | 368,3  | 18,2  |
| 721,7076  |  | 122,38 | 6,05  |
| 721,7544  |  | 182,82 | 9,03  |
| 723,7517  |  | 132,93 | 6,57  |
| 724,7793  |  | 107,95 | 5,33  |
| 725,7152  |  | 160,36 | 7,92  |
| 734,7373  |  | 232,16 | 11,47 |
| 734,7688  |  | 312,13 | 15,42 |
| 735,7531  |  | 264,26 | 13,06 |
| 739,6968  |  | 170,51 | 8,43  |
| 739,7319  |  | 221,15 | 10,93 |
| 740,7307  |  | 142,14 | 7,02  |
| 741,7046  |  | 126,68 | 6,26  |
| 744,8258  |  | 117,7  | 5,82  |
| 756,8109  |  | 125,1  | 6,18  |
| 758,7841  |  | 183,66 | 9,08  |
| 759,7762  |  | 177,43 | 8,77  |
| 760,802   |  | 131,69 | 6,51  |
| 762,8082  |  | 165,58 | 8,18  |
| 763,7447  |  | 141,02 | 6,97  |
| 776,8114  |  | 390,06 | 19,28 |
| 777,7982  |  | 188,22 | 9,3   |
| 781,7619  |  | 154,31 | 7,63  |
| 790,7919  |  | 187,52 | 9,27  |
| 791,7911  |  | 159,31 | 7,87  |
| 792,7822  |  | 111,96 | 5,53  |
| 794,824   |  | 153,99 | 7,61  |
| 795,7572  |  | 174,32 | 8,61  |
| 808,8002  |  | 144,09 | 7,12  |
| 808,8415  |  | 104,54 | 5,17  |
| 809,8005  |  | 107,72 | 5,32  |
| 941,0165  |  | 164,7  | 8,14  |
| 955,9995  |  | 103,5  | 5,11  |
| 960,0018  |  | 116,43 | 5,75  |
| 973,0389  |  | 157,82 | 7,8   |
| 977,9939  |  | 114,86 | 5,68  |
| 1001,1125 |  | 103,31 | 5,11  |
| 1002,0658 |  | 114,14 | 5,64  |
| 1015,0474 |  | 175,94 | 8,69  |
| 1015,0971 |  | 127,64 | 6,31  |
| 1020,029  |  | 109,29 | 5,4   |
| 1033,0802 |  | 158,71 | 7,84  |
| 1034,076  |  | 157,11 | 7,76  |
| 1047,0687 |  | 193,89 | 9,58  |
| 1047,133  |  | 119,83 | 5,92  |
| 1048,0728 |  | 128,13 | 6,33  |
| 1089,1144 |  | 104,34 | 5,16  |

This report was created by ACD/NMR Processor Academic Edition. For more information go to [www.acdlabs.com/nmrproc/](http://www.acdlabs.com/nmrproc/)

sm

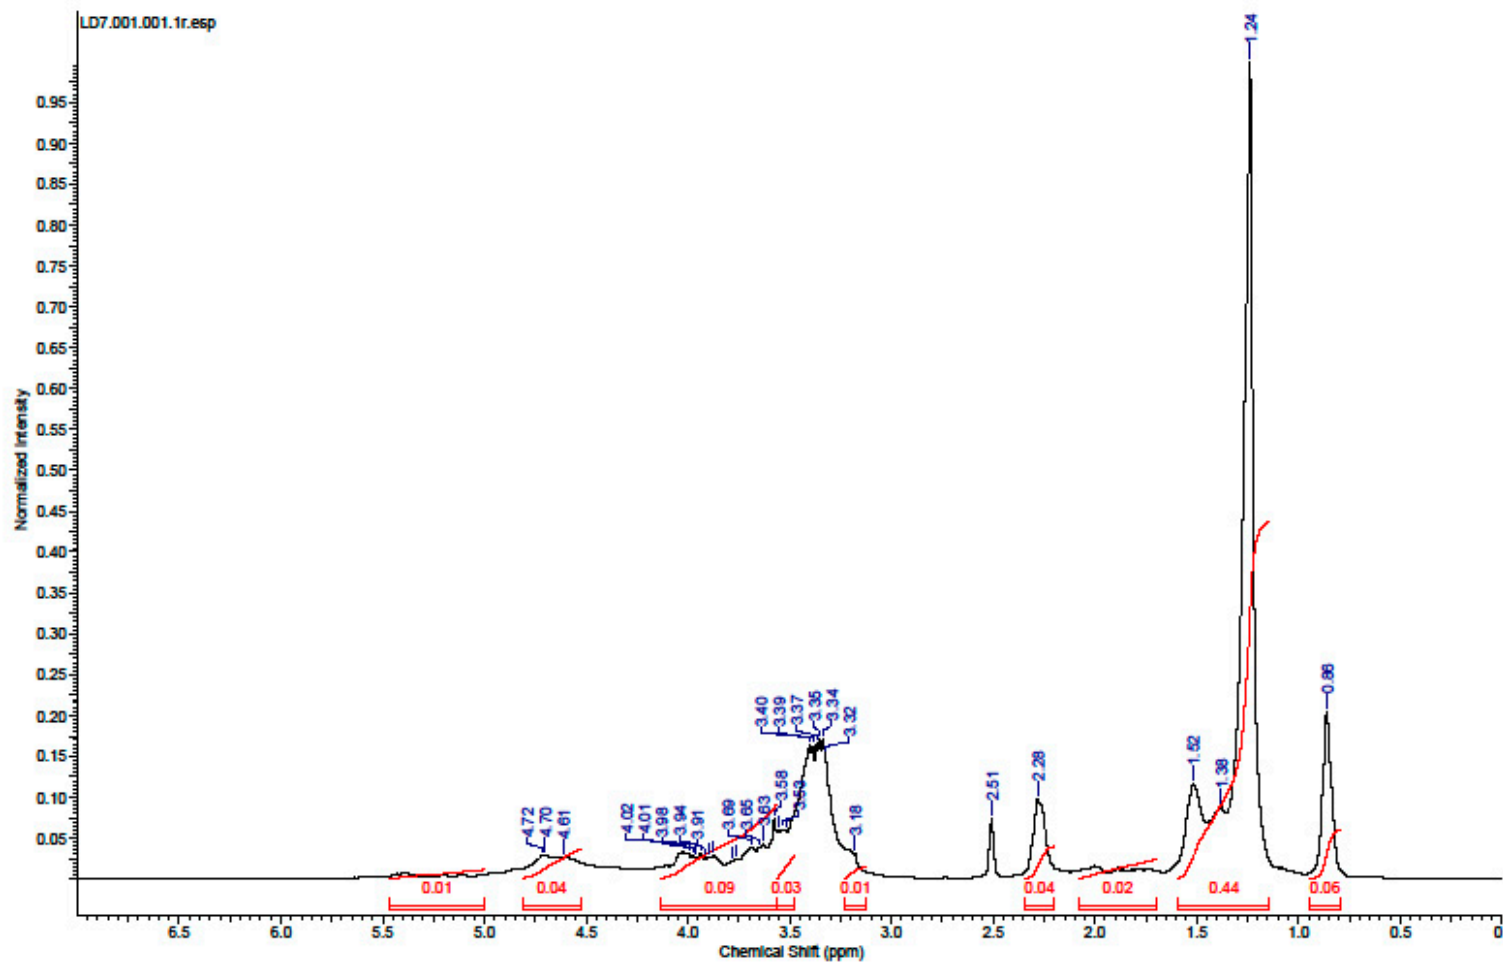

*Esters 18a (Polyglycerol + epoxidized sunflower oil FAME)*

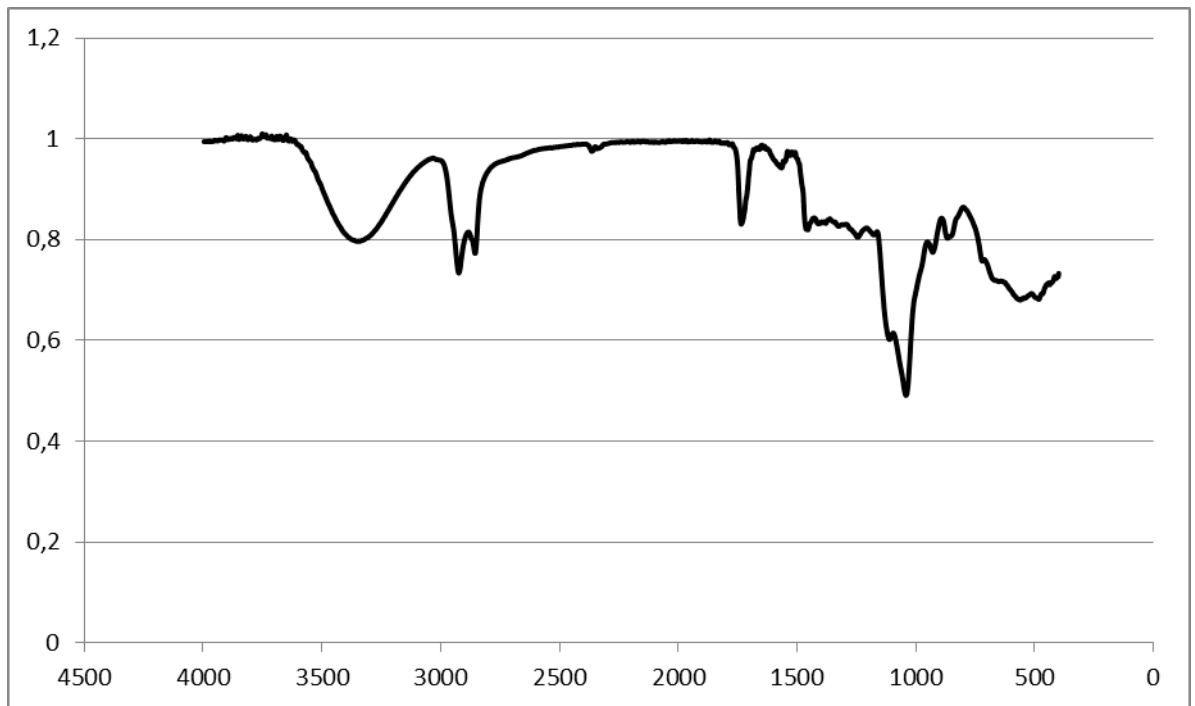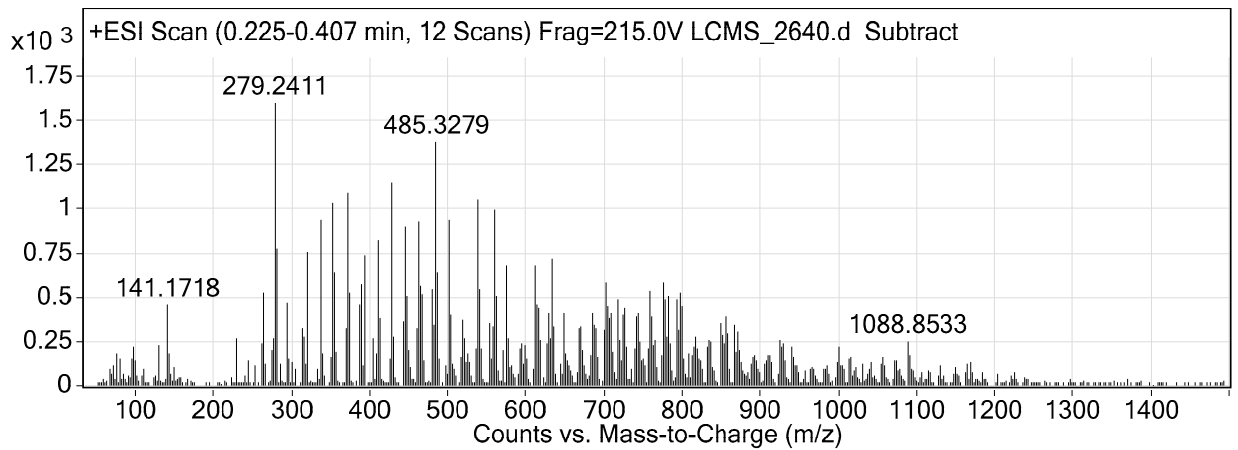

| m/z      | Species | Abund  | Abund % |
|----------|---------|--------|---------|
| 72,1035  |         | 116,97 | 7,32    |
| 75,0467  |         | 177,39 | 11,1    |
| 81,0688  |         | 151,97 | 9,51    |
| 95,087   |         | 151,8  | 9,5     |
| 97,0948  |         | 221,37 | 13,85   |
| 100,1952 |         | 144,33 | 9,03    |
| 131,075  |         | 232,91 | 14,57   |
| 141,1718 |         | 455,63 | 28,5    |
| 142,2359 |         | 153,25 | 9,59    |
| 142,2522 |         | 183,91 | 11,5    |
| 142,2932 |         | 180,55 | 11,29   |
| 142,3031 |         | 172,11 | 10,77   |
| 142,3998 |         | 131,73 | 8,24    |
| 142,4141 |         | 110,19 | 6,89    |
| 149,0802 |         | 108,98 | 6,82    |

|          |  |         |       |
|----------|--|---------|-------|
| 230,2521 |  | 271,41  | 16,98 |
| 245,104  |  | 138,8   | 8,68  |
| 253,2592 |  | 110,68  | 6,92  |
| 261,2266 |  | 238,67  | 14,93 |
| 263,1181 |  | 521,63  | 32,63 |
| 263,1525 |  | 259,8   | 16,25 |
| 263,2436 |  | 259,43  | 16,23 |
| 263,2736 |  | 172,74  | 10,81 |
| 265,2581 |  | 122,43  | 7,66  |
| 274,2816 |  | 199,7   | 12,49 |
| 277,2229 |  | 272,45  | 17,04 |
| 279,2411 |  | 1598,56 | 100   |
| 279,2739 |  | 242,25  | 15,15 |
| 280,2441 |  | 219,68  | 13,74 |
| 280,2612 |  | 164,62  | 10,3  |
| 281,2563 |  | 776,97  | 48,6  |
| 281,2911 |  | 322,41  | 20,17 |
| 282,3212 |  | 550,52  | 34,44 |
| 285,3795 |  | 128,19  | 8,02  |
| 295,2346 |  | 465,36  | 29,11 |
| 295,2709 |  | 108,39  | 6,78  |
| 297,2492 |  | 155,86  | 9,75  |
| 301,1351 |  | 136,28  | 8,53  |
| 313,2806 |  | 321,19  | 20,09 |
| 315,1787 |  | 273,82  | 17,13 |
| 315,2077 |  | 105,26  | 6,58  |
| 318,3066 |  | 128,09  | 8,01  |
| 319,1478 |  | 756,6   | 47,33 |
| 319,1822 |  | 265,02  | 16,58 |
| 337,1574 |  | 940,64  | 58,84 |
| 337,1953 |  | 506,36  | 31,68 |
| 337,2783 |  | 382,41  | 23,92 |
| 337,3215 |  | 206,66  | 12,93 |
| 339,2969 |  | 186,33  | 11,66 |
| 351,2614 |  | 158,66  | 9,93  |
| 353,1277 |  | 144,17  | 9,02  |
| 353,2807 |  | 1030,55 | 64,47 |
| 353,3209 |  | 347,16  | 21,72 |
| 354,2778 |  | 281,29  | 17,6  |
| 355,297  |  | 641,39  | 40,12 |
| 355,3312 |  | 184,26  | 11,53 |
| 356,3003 |  | 188,04  | 11,76 |
| 369,2792 |  | 326,93  | 20,45 |
| 371,2042 |  | 141,82  | 8,87  |
| 371,2925 |  | 1088,29 | 68,08 |
| 371,3297 |  | 214,8   | 13,44 |
| 372,2932 |  | 240,16  | 15,02 |
| 373,3079 |  | 523,45  | 32,74 |
| 373,3478 |  | 139,79  | 8,74  |
| 375,1704 |  | 183,7   | 11,49 |
| 387,2877 |  | 285,44  | 17,86 |
| 387,3128 |  | 463,01  | 28,96 |
| 389,2163 |  | 576,43  | 36,06 |
| 389,2971 |  | 260,83  | 16,32 |

|          |  |         |       |
|----------|--|---------|-------|
| 391,3139 |  | 117,44  | 7,35  |
| 393,1904 |  | 739,37  | 46,25 |
| 393,2288 |  | 264,65  | 16,56 |
| 394,1891 |  | 107,3   | 6,71  |
| 405,2999 |  | 150,22  | 9,4   |
| 405,3345 |  | 264,45  | 16,54 |
| 409,305  |  | 184,83  | 11,56 |
| 409,3438 |  | 106,98  | 6,69  |
| 411,1993 |  | 799,13  | 49,99 |
| 411,2807 |  | 411,42  | 25,74 |
| 411,3152 |  | 823,74  | 51,53 |
| 411,3723 |  | 135,09  | 8,45  |
| 412,1997 |  | 126,1   | 7,89  |
| 412,2893 |  | 187,55  | 11,73 |
| 412,3334 |  | 159,63  | 9,99  |
| 413,2992 |  | 382,44  | 23,92 |
| 413,3348 |  | 290,97  | 18,2  |
| 427,1689 |  | 153,16  | 9,58  |
| 427,3167 |  | 1151,13 | 72,01 |
| 427,3615 |  | 214,52  | 13,42 |
| 428,3193 |  | 358,62  | 22,43 |
| 429,3354 |  | 730,72  | 45,71 |
| 429,3773 |  | 274,03  | 17,14 |
| 430,3366 |  | 200,28  | 12,53 |
| 431,3484 |  | 200,81  | 12,56 |
| 443,3191 |  | 362,63  | 22,68 |
| 445,2411 |  | 129,45  | 8,1   |
| 445,3332 |  | 894,95  | 55,98 |
| 445,3765 |  | 133,99  | 8,38  |
| 446,3387 |  | 284,82  | 17,82 |
| 447,3499 |  | 507,01  | 31,72 |
| 447,3889 |  | 130,47  | 8,16  |
| 448,3684 |  | 131,77  | 8,24  |
| 449,2165 |  | 198,82  | 12,44 |
| 451,3215 |  | 109,7   | 6,86  |
| 461,3285 |  | 326,1   | 20,4  |
| 461,362  |  | 280,11  | 17,52 |
| 462,3508 |  | 153,28  | 9,59  |
| 463,2541 |  | 413,37  | 25,86 |
| 463,3455 |  | 924,35  | 57,82 |
| 463,3858 |  | 246,04  | 15,39 |
| 464,3473 |  | 274,13  | 17,15 |
| 464,3905 |  | 149,81  | 9,37  |
| 465,3569 |  | 563,46  | 35,25 |
| 465,3943 |  | 179,03  | 11,2  |
| 466,3565 |  | 123,49  | 7,73  |
| 467,2242 |  | 514,75  | 32,2  |
| 467,3049 |  | 469,91  | 29,4  |
| 467,3548 |  | 260,12  | 16,27 |
| 468,3084 |  | 142,51  | 8,91  |
| 469,3234 |  | 137,37  | 8,59  |
| 479,344  |  | 540,39  | 33,8  |
| 479,3818 |  | 356,47  | 22,3  |
| 480,351  |  | 200,19  | 12,52 |

|          |  |         |       |
|----------|--|---------|-------|
| 483,339  |  | 340,55  | 21,3  |
| 485,2359 |  | 491,18  | 30,73 |
| 485,3279 |  | 1377,11 | 86,15 |
| 485,3617 |  | 465,54  | 29,12 |
| 486,3333 |  | 449,69  | 28,13 |
| 487,3417 |  | 640,28  | 40,05 |
| 487,3788 |  | 254,98  | 15,95 |
| 488,3418 |  | 150,39  | 9,41  |
| 489,3896 |  | 107,22  | 6,71  |
| 496,3807 |  | 114,98  | 7,19  |
| 501,3172 |  | 140,9   | 8,81  |
| 501,3432 |  | 941,34  | 58,89 |
| 502,3605 |  | 305,1   | 19,09 |
| 503,3737 |  | 405,39  | 25,36 |
| 503,4155 |  | 148,68  | 9,3   |
| 504,3797 |  | 113,97  | 7,13  |
| 505,3877 |  | 119,87  | 7,5   |
| 517,3459 |  | 167,12  | 10,45 |
| 519,3646 |  | 376,16  | 23,53 |
| 519,423  |  | 137,46  | 8,6   |
| 520,3958 |  | 255,27  | 15,97 |
| 521,3872 |  | 265,94  | 16,64 |
| 521,4269 |  | 118,1   | 7,39  |
| 522,4113 |  | 137,25  | 8,59  |
| 523,2506 |  | 130,57  | 8,17  |
| 525,3547 |  | 179,09  | 11,2  |
| 527,3666 |  | 133,5   | 8,35  |
| 527,4077 |  | 104,76  | 6,55  |
| 535,38   |  | 166,34  | 10,41 |
| 536,392  |  | 147     | 9,2   |
| 537,2914 |  | 210,24  | 13,15 |
| 537,383  |  | 1056,11 | 66,07 |
| 537,4267 |  | 101,13  | 6,33  |
| 538,3906 |  | 333,86  | 20,89 |
| 538,449  |  | 100,03  | 6,26  |
| 539,3974 |  | 691,88  | 43,28 |
| 539,4385 |  | 239,65  | 14,99 |
| 540,3996 |  | 211,89  | 13,25 |
| 541,2632 |  | 263,77  | 16,5  |
| 541,3522 |  | 549,15  | 34,35 |
| 541,3984 |  | 134,82  | 8,43  |
| 542,3515 |  | 158,95  | 9,94  |
| 543,3622 |  | 206,68  | 12,93 |
| 543,4099 |  | 162,86  | 10,19 |
| 553,3784 |  | 349,19  | 21,84 |
| 553,4123 |  | 268     | 16,76 |
| 554,399  |  | 323,68  | 20,25 |
| 555,3974 |  | 111,64  | 6,98  |
| 556,4249 |  | 153,19  | 9,58  |
| 557,361  |  | 336,5   | 21,05 |
| 557,3977 |  | 120,92  | 7,56  |
| 559,2768 |  | 285,04  | 17,83 |
| 559,3665 |  | 999,15  | 62,5  |
| 559,4144 |  | 279,02  | 17,45 |

|          |  |        |       |
|----------|--|--------|-------|
| 560,3688 |  | 310,36 | 19,41 |
| 561,3813 |  | 510,44 | 31,93 |
| 561,424  |  | 133,46 | 8,35  |
| 562,4265 |  | 143,34 | 8,97  |
| 570,4218 |  | 199,84 | 12,5  |
| 575,3719 |  | 682,93 | 42,72 |
| 576,4077 |  | 263,79 | 16,5  |
| 577,4056 |  | 212,19 | 13,27 |
| 579,4305 |  | 105,69 | 6,61  |
| 581,399  |  | 118,94 | 7,44  |
| 593,3965 |  | 211,3  | 13,22 |
| 593,4909 |  | 139,93 | 8,75  |
| 594,444  |  | 243,44 | 15,23 |
| 595,5117 |  | 141,64 | 8,86  |
| 596,4516 |  | 125,96 | 7,88  |
| 599,3979 |  | 227,05 | 14,2  |
| 601,4106 |  | 152,44 | 9,54  |
| 609,5172 |  | 100,06 | 6,26  |
| 611,4219 |  | 676,26 | 42,3  |
| 611,4887 |  | 261,7  | 16,37 |
| 612,4435 |  | 169,99 | 10,63 |
| 613,434  |  | 456,43 | 28,55 |
| 613,5009 |  | 151,69 | 9,49  |
| 615,3051 |  | 157,22 | 9,83  |
| 615,3926 |  | 443,5  | 27,74 |
| 615,4358 |  | 102,77 | 6,43  |
| 617,4161 |  | 258,86 | 16,19 |
| 627,4284 |  | 237,41 | 14,85 |
| 628,4426 |  | 406,75 | 25,45 |
| 628,4895 |  | 126,38 | 7,91  |
| 629,4495 |  | 132,24 | 8,27  |
| 631,4174 |  | 267,78 | 16,75 |
| 632,4074 |  | 137,62 | 8,61  |
| 633,4054 |  | 716,99 | 44,85 |
| 633,5069 |  | 240,67 | 15,06 |
| 634,4062 |  | 205,5  | 12,86 |
| 634,4629 |  | 157,66 | 9,86  |
| 635,4206 |  | 339,38 | 21,23 |
| 635,5258 |  | 186,29 | 11,65 |
| 636,422  |  | 136,34 | 8,53  |
| 644,4428 |  | 124,53 | 7,79  |
| 644,5118 |  | 107,43 | 6,72  |
| 644,5574 |  | 106,55 | 6,67  |
| 649,4042 |  | 408,96 | 25,58 |
| 649,5129 |  | 192,97 | 12,07 |
| 650,4154 |  | 165,93 | 10,38 |
| 650,4876 |  | 121,28 | 7,59  |
| 651,4751 |  | 115,28 | 7,21  |
| 651,5397 |  | 180,08 | 11,27 |
| 653,5513 |  | 147,52 | 9,23  |
| 655,42   |  | 112,46 | 7,04  |
| 667,4431 |  | 109,27 | 6,84  |
| 667,5377 |  | 326,23 | 20,41 |
| 668,5439 |  | 285,67 | 17,87 |

|          |  |        |       |
|----------|--|--------|-------|
| 668,6004 |  | 134,86 | 8,44  |
| 669,5572 |  | 333,92 | 20,89 |
| 670,5669 |  | 307,3  | 19,22 |
| 670,62   |  | 117,73 | 7,36  |
| 671,5748 |  | 198,33 | 12,41 |
| 672,5899 |  | 171,95 | 10,76 |
| 673,4389 |  | 134,39 | 8,41  |
| 675,4435 |  | 108,03 | 6,76  |
| 675,521  |  | 117,83 | 7,37  |
| 683,5477 |  | 174,48 | 10,91 |
| 684,5502 |  | 209,92 | 13,13 |
| 685,4631 |  | 294,37 | 18,41 |
| 685,5416 |  | 409,46 | 25,61 |
| 685,6232 |  | 119,01 | 7,44  |
| 686,4729 |  | 142,86 | 8,94  |
| 686,5752 |  | 162,04 | 10,14 |
| 687,4717 |  | 123,29 | 7,71  |
| 687,5498 |  | 341,56 | 21,37 |
| 688,5525 |  | 159,55 | 9,98  |
| 689,4302 |  | 326,4  | 20,42 |
| 689,5177 |  | 109,62 | 6,86  |
| 689,5677 |  | 133,82 | 8,37  |
| 690,4324 |  | 110,95 | 6,94  |
| 691,4431 |  | 167,15 | 10,46 |
| 701,5422 |  | 313,03 | 19,58 |
| 702,4833 |  | 200,47 | 12,54 |
| 702,5644 |  | 582,63 | 36,45 |
| 702,627  |  | 211,52 | 13,23 |
| 703,5838 |  | 356,24 | 22,28 |
| 704,5007 |  | 146,96 | 9,19  |
| 704,5861 |  | 451,92 | 28,27 |
| 704,6515 |  | 152,36 | 9,53  |
| 705,4358 |  | 241,5  | 15,11 |
| 705,5817 |  | 250,18 | 15,65 |
| 706,5933 |  | 155,6  | 9,73  |
| 707,4416 |  | 382,23 | 23,91 |
| 707,5259 |  | 309,53 | 19,36 |
| 707,5792 |  | 292,27 | 18,28 |
| 708,4442 |  | 117,9  | 7,38  |
| 708,5838 |  | 121,67 | 7,61  |
| 709,4533 |  | 223,54 | 13,98 |
| 709,5486 |  | 410,24 | 25,66 |
| 709,5988 |  | 218,3  | 13,66 |
| 710,6047 |  | 192,42 | 12,04 |
| 711,5516 |  | 142,67 | 8,92  |
| 711,606  |  | 164,07 | 10,26 |
| 717,5574 |  | 125,75 | 7,87  |
| 718,487  |  | 114,51 | 7,16  |
| 718,5787 |  | 483,52 | 30,25 |
| 718,6271 |  | 119,76 | 7,49  |
| 719,5822 |  | 255,98 | 16,01 |
| 720,5864 |  | 161,26 | 10,09 |
| 720,6177 |  | 170,85 | 10,69 |
| 721,6287 |  | 147,6  | 9,23  |

|          |  |        |       |
|----------|--|--------|-------|
| 723,421  |  | 131,38 | 8,22  |
| 723,5195 |  | 173,29 | 10,84 |
| 723,5436 |  | 400,17 | 25,03 |
| 723,6062 |  | 181,16 | 11,33 |
| 724,4763 |  | 167,55 | 10,48 |
| 724,5569 |  | 283,67 | 17,75 |
| 725,552  |  | 441,58 | 27,62 |
| 725,6162 |  | 191,72 | 11,99 |
| 726,5759 |  | 235,08 | 14,71 |
| 727,5979 |  | 221,63 | 13,86 |
| 729,6124 |  | 107,62 | 6,73  |
| 739,5466 |  | 209,33 | 13,09 |
| 741,5738 |  | 345,97 | 21,64 |
| 742,6    |  | 387,86 | 24,26 |
| 743,5948 |  | 400,72 | 25,07 |
| 743,6496 |  | 163,7  | 10,24 |
| 744,6158 |  | 410,93 | 25,71 |
| 745,5961 |  | 130,19 | 8,14  |
| 745,6475 |  | 152,3  | 9,53  |
| 746,634  |  | 245,18 | 15,34 |
| 747,5612 |  | 139,35 | 8,72  |
| 747,6255 |  | 106,49 | 6,66  |
| 749,5673 |  | 156    | 9,76  |
| 749,6267 |  | 112,76 | 7,05  |
| 751,5644 |  | 110,56 | 6,92  |
| 752,5761 |  | 100,89 | 6,31  |
| 757,5773 |  | 209,92 | 13,13 |
| 758,604  |  | 370,28 | 23,16 |
| 759,5013 |  | 103,74 | 6,49  |
| 759,5963 |  | 532,77 | 33,33 |
| 760,6173 |  | 359,59 | 22,49 |
| 761,5124 |  | 125,05 | 7,82  |
| 761,6083 |  | 390,51 | 24,43 |
| 762,6101 |  | 183,04 | 11,45 |
| 763,46   |  | 208,91 | 13,07 |
| 763,5484 |  | 225,13 | 14,08 |
| 763,6027 |  | 220,16 | 13,77 |
| 765,5667 |  | 258,03 | 16,14 |
| 766,5755 |  | 101,15 | 6,33  |
| 774,6119 |  | 168,47 | 10,54 |
| 775,5848 |  | 297,14 | 18,59 |
| 775,6267 |  | 109,03 | 6,82  |
| 776,6004 |  | 579,32 | 36,24 |
| 776,6538 |  | 183,78 | 11,5  |
| 777,6057 |  | 408,1  | 25,53 |
| 777,6714 |  | 178,28 | 11,15 |
| 778,6209 |  | 485,04 | 30,34 |
| 778,6788 |  | 133,4  | 8,34  |
| 779,4748 |  | 103,5  | 6,47  |
| 779,5649 |  | 110,52 | 6,91  |
| 779,6093 |  | 277,97 | 17,39 |
| 779,687  |  | 132,92 | 8,32  |
| 780,6301 |  | 163    | 10,2  |
| 781,4762 |  | 123,47 | 7,72  |

|          |  |        |       |
|----------|--|--------|-------|
| 781,5658 |  | 507,74 | 31,76 |
| 781,6295 |  | 231,37 | 14,47 |
| 782,5801 |  | 270,26 | 16,91 |
| 783,5845 |  | 434,05 | 27,15 |
| 783,6419 |  | 140,57 | 8,79  |
| 784,6144 |  | 235,75 | 14,75 |
| 785,6171 |  | 127,73 | 7,99  |
| 792,6153 |  | 484,27 | 30,29 |
| 792,6695 |  | 160,88 | 10,06 |
| 793,6117 |  | 258,47 | 16,17 |
| 794,6338 |  | 318,71 | 19,94 |
| 795,6315 |  | 118,62 | 7,42  |
| 797,5711 |  | 521,61 | 32,63 |
| 797,6298 |  | 124,06 | 7,76  |
| 798,5922 |  | 278,58 | 17,43 |
| 799,5986 |  | 448,62 | 28,06 |
| 799,6569 |  | 114,3  | 7,15  |
| 800,6177 |  | 271,45 | 16,98 |
| 801,6394 |  | 155,52 | 9,73  |
| 802,6388 |  | 114,15 | 7,14  |
| 808,6142 |  | 182,21 | 11,4  |
| 813,5575 |  | 101,46 | 6,35  |
| 813,6072 |  | 168,02 | 10,51 |
| 815,6185 |  | 223,9  | 14,01 |
| 816,6341 |  | 276,13 | 17,27 |
| 817,6433 |  | 220,89 | 13,82 |
| 818,6577 |  | 209,17 | 13,09 |
| 819,6502 |  | 173,54 | 10,86 |
| 820,661  |  | 123,95 | 7,75  |
| 821,5943 |  | 153,14 | 9,58  |
| 823,6069 |  | 142,34 | 8,9   |
| 832,6397 |  | 219,79 | 13,75 |
| 833,6492 |  | 199,39 | 12,47 |
| 834,6433 |  | 260,64 | 16,3  |
| 835,6402 |  | 247,24 | 15,47 |
| 836,6636 |  | 130,7  | 8,18  |
| 837,6088 |  | 168,82 | 10,56 |
| 839,6066 |  | 103,02 | 6,44  |
| 839,6442 |  | 107,64 | 6,73  |
| 849,6419 |  | 243,46 | 15,23 |
| 850,6441 |  | 355,9  | 22,26 |
| 850,7017 |  | 192,26 | 12,03 |
| 851,6522 |  | 289,01 | 18,08 |
| 852,5828 |  | 106,74 | 6,68  |
| 852,6692 |  | 278,25 | 17,41 |
| 853,6467 |  | 243,8  | 15,25 |
| 854,6695 |  | 143,23 | 8,96  |
| 855,6131 |  | 390,81 | 24,45 |
| 856,6261 |  | 211,04 | 13,2  |
| 857,6225 |  | 295,93 | 18,51 |
| 857,6819 |  | 157,97 | 9,88  |
| 858,6627 |  | 114,82 | 7,18  |
| 866,656  |  | 341,54 | 21,37 |
| 867,6526 |  | 183,98 | 11,51 |

|           |  |        |       |
|-----------|--|--------|-------|
| 868,6613  |  | 191,69 | 11,99 |
| 871,6061  |  | 310,68 | 19,43 |
| 871,6571  |  | 140,82 | 8,81  |
| 872,6096  |  | 199,14 | 12,46 |
| 873,6524  |  | 180,52 | 11,29 |
| 874,636   |  | 131,29 | 8,21  |
| 887,6289  |  | 127,75 | 7,99  |
| 890,6809  |  | 166,44 | 10,41 |
| 892,6994  |  | 171,68 | 10,74 |
| 894,7011  |  | 145,37 | 9,09  |
| 895,6381  |  | 134,81 | 8,43  |
| 906,6818  |  | 126,76 | 7,93  |
| 907,665   |  | 141,24 | 8,84  |
| 908,6922  |  | 127,56 | 7,98  |
| 909,6788  |  | 171,51 | 10,73 |
| 911,6866  |  | 168,95 | 10,57 |
| 913,6696  |  | 131,1  | 8,2   |
| 924,6825  |  | 256,87 | 16,07 |
| 924,7629  |  | 123,16 | 7,7   |
| 925,7069  |  | 151,47 | 9,48  |
| 926,6971  |  | 222,74 | 13,93 |
| 927,6924  |  | 219,93 | 13,76 |
| 927,7689  |  | 111,99 | 7,01  |
| 928,7061  |  | 135,44 | 8,47  |
| 929,6551  |  | 239,33 | 14,97 |
| 930,6538  |  | 100,62 | 6,29  |
| 931,6437  |  | 147,37 | 9,22  |
| 940,7077  |  | 219,77 | 13,75 |
| 941,7085  |  | 126,67 | 7,92  |
| 942,7197  |  | 160,75 | 10,06 |
| 943,7099  |  | 101,41 | 6,34  |
| 945,6174  |  | 108,53 | 6,79  |
| 945,6715  |  | 111,66 | 6,98  |
| 947,6949  |  | 115,73 | 7,24  |
| 966,8455  |  | 100,94 | 6,31  |
| 985,6756  |  | 115,53 | 7,23  |
| 998,7131  |  | 135,17 | 8,46  |
| 998,7834  |  | 100,98 | 6,32  |
| 999,7428  |  | 102,92 | 6,44  |
| 1000,738  |  | 179,6  | 11,24 |
| 1000,8199 |  | 175,44 | 10,97 |
| 1001,7912 |  | 215,76 | 13,5  |
| 1002,7832 |  | 100,6  | 6,29  |
| 1003,6784 |  | 119,29 | 7,46  |
| 1005,806  |  | 115,18 | 7,21  |
| 1014,7321 |  | 135,61 | 8,48  |
| 1014,812  |  | 157,53 | 9,85  |
| 1016,8102 |  | 167,21 | 10,46 |
| 1021,7803 |  | 108,8  | 6,81  |
| 1030,8465 |  | 124,03 | 7,76  |
| 1040,8544 |  | 134,4  | 8,41  |
| 1054,8331 |  | 121,45 | 7,6   |
| 1056,848  |  | 163,74 | 10,24 |
| 1059,7679 |  | 112,9  | 7,06  |

|           |  |        |       |
|-----------|--|--------|-------|
| 1072,8305 |  | 145,92 | 9,13  |
| 1074,8329 |  | 138,85 | 8,69  |
| 1074,8899 |  | 114,46 | 7,16  |
| 1088,8533 |  | 249,42 | 15,6  |
| 1089,823  |  | 104,73 | 6,55  |
| 1090,8641 |  | 173    | 10,82 |
| 1129,8602 |  | 114,03 | 7,13  |
| 1130,8907 |  | 119,29 | 7,46  |
| 1148,917  |  | 102,51 | 6,41  |
| 1149,8982 |  | 108,15 | 6,77  |
| 1164,8807 |  | 120,61 | 7,54  |
| 1169,8918 |  | 133    | 8,32  |

sm

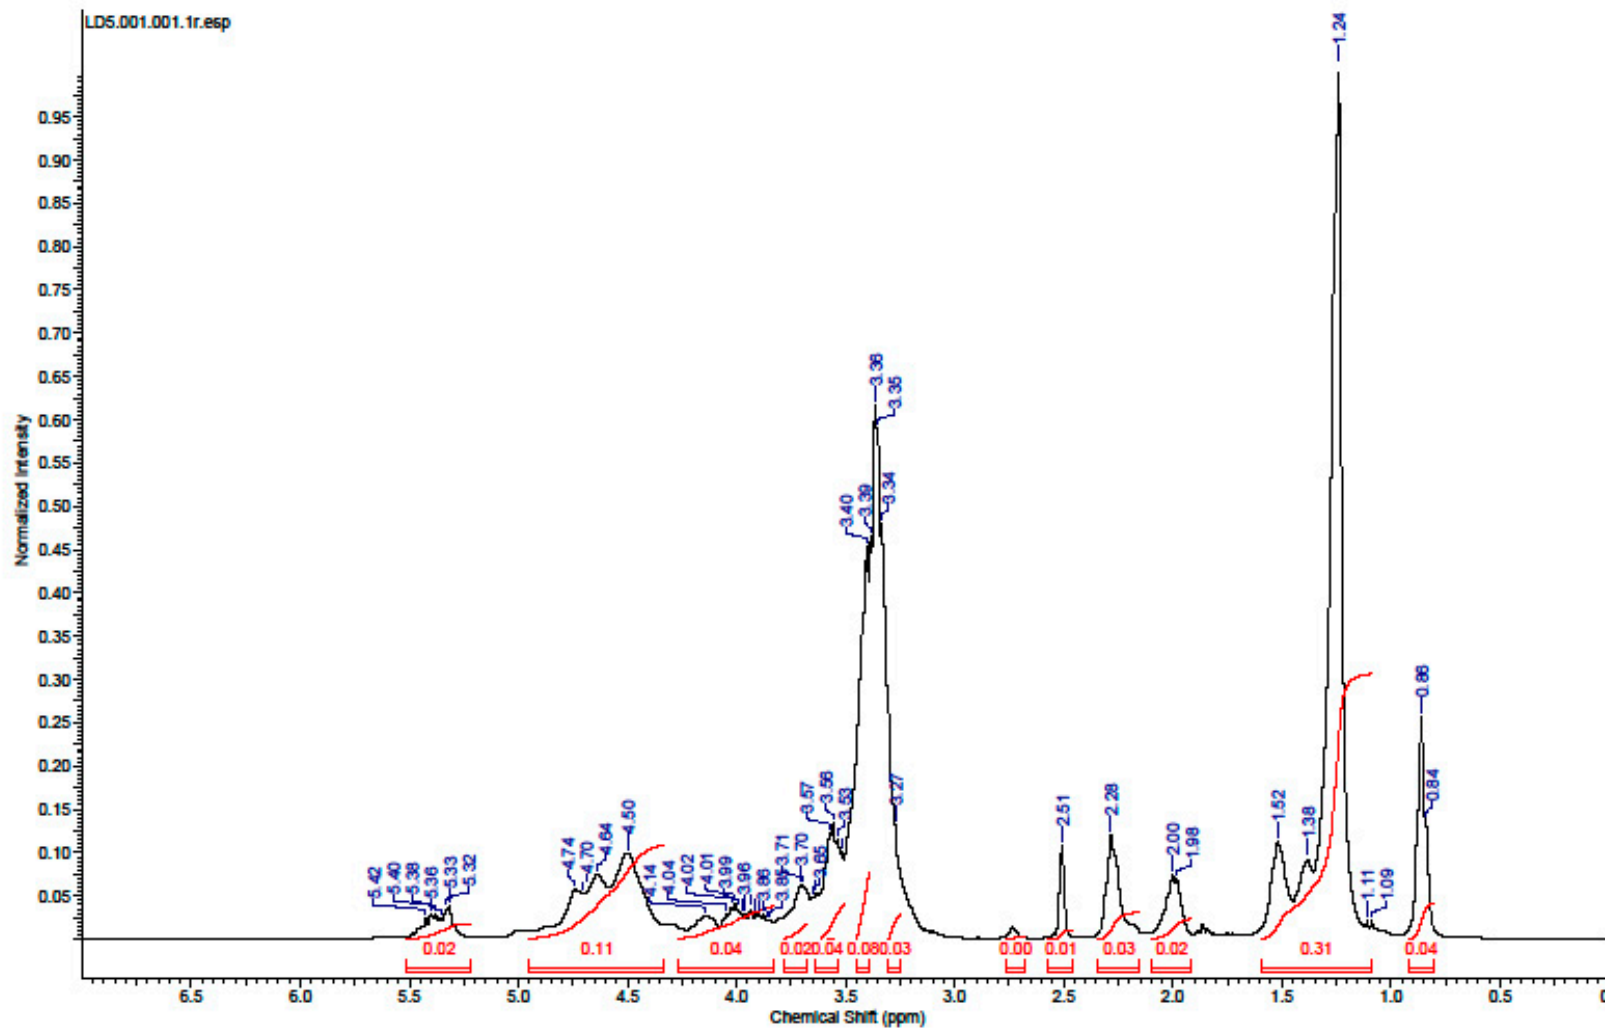

***Esters 18b (Polyglycerol + epoxidized soybean oil FAME)***

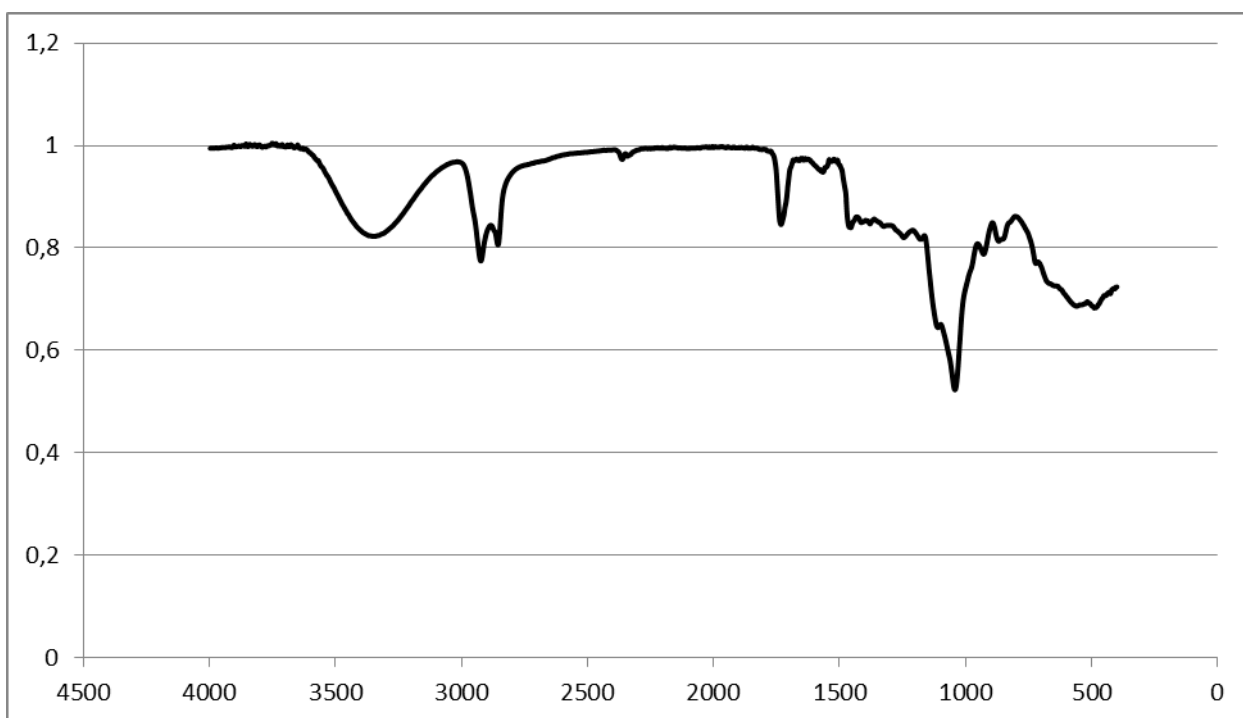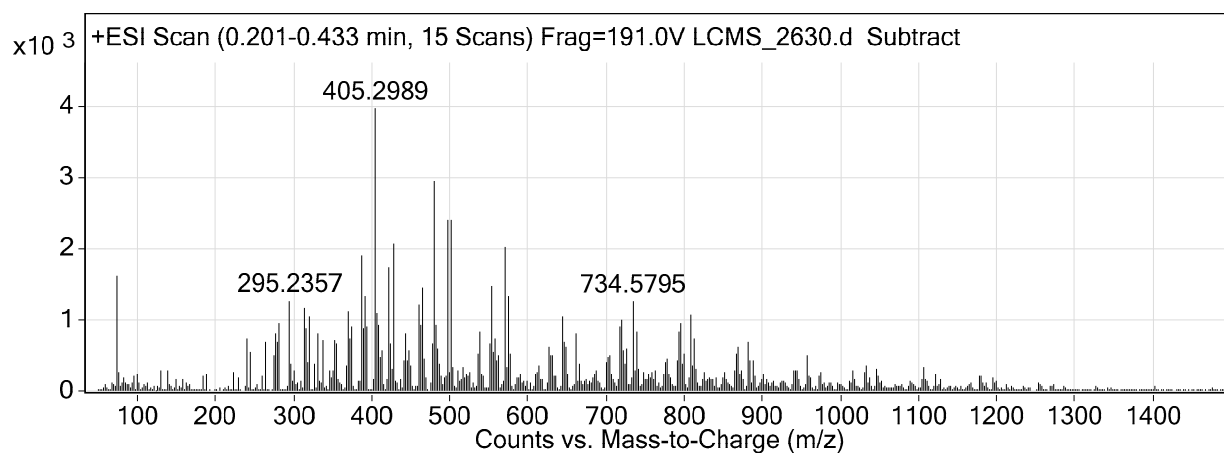

| m/z      | Species | Abund   | Abund % |
|----------|---------|---------|---------|
| 67,0571  |         | 114,83  | 2,89    |
| 74,0628  |         | 1606,33 | 40,47   |
| 75,0459  |         | 253,04  | 6,38    |
| 75,0622  |         | 119,24  | 3       |
| 75,0674  |         | 162,67  | 4,1     |
| 81,0721  |         | 111,26  | 2,8     |
| 82,0702  |         | 201,6   | 5,08    |
| 83,087   |         | 127,03  | 3,2     |
| 84,0987  |         | 125,65  | 3,17    |
| 86,1176  |         | 106,39  | 2,68    |
| 93,0705  |         | 112,39  | 2,83    |
| 94,072   |         | 118,54  | 2,99    |
| 95,0878  |         | 213,42  | 5,38    |
| 100,1344 |         | 230,43  | 5,81    |
| 101,0618 |         | 121,06  | 3,05    |
| 113,0983 |         | 112,55  | 2,84    |

|          |  |         |       |
|----------|--|---------|-------|
| 129,1529 |  | 218,31  | 5,5   |
| 131,0726 |  | 285,09  | 7,18  |
| 139,1218 |  | 282,36  | 7,11  |
| 149,0348 |  | 145,6   | 3,67  |
| 149,082  |  | 163,15  | 4,11  |
| 158,1584 |  | 177,11  | 4,46  |
| 163,1276 |  | 109,65  | 2,76  |
| 185,1201 |  | 214,7   | 5,41  |
| 185,1496 |  | 108,21  | 2,73  |
| 189,0774 |  | 241,45  | 6,08  |
| 223,1237 |  | 259,7   | 6,54  |
| 230,2532 |  | 195,97  | 4,94  |
| 239,2379 |  | 102,11  | 2,57  |
| 241,1338 |  | 733,82  | 18,49 |
| 241,1631 |  | 341,74  | 8,61  |
| 245,1049 |  | 544,17  | 13,71 |
| 245,1368 |  | 226,95  | 5,72  |
| 259,1565 |  | 202,8   | 5,11  |
| 263,1175 |  | 689,39  | 17,37 |
| 263,1514 |  | 299,28  | 7,54  |
| 274,281  |  | 495,84  | 12,49 |
| 277,2224 |  | 809,47  | 20,4  |
| 278,2251 |  | 119,78  | 3,02  |
| 279,086  |  | 106,36  | 2,68  |
| 279,1494 |  | 133,58  | 3,37  |
| 279,239  |  | 682,82  | 17,2  |
| 279,2677 |  | 113,54  | 2,86  |
| 281,254  |  | 947,14  | 23,86 |
| 281,2871 |  | 389,57  | 9,82  |
| 295,2357 |  | 1266,94 | 31,92 |
| 295,27   |  | 287,48  | 7,24  |
| 296,2308 |  | 242,53  | 6,11  |
| 296,2711 |  | 140,7   | 3,55  |
| 297,1644 |  | 383,83  | 9,67  |
| 297,243  |  | 164,6   | 4,15  |
| 299,2627 |  | 140,18  | 3,53  |
| 301,1315 |  | 274,48  | 6,92  |
| 301,1707 |  | 102,32  | 2,58  |
| 302,3057 |  | 106,52  | 2,68  |
| 304,3051 |  | 112,36  | 2,83  |
| 309,2417 |  | 137,84  | 3,47  |
| 313,2468 |  | 1157,11 | 29,15 |
| 313,2776 |  | 677,49  | 17,07 |
| 313,3746 |  | 107,48  | 2,71  |
| 314,2476 |  | 273,42  | 6,89  |
| 314,2844 |  | 145,95  | 3,68  |
| 315,1755 |  | 881,79  | 22,22 |
| 315,2022 |  | 115,8   | 2,92  |
| 316,1716 |  | 145,67  | 3,67  |
| 318,3078 |  | 413,11  | 10,41 |
| 318,3472 |  | 128,75  | 3,24  |
| 319,146  |  | 1048,04 | 26,41 |
| 319,178  |  | 214,84  | 5,41  |
| 320,146  |  | 103,72  | 2,61  |

|          |  |         |       |
|----------|--|---------|-------|
| 327,2582 |  | 374,07  | 9,43  |
| 327,3013 |  | 101,77  | 2,56  |
| 331,253  |  | 202,15  | 5,09  |
| 331,2792 |  | 817,18  | 20,59 |
| 331,3294 |  | 100,55  | 2,53  |
| 332,2847 |  | 150,03  | 3,78  |
| 332,3299 |  | 107,07  | 2,7   |
| 334,2977 |  | 110,95  | 2,8   |
| 337,1532 |  | 714,32  | 18    |
| 337,1923 |  | 263,27  | 6,63  |
| 345,2716 |  | 273,28  | 6,89  |
| 346,3346 |  | 104,5   | 2,63  |
| 348,3117 |  | 201,17  | 5,07  |
| 351,257  |  | 284,6   | 7,17  |
| 353,1214 |  | 100,04  | 2,52  |
| 353,2335 |  | 399,69  | 10,07 |
| 353,2736 |  | 705,88  | 17,79 |
| 354,2755 |  | 141,13  | 3,56  |
| 355,2945 |  | 659,51  | 16,62 |
| 355,3241 |  | 125,62  | 3,17  |
| 356,2975 |  | 159,47  | 4,02  |
| 359,3179 |  | 116,89  | 2,95  |
| 362,3326 |  | 106,33  | 2,68  |
| 367,2539 |  | 360,11  | 9,07  |
| 367,2869 |  | 101,03  | 2,55  |
| 369,2722 |  | 1123,25 | 28,3  |
| 369,3129 |  | 457,85  | 11,54 |
| 370,2718 |  | 324,12  | 8,17  |
| 371,2017 |  | 347,75  | 8,76  |
| 371,2834 |  | 733,45  | 18,48 |
| 371,3216 |  | 517,57  | 13,04 |
| 372,2909 |  | 150     | 3,78  |
| 372,3186 |  | 135     | 3,4   |
| 373,3032 |  | 899,1   | 22,65 |
| 373,3434 |  | 400,38  | 10,09 |
| 374,3056 |  | 242,62  | 6,11  |
| 374,3479 |  | 122,38  | 3,08  |
| 375,1714 |  | 392,02  | 9,88  |
| 375,2082 |  | 105,76  | 2,66  |
| 383,2421 |  | 138,86  | 3,5   |
| 385,2682 |  | 153,14  | 3,86  |
| 387,2881 |  | 1898,62 | 47,84 |
| 387,3181 |  | 666,64  | 16,8  |
| 388,2902 |  | 595,4   | 15    |
| 388,3301 |  | 238,82  | 6,02  |
| 389,2104 |  | 553,63  | 13,95 |
| 389,2957 |  | 868,21  | 21,88 |
| 389,3337 |  | 396,31  | 9,99  |
| 390,298  |  | 103,44  | 2,61  |
| 390,3109 |  | 143,23  | 3,61  |
| 391,3155 |  | 1332,06 | 33,56 |
| 391,3512 |  | 320,94  | 8,09  |
| 392,3147 |  | 288,94  | 7,28  |
| 392,3575 |  | 150,63  | 3,8   |

|          |  |         |       |
|----------|--|---------|-------|
| 393,1816 |  | 897,86  | 22,62 |
| 393,2179 |  | 277,55  | 6,99  |
| 394,1799 |  | 121,81  | 3,07  |
| 401,2626 |  | 170,63  | 4,3   |
| 403,2841 |  | 145,76  | 3,67  |
| 404,3443 |  | 132,13  | 3,33  |
| 405,2989 |  | 3968,88 | 100   |
| 405,3335 |  | 843,74  | 21,26 |
| 405,4795 |  | 100,38  | 2,53  |
| 406,2943 |  | 133,69  | 3,37  |
| 406,3183 |  | 1094,68 | 27,58 |
| 407,3208 |  | 317,61  | 8     |
| 408,3425 |  | 928,14  | 23,39 |
| 408,3768 |  | 195,34  | 4,92  |
| 408,4392 |  | 101,61  | 2,56  |
| 409,3347 |  | 354,79  | 8,94  |
| 411,1923 |  | 447,96  | 11,29 |
| 411,2792 |  | 464,31  | 11,7  |
| 411,3252 |  | 234,62  | 5,91  |
| 412,2884 |  | 110,6   | 2,79  |
| 413,2983 |  | 566,79  | 14,28 |
| 413,3373 |  | 175,76  | 4,43  |
| 419,2724 |  | 143,69  | 3,62  |
| 419,2889 |  | 155,57  | 3,92  |
| 419,3165 |  | 139,69  | 3,52  |
| 420,3038 |  | 146,24  | 3,68  |
| 421,2813 |  | 165     | 4,16  |
| 422,3191 |  | 163,26  | 4,11  |
| 422,3377 |  | 1733,13 | 43,67 |
| 422,3587 |  | 165,15  | 4,16  |
| 422,4798 |  | 114,07  | 2,87  |
| 423,3288 |  | 669,87  | 16,88 |
| 423,3629 |  | 252,92  | 6,37  |
| 424,3237 |  | 120,82  | 3,04  |
| 425,3028 |  | 320,39  | 8,07  |
| 427,2862 |  | 2072,95 | 52,23 |
| 427,3178 |  | 168,22  | 4,24  |
| 428,2848 |  | 593,42  | 14,95 |
| 428,3133 |  | 222,11  | 5,6   |
| 429,2619 |  | 101,77  | 2,56  |
| 429,315  |  | 300,87  | 7,58  |
| 429,3328 |  | 169,56  | 4,27  |
| 429,369  |  | 145,53  | 3,67  |
| 433,3678 |  | 128,09  | 3,23  |
| 436,3511 |  | 141,22  | 3,56  |
| 437,2854 |  | 137,5   | 3,46  |
| 437,3201 |  | 159,42  | 4,02  |
| 441,288  |  | 426,32  | 10,74 |
| 443,2503 |  | 160     | 4,03  |
| 443,3059 |  | 797,38  | 20,09 |
| 444,2862 |  | 100,8   | 2,54  |
| 444,3082 |  | 122,96  | 3,1   |
| 444,3543 |  | 101,88  | 2,57  |
| 445,3167 |  | 437,22  | 11,02 |

|          |  |         |       |
|----------|--|---------|-------|
| 445,367  |  | 114,65  | 2,89  |
| 446,3485 |  | 114,75  | 2,89  |
| 447,344  |  | 578,91  | 14,59 |
| 447,3871 |  | 124,13  | 3,13  |
| 448,3449 |  | 119,11  | 3     |
| 449,2097 |  | 366,06  | 9,22  |
| 449,2479 |  | 151,74  | 3,82  |
| 450,3866 |  | 365,77  | 9,22  |
| 461,3286 |  | 1219,94 | 30,74 |
| 461,3678 |  | 297,16  | 7,49  |
| 462,3394 |  | 444,01  | 11,19 |
| 462,3902 |  | 109,91  | 2,77  |
| 463,2486 |  | 259,21  | 6,53  |
| 463,3365 |  | 915,65  | 23,07 |
| 463,386  |  | 199,05  | 5,02  |
| 464,3651 |  | 495,88  | 12,49 |
| 464,3945 |  | 100,57  | 2,53  |
| 465,3572 |  | 1444,69 | 36,4  |
| 465,3973 |  | 223,43  | 5,63  |
| 466,3523 |  | 294,58  | 7,42  |
| 466,3717 |  | 132,35  | 3,33  |
| 466,4029 |  | 156,81  | 3,95  |
| 467,2208 |  | 462,1   | 11,64 |
| 467,2944 |  | 117,38  | 2,96  |
| 467,3533 |  | 204,36  | 5,15  |
| 468,2215 |  | 117,29  | 2,96  |
| 469,3244 |  | 193,13  | 4,87  |
| 475,2971 |  | 107,22  | 2,7   |
| 477,3182 |  | 197,89  | 4,99  |
| 478,362  |  | 653,07  | 16,45 |
| 478,401  |  | 188,59  | 4,75  |
| 479,3406 |  | 2954,14 | 74,43 |
| 480,2707 |  | 130,83  | 3,3   |
| 480,3535 |  | 1144,42 | 28,83 |
| 480,41   |  | 192,41  | 4,85  |
| 480,4706 |  | 135,47  | 3,41  |
| 481,3477 |  | 292,21  | 7,36  |
| 481,3872 |  | 158,65  | 4     |
| 482,3795 |  | 933,87  | 23,53 |
| 482,421  |  | 301,17  | 7,59  |
| 483,3049 |  | 500,13  | 12,6  |
| 483,3284 |  | 218,15  | 5,5   |
| 483,3603 |  | 425,04  | 10,71 |
| 484,3031 |  | 175,55  | 4,42  |
| 484,3386 |  | 115,71  | 2,92  |
| 485,2267 |  | 266,52  | 6,72  |
| 485,3228 |  | 593,09  | 14,94 |
| 486,3273 |  | 185,13  | 4,66  |
| 487,3328 |  | 391,7   | 9,87  |
| 487,3419 |  | 320,7   | 8,08  |
| 487,3764 |  | 137,84  | 3,47  |
| 488,3384 |  | 209,84  | 5,29  |
| 489,3278 |  | 110,68  | 2,79  |
| 493,3444 |  | 196,75  | 4,96  |

|          |  |         |       |
|----------|--|---------|-------|
| 494,3349 |  | 209,65  | 5,28  |
| 494,3885 |  | 108,47  | 2,73  |
| 495,3282 |  | 219,59  | 5,53  |
| 496,3672 |  | 2393,43 | 60,3  |
| 496,3991 |  | 602,13  | 15,17 |
| 497,3643 |  | 1058,32 | 26,67 |
| 497,4168 |  | 253,96  | 6,4   |
| 498,3599 |  | 288,03  | 7,26  |
| 499,3221 |  | 259,21  | 6,53  |
| 501,3231 |  | 2395,8  | 60,36 |
| 502,3226 |  | 638,7   | 16,09 |
| 502,362  |  | 245,5   | 6,19  |
| 503,3157 |  | 262,07  | 6,6   |
| 503,3535 |  | 202,26  | 5,1   |
| 504,3938 |  | 322,55  | 8,13  |
| 504,4439 |  | 139,97  | 3,53  |
| 510,3409 |  | 195,78  | 4,93  |
| 511,3515 |  | 274,11  | 6,91  |
| 512,3443 |  | 144,3   | 3,64  |
| 515,2964 |  | 169,94  | 4,28  |
| 515,3317 |  | 177,77  | 4,48  |
| 517,3042 |  | 333,27  | 8,4   |
| 517,3387 |  | 184,16  | 4,64  |
| 517,3922 |  | 119,63  | 3,01  |
| 518,386  |  | 116,67  | 2,94  |
| 519,3203 |  | 191,08  | 4,81  |
| 521,376  |  | 225,98  | 5,69  |
| 523,241  |  | 204,51  | 5,15  |
| 523,2876 |  | 100,82  | 2,54  |
| 524,4263 |  | 267,11  | 6,73  |
| 529,3791 |  | 126,67  | 3,19  |
| 535,3636 |  | 446,85  | 11,26 |
| 535,4061 |  | 103,74  | 2,61  |
| 536,3824 |  | 333,14  | 8,39  |
| 537,288  |  | 136,28  | 3,43  |
| 537,3776 |  | 526,51  | 13,27 |
| 538,4056 |  | 362,9   | 9,14  |
| 539,3921 |  | 840,57  | 21,18 |
| 539,4375 |  | 227,23  | 5,73  |
| 540,398  |  | 245,1   | 6,18  |
| 541,2605 |  | 216,66  | 5,46  |
| 541,3227 |  | 132,78  | 3,35  |
| 541,395  |  | 150,62  | 3,8   |
| 543,3589 |  | 210,76  | 5,31  |
| 543,4083 |  | 131,01  | 3,3   |
| 552,4007 |  | 658,08  | 16,58 |
| 552,4379 |  | 103,6   | 2,61  |
| 553,3772 |  | 1472,94 | 37,11 |
| 553,4179 |  | 539,15  | 13,58 |
| 554,3938 |  | 722,48  | 18,2  |
| 554,4425 |  | 243,43  | 6,13  |
| 555,3902 |  | 262,02  | 6,6   |
| 556,4197 |  | 551,52  | 13,9  |
| 556,4653 |  | 109,55  | 2,76  |

|          |  |         |       |
|----------|--|---------|-------|
| 557,3551 |  | 739,82  | 18,64 |
| 557,4101 |  | 315,79  | 7,96  |
| 558,3482 |  | 117,94  | 2,97  |
| 558,4029 |  | 141,57  | 3,57  |
| 559,273  |  | 115,61  | 2,91  |
| 559,353  |  | 426,57  | 10,75 |
| 560,3593 |  | 121,6   | 3,06  |
| 561,3718 |  | 489,49  | 12,33 |
| 561,4247 |  | 197,12  | 4,97  |
| 562,3679 |  | 110,78  | 2,79  |
| 562,4202 |  | 114,17  | 2,88  |
| 568,376  |  | 108,82  | 2,74  |
| 569,368  |  | 137,6   | 3,47  |
| 570,4093 |  | 2012,02 | 50,69 |
| 570,5631 |  | 114,15  | 2,88  |
| 571,4011 |  | 933,6   | 23,52 |
| 571,4425 |  | 113,35  | 2,86  |
| 572,4002 |  | 326,82  | 8,23  |
| 573,3289 |  | 125,56  | 3,16  |
| 575,3597 |  | 1331,42 | 33,55 |
| 575,3981 |  | 266,82  | 6,72  |
| 576,3726 |  | 520,53  | 13,12 |
| 577,3514 |  | 171,58  | 4,32  |
| 585,3822 |  | 195,07  | 4,92  |
| 588,4073 |  | 200,5   | 5,05  |
| 588,4646 |  | 107,25  | 2,7   |
| 589,3674 |  | 151,59  | 3,82  |
| 591,3406 |  | 228,76  | 5,76  |
| 591,3856 |  | 107,57  | 2,71  |
| 593,3822 |  | 120,81  | 3,04  |
| 595,4131 |  | 138,01  | 3,48  |
| 598,455  |  | 140,23  | 3,53  |
| 603,4064 |  | 123,91  | 3,12  |
| 609,4049 |  | 248,98  | 6,27  |
| 609,5216 |  | 114,08  | 2,87  |
| 610,403  |  | 153,07  | 3,86  |
| 610,4471 |  | 112,48  | 2,83  |
| 611,412  |  | 249,59  | 6,29  |
| 611,5206 |  | 142,77  | 3,6   |
| 612,4382 |  | 167,54  | 4,22  |
| 613,4303 |  | 358,4   | 9,03  |
| 614,4298 |  | 128,89  | 3,25  |
| 615,2925 |  | 135,36  | 3,41  |
| 615,381  |  | 170,99  | 4,31  |
| 617,4008 |  | 165,71  | 4,18  |
| 625,5069 |  | 112,97  | 2,85  |
| 626,4312 |  | 452,41  | 11,4  |
| 626,4887 |  | 108,89  | 2,74  |
| 627,4187 |  | 616,56  | 15,53 |
| 627,4789 |  | 306,94  | 7,73  |
| 628,3468 |  | 125,93  | 3,17  |
| 628,4294 |  | 490,06  | 12,35 |
| 628,4921 |  | 137,97  | 3,48  |
| 629,4288 |  | 203,45  | 5,13  |

|          |  |         |       |
|----------|--|---------|-------|
| 629,5429 |  | 127,4   | 3,21  |
| 630,4555 |  | 412,62  | 10,4  |
| 630,5069 |  | 218,32  | 5,5   |
| 631,3913 |  | 499,49  | 12,59 |
| 631,4352 |  | 267,51  | 6,74  |
| 632,3994 |  | 246,3   | 6,21  |
| 633,3914 |  | 221,61  | 5,58  |
| 635,4089 |  | 221,6   | 5,58  |
| 635,4487 |  | 196,76  | 4,96  |
| 643,5194 |  | 412,74  | 10,4  |
| 644,4496 |  | 1036,29 | 26,11 |
| 644,4968 |  | 227,71  | 5,74  |
| 644,5507 |  | 355,26  | 8,95  |
| 644,6202 |  | 121,28  | 3,06  |
| 645,4465 |  | 696,86  | 17,56 |
| 645,5177 |  | 193,1   | 4,87  |
| 645,5837 |  | 122,22  | 3,08  |
| 646,4415 |  | 225,83  | 5,69  |
| 646,5698 |  | 448,05  | 11,29 |
| 646,6378 |  | 139,94  | 3,53  |
| 647,3831 |  | 109,52  | 2,76  |
| 647,5603 |  | 148,95  | 3,75  |
| 649,3973 |  | 625,91  | 15,77 |
| 649,4434 |  | 316,74  | 7,98  |
| 649,5025 |  | 119,66  | 3,01  |
| 650,3972 |  | 247,57  | 6,24  |
| 650,4592 |  | 118,41  | 2,98  |
| 651,5117 |  | 179,14  | 4,51  |
| 660,56   |  | 796,43  | 20,07 |
| 661,5556 |  | 368,47  | 9,28  |
| 662,4514 |  | 168,63  | 4,25  |
| 663,4882 |  | 141,88  | 3,57  |
| 665,3926 |  | 167,77  | 4,23  |
| 665,5075 |  | 385,72  | 9,72  |
| 665,5623 |  | 144,84  | 3,65  |
| 666,5065 |  | 170,97  | 4,31  |
| 667,4287 |  | 111,65  | 2,81  |
| 667,5266 |  | 136,92  | 3,45  |
| 671,5636 |  | 133,23  | 3,36  |
| 672,5664 |  | 119,29  | 3,01  |
| 674,5322 |  | 166,52  | 4,2   |
| 674,5976 |  | 167,22  | 4,21  |
| 679,5022 |  | 131,79  | 3,32  |
| 681,4792 |  | 123,69  | 3,12  |
| 683,528  |  | 187,87  | 4,73  |
| 684,4535 |  | 115,81  | 2,92  |
| 684,521  |  | 142,65  | 3,59  |
| 685,5326 |  | 240,95  | 6,07  |
| 685,586  |  | 103,64  | 2,61  |
| 686,5481 |  | 100,48  | 2,53  |
| 686,5844 |  | 130,62  | 3,29  |
| 687,4559 |  | 149,34  | 3,76  |
| 688,5785 |  | 285,8   | 7,2   |
| 688,6297 |  | 123,96  | 3,12  |

|          |  |         |       |
|----------|--|---------|-------|
| 689,4082 |  | 102,4   | 2,58  |
| 689,4749 |  | 101,85  | 2,57  |
| 689,584  |  | 150,94  | 3,8   |
| 691,4404 |  | 126,15  | 3,18  |
| 700,4763 |  | 239,53  | 6,04  |
| 700,5306 |  | 193,82  | 4,88  |
| 701,4519 |  | 280,89  | 7,08  |
| 701,5218 |  | 395,5   | 9,97  |
| 701,5787 |  | 108,16  | 2,73  |
| 702,4523 |  | 189,22  | 4,77  |
| 702,5274 |  | 189,07  | 4,76  |
| 702,5768 |  | 165,65  | 4,17  |
| 703,5502 |  | 482,54  | 12,16 |
| 703,6019 |  | 225,25  | 5,68  |
| 704,5641 |  | 508,81  | 12,82 |
| 704,6298 |  | 143,13  | 3,61  |
| 705,424  |  | 334,35  | 8,42  |
| 705,4715 |  | 195,46  | 4,92  |
| 705,5636 |  | 209,86  | 5,29  |
| 706,4347 |  | 100,24  | 2,53  |
| 706,5933 |  | 241,09  | 6,07  |
| 707,445  |  | 120,78  | 3,04  |
| 707,5004 |  | 136,65  | 3,44  |
| 707,5754 |  | 107,36  | 2,7   |
| 709,5287 |  | 169,26  | 4,26  |
| 711,5659 |  | 112,75  | 2,84  |
| 716,5583 |  | 164,57  | 4,15  |
| 717,549  |  | 697,02  | 17,56 |
| 717,5945 |  | 197,7   | 4,98  |
| 718,5463 |  | 911,63  | 22,97 |
| 718,6269 |  | 192,29  | 4,84  |
| 719,5414 |  | 530,39  | 13,36 |
| 720,59   |  | 1005,91 | 25,34 |
| 720,6408 |  | 184,02  | 4,64  |
| 720,8936 |  | 111,94  | 2,82  |
| 721,5875 |  | 567,91  | 14,31 |
| 722,553  |  | 151,21  | 3,81  |
| 722,609  |  | 155,64  | 3,92  |
| 723,424  |  | 197,44  | 4,97  |
| 723,4981 |  | 385,67  | 9,72  |
| 723,5437 |  | 101,48  | 2,56  |
| 723,5769 |  | 168,91  | 4,26  |
| 724,462  |  | 132     | 3,33  |
| 724,5315 |  | 208,08  | 5,24  |
| 725,5444 |  | 588,36  | 14,82 |
| 726,5445 |  | 247,45  | 6,23  |
| 726,598  |  | 109,05  | 2,75  |
| 732,5573 |  | 190     | 4,79  |
| 733,5293 |  | 166,01  | 4,18  |
| 734,5795 |  | 1262,06 | 31,8  |
| 735,5748 |  | 684,7   | 17,25 |
| 735,6223 |  | 158,86  | 4     |
| 736,5689 |  | 275,65  | 6,95  |
| 737,5079 |  | 194,99  | 4,91  |

|          |  |        |       |
|----------|--|--------|-------|
| 738,5175 |  | 120,91 | 3,05  |
| 739,5377 |  | 820,98 | 20,69 |
| 740,5229 |  | 299,53 | 7,55  |
| 740,5684 |  | 308,12 | 7,76  |
| 741,5011 |  | 234,79 | 5,92  |
| 741,5581 |  | 291,03 | 7,33  |
| 742,5301 |  | 133,88 | 3,37  |
| 748,5673 |  | 268,23 | 6,76  |
| 749,5562 |  | 176,95 | 4,46  |
| 750,5729 |  | 112,24 | 2,83  |
| 752,5845 |  | 161,49 | 4,07  |
| 753,5409 |  | 154,16 | 3,88  |
| 753,6221 |  | 118,18 | 2,98  |
| 755,5249 |  | 230,49 | 5,81  |
| 756,5135 |  | 134,27 | 3,38  |
| 757,5245 |  | 190,15 | 4,79  |
| 758,5818 |  | 181,63 | 4,58  |
| 759,5736 |  | 261,42 | 6,59  |
| 760,5538 |  | 144,31 | 3,64  |
| 761,5107 |  | 131,76 | 3,32  |
| 761,5844 |  | 164,92 | 4,16  |
| 762,6278 |  | 279,12 | 7,03  |
| 763,6133 |  | 247,88 | 6,25  |
| 766,5566 |  | 124,41 | 3,13  |
| 767,5764 |  | 124,93 | 3,15  |
| 773,5647 |  | 117,76 | 2,97  |
| 774,5032 |  | 102,07 | 2,57  |
| 774,5739 |  | 227,47 | 5,73  |
| 775,5088 |  | 125,95 | 3,17  |
| 775,5705 |  | 317,9  | 8,01  |
| 776,5958 |  | 392,43 | 9,89  |
| 777,6002 |  | 458,69 | 11,56 |
| 778,592  |  | 278    | 7     |
| 778,6238 |  | 188,43 | 4,75  |
| 779,4503 |  | 166,09 | 4,18  |
| 779,5145 |  | 164,96 | 4,16  |
| 779,594  |  | 245,41 | 6,18  |
| 780,625  |  | 203,5  | 5,13  |
| 780,6897 |  | 104,62 | 2,64  |
| 781,5387 |  | 124,73 | 3,14  |
| 781,6266 |  | 185,15 | 4,67  |
| 783,5603 |  | 136,49 | 3,44  |
| 790,5908 |  | 297,57 | 7,5   |
| 791,5923 |  | 418,77 | 10,55 |
| 792,593  |  | 821,9  | 20,71 |
| 793,5777 |  | 450,66 | 11,35 |
| 793,6609 |  | 155,15 | 3,91  |
| 794,6321 |  | 955,62 | 24,08 |
| 795,6177 |  | 627,58 | 15,81 |
| 795,6936 |  | 109,6  | 2,76  |
| 796,6276 |  | 175,78 | 4,43  |
| 797,5404 |  | 368,41 | 9,28  |
| 797,5983 |  | 261,92 | 6,6   |
| 798,5464 |  | 153,69 | 3,87  |

|          |  |        |       |
|----------|--|--------|-------|
| 798,5984 |  | 177,89 | 4,48  |
| 799,5833 |  | 531,47 | 13,39 |
| 799,6465 |  | 104,57 | 2,63  |
| 800,5955 |  | 281,01 | 7,08  |
| 801,5738 |  | 101,55 | 2,56  |
| 806,5934 |  | 201,45 | 5,08  |
| 807,6033 |  | 127,28 | 3,21  |
| 808,6112 |  | 1062   | 26,76 |
| 808,6624 |  | 144,89 | 3,65  |
| 809,6101 |  | 760,09 | 19,15 |
| 810,5176 |  | 116,31 | 2,93  |
| 810,6002 |  | 355,1  | 8,95  |
| 811,5314 |  | 185,54 | 4,67  |
| 811,591  |  | 117,52 | 2,96  |
| 811,6511 |  | 102,9  | 2,59  |
| 812,5385 |  | 112,33 | 2,83  |
| 813,5679 |  | 730,14 | 18,4  |
| 813,639  |  | 103,49 | 2,61  |
| 814,5584 |  | 300,96 | 7,58  |
| 814,6069 |  | 170,57 | 4,3   |
| 815,5531 |  | 280,77 | 7,07  |
| 816,5624 |  | 106,32 | 2,68  |
| 816,6356 |  | 108,34 | 2,73  |
| 817,5868 |  | 112,24 | 2,83  |
| 822,6044 |  | 175,39 | 4,42  |
| 823,5906 |  | 145,35 | 3,66  |
| 824,5879 |  | 165,85 | 4,18  |
| 826,6109 |  | 252,05 | 6,35  |
| 827,5887 |  | 147,22 | 3,71  |
| 829,5554 |  | 166,67 | 4,2   |
| 831,5558 |  | 178,77 | 4,5   |
| 832,5769 |  | 121,57 | 3,06  |
| 833,6075 |  | 113,14 | 2,85  |
| 834,6195 |  | 174,67 | 4,4   |
| 835,5394 |  | 100,31 | 2,53  |
| 835,6473 |  | 107,73 | 2,71  |
| 836,6535 |  | 135,48 | 3,41  |
| 837,6537 |  | 154,4  | 3,89  |
| 840,6312 |  | 107,17 | 2,7   |
| 841,626  |  | 195,41 | 4,92  |
| 848,5624 |  | 169,35 | 4,27  |
| 848,6187 |  | 139,52 | 3,52  |
| 849,6003 |  | 178,75 | 4,5   |
| 850,6136 |  | 170,52 | 4,3   |
| 850,6625 |  | 171,56 | 4,32  |
| 851,6373 |  | 257,65 | 6,49  |
| 852,6371 |  | 271,32 | 6,84  |
| 853,5669 |  | 140,03 | 3,53  |
| 853,636  |  | 165,59 | 4,17  |
| 854,6754 |  | 144,77 | 3,65  |
| 855,5762 |  | 120,49 | 3,04  |
| 855,6276 |  | 106,78 | 2,69  |
| 857,6121 |  | 105,17 | 2,65  |
| 864,6269 |  | 211,16 | 5,32  |

|          |  |        |       |
|----------|--|--------|-------|
| 864,6864 |  | 133,67 | 3,37  |
| 865,6295 |  | 289,33 | 7,29  |
| 866,6299 |  | 522,07 | 13,15 |
| 867,597  |  | 165,57 | 4,17  |
| 867,655  |  | 214,02 | 5,39  |
| 868,6603 |  | 622,45 | 15,68 |
| 869,5698 |  | 168,28 | 4,24  |
| 869,6556 |  | 493,8  | 12,44 |
| 870,6508 |  | 174,54 | 4,4   |
| 871,5958 |  | 239,78 | 6,04  |
| 871,6716 |  | 107,79 | 2,72  |
| 873,6247 |  | 292,69 | 7,37  |
| 874,6292 |  | 169,74 | 4,28  |
| 882,6459 |  | 678,91 | 17,11 |
| 882,7029 |  | 235,43 | 5,93  |
| 883,6459 |  | 433,9  | 10,93 |
| 883,7139 |  | 106,15 | 2,67  |
| 884,6443 |  | 279,34 | 7,04  |
| 885,6028 |  | 101,69 | 2,56  |
| 886,6514 |  | 115,87 | 2,92  |
| 887,6079 |  | 436,4  | 11    |
| 887,6722 |  | 136,3  | 3,43  |
| 888,6235 |  | 269,66 | 6,79  |
| 889,5892 |  | 213,72 | 5,38  |
| 896,6818 |  | 109,41 | 2,76  |
| 897,6521 |  | 102,7  | 2,59  |
| 898,6278 |  | 163,81 | 4,13  |
| 899,6264 |  | 105,71 | 2,66  |
| 900,6455 |  | 232,45 | 5,86  |
| 900,7118 |  | 133,86 | 3,37  |
| 901,646  |  | 174,32 | 4,39  |
| 905,5996 |  | 160,74 | 4,05  |
| 906,6195 |  | 103    | 2,6   |
| 907,6211 |  | 114,65 | 2,89  |
| 911,6836 |  | 108,96 | 2,75  |
| 914,6318 |  | 145,73 | 3,67  |
| 923,6124 |  | 109,58 | 2,76  |
| 923,667  |  | 129,67 | 3,27  |
| 924,6537 |  | 108,43 | 2,73  |
| 924,7298 |  | 110,72 | 2,79  |
| 925,6654 |  | 141,81 | 3,57  |
| 926,6718 |  | 110,12 | 2,77  |
| 927,6168 |  | 133,53 | 3,36  |
| 928,6573 |  | 106,66 | 2,69  |
| 928,7528 |  | 128,93 | 3,25  |
| 929,6402 |  | 111,12 | 2,8   |
| 938,6538 |  | 101,45 | 2,56  |
| 938,6981 |  | 106,72 | 2,69  |
| 939,6603 |  | 140,23 | 3,53  |
| 940,6685 |  | 283,14 | 7,13  |
| 941,5971 |  | 122,86 | 3,1   |
| 941,6613 |  | 210,45 | 5,3   |
| 942,6943 |  | 286,07 | 7,21  |
| 943,6775 |  | 286,57 | 7,22  |

|           |  |        |       |
|-----------|--|--------|-------|
| 944,7006  |  | 110,14 | 2,78  |
| 944,7873  |  | 108,3  | 2,73  |
| 945,6169  |  | 139,55 | 3,52  |
| 947,6484  |  | 177,19 | 4,46  |
| 956,6981  |  | 498,02 | 12,55 |
| 956,7847  |  | 160,13 | 4,03  |
| 957,6594  |  | 111,73 | 2,82  |
| 957,7035  |  | 213,91 | 5,39  |
| 957,7795  |  | 100,28 | 2,53  |
| 958,6837  |  | 145,07 | 3,66  |
| 958,7865  |  | 211,74 | 5,34  |
| 959,6629  |  | 154,35 | 3,89  |
| 959,8148  |  | 117,78 | 2,97  |
| 960,6932  |  | 113,27 | 2,85  |
| 961,6281  |  | 140,09 | 3,53  |
| 961,6632  |  | 188,12 | 4,74  |
| 962,636   |  | 136,59 | 3,44  |
| 962,7257  |  | 112,43 | 2,83  |
| 972,7812  |  | 217,28 | 5,47  |
| 973,7956  |  | 109,54 | 2,76  |
| 974,7083  |  | 266,78 | 6,72  |
| 975,6925  |  | 209,21 | 5,27  |
| 979,6665  |  | 120,07 | 3,03  |
| 984,7443  |  | 112,59 | 2,84  |
| 988,6709  |  | 115,23 | 2,9   |
| 996,6328  |  | 112,9  | 2,84  |
| 997,6542  |  | 104,22 | 2,63  |
| 1012,7121 |  | 144,09 | 3,63  |
| 1013,7221 |  | 123,05 | 3,1   |
| 1014,7619 |  | 124,25 | 3,13  |
| 1015,7003 |  | 162,39 | 4,09  |
| 1016,7366 |  | 121,25 | 3,06  |
| 1016,8116 |  | 274,38 | 6,91  |
| 1017,7052 |  | 176,13 | 4,44  |
| 1017,7928 |  | 133,12 | 3,35  |
| 1030,7133 |  | 149,69 | 3,77  |
| 1030,7597 |  | 130,86 | 3,3   |
| 1030,8434 |  | 251,56 | 6,34  |
| 1031,7184 |  | 154,11 | 3,88  |
| 1031,8438 |  | 188,65 | 4,75  |
| 1032,7082 |  | 121,16 | 3,05  |
| 1032,8267 |  | 359,74 | 9,06  |
| 1033,8219 |  | 219,05 | 5,52  |
| 1034,8263 |  | 123,43 | 3,11  |
| 1035,6763 |  | 126,23 | 3,18  |
| 1037,7624 |  | 194,34 | 4,9   |
| 1046,8183 |  | 298,7  | 7,53  |
| 1047,8033 |  | 208,64 | 5,26  |
| 1048,7661 |  | 157,03 | 3,96  |
| 1049,733  |  | 105,7  | 2,66  |
| 1049,8063 |  | 107,06 | 2,7   |
| 1051,7699 |  | 109,57 | 2,76  |
| 1052,7675 |  | 144,27 | 3,64  |
| 1088,8183 |  | 139,31 | 3,51  |

|           |  |        |      |
|-----------|--|--------|------|
| 1090,7694 |  | 101,42 | 2,56 |
| 1090,8454 |  | 122,28 | 3,08 |
| 1091,8416 |  | 111,89 | 2,82 |
| 1104,8298 |  | 169,07 | 4,26 |
| 1105,8307 |  | 176,34 | 4,44 |
| 1106,8634 |  | 323,05 | 8,14 |
| 1107,8506 |  | 169,97 | 4,28 |
| 1109,7829 |  | 159,19 | 4,01 |
| 1111,8067 |  | 141,75 | 3,57 |
| 1120,8413 |  | 188,13 | 4,74 |
| 1121,8461 |  | 102,95 | 2,59 |
| 1122,7985 |  | 227,7  | 5,74 |
| 1127,7957 |  | 173,78 | 4,38 |
| 1166,9114 |  | 113,03 | 2,85 |
| 1178,8602 |  | 215,89 | 5,44 |
| 1179,8607 |  | 119,4  | 3,01 |
| 1180,8857 |  | 206,3  | 5,2  |
| 1181,8906 |  | 116,46 | 2,93 |
| 1182,8851 |  | 114,6  | 2,89 |
| 1185,8488 |  | 116    | 2,92 |
| 1194,8825 |  | 191,88 | 4,83 |
| 1196,8788 |  | 129,06 | 3,25 |
| 1199,8442 |  | 140,47 | 3,54 |
| 1252,8861 |  | 116,03 | 2,92 |
| 1254,934  |  | 102,52 | 2,58 |

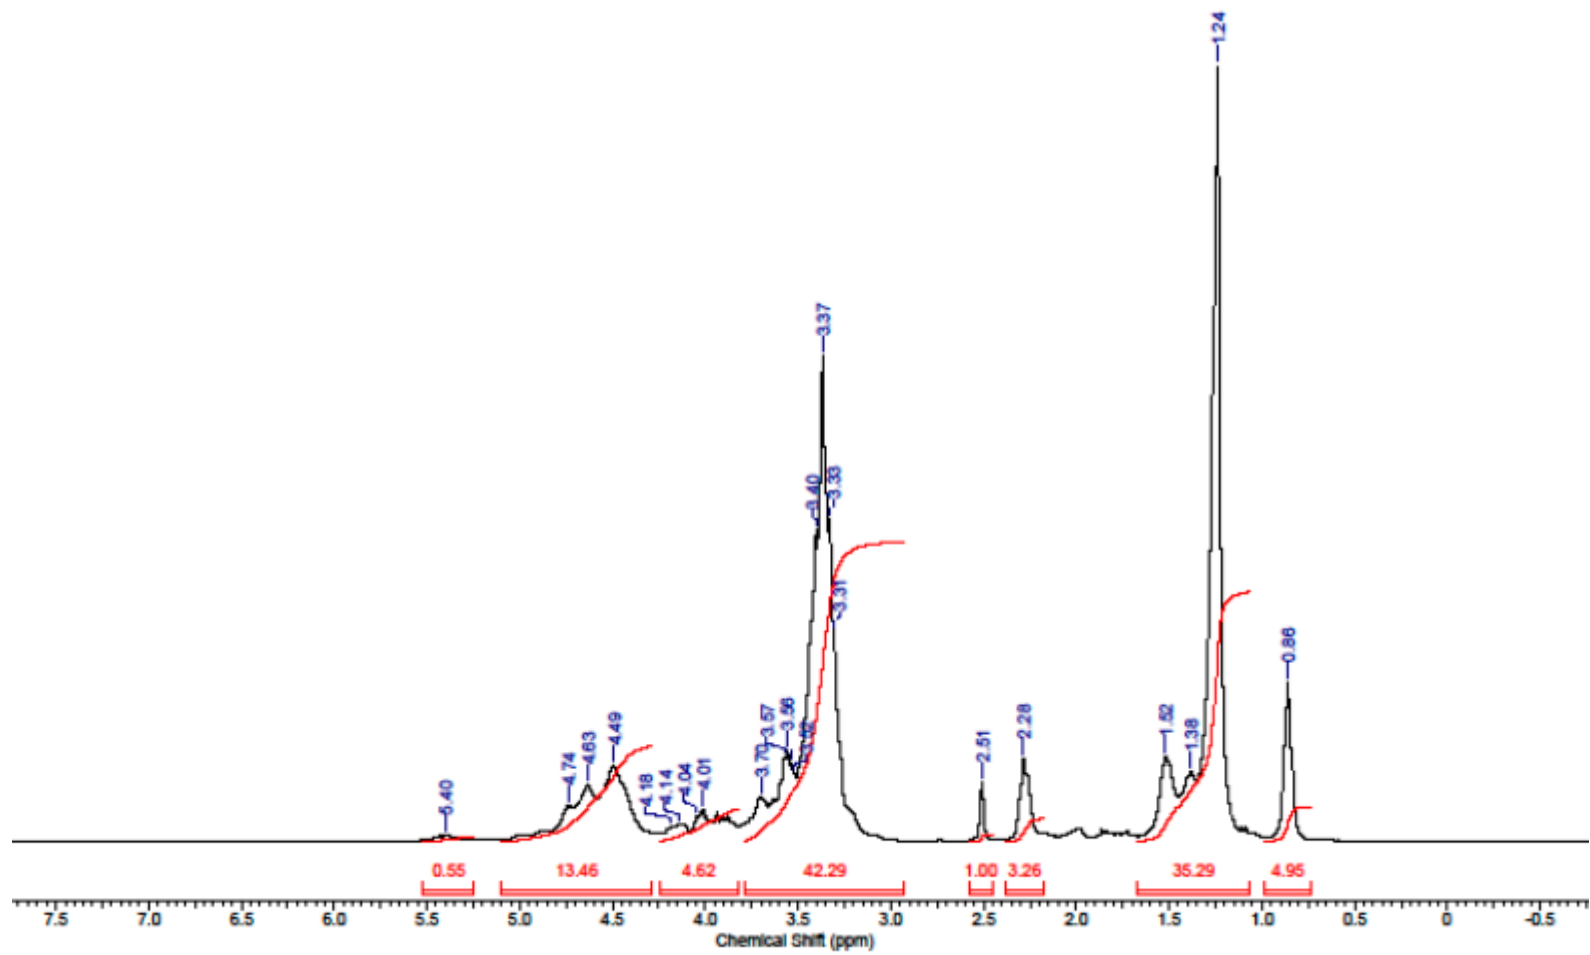

*Esters 18c (Polyglycerol + epoxidized soybean oil FAME 1:2)*

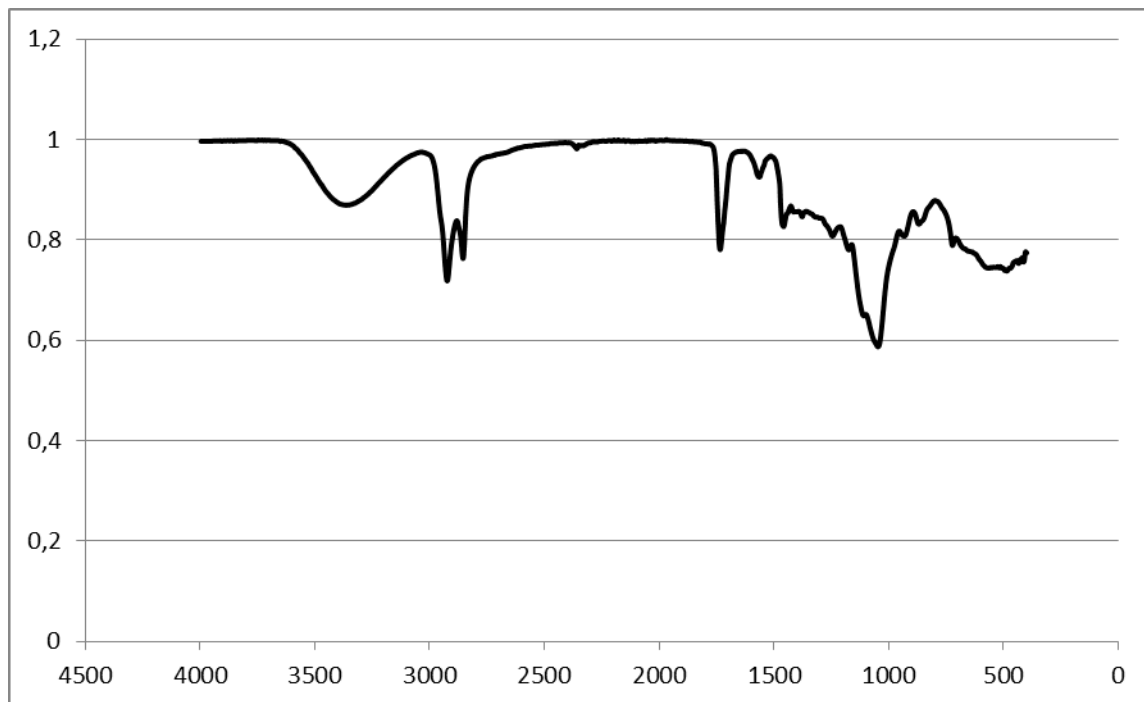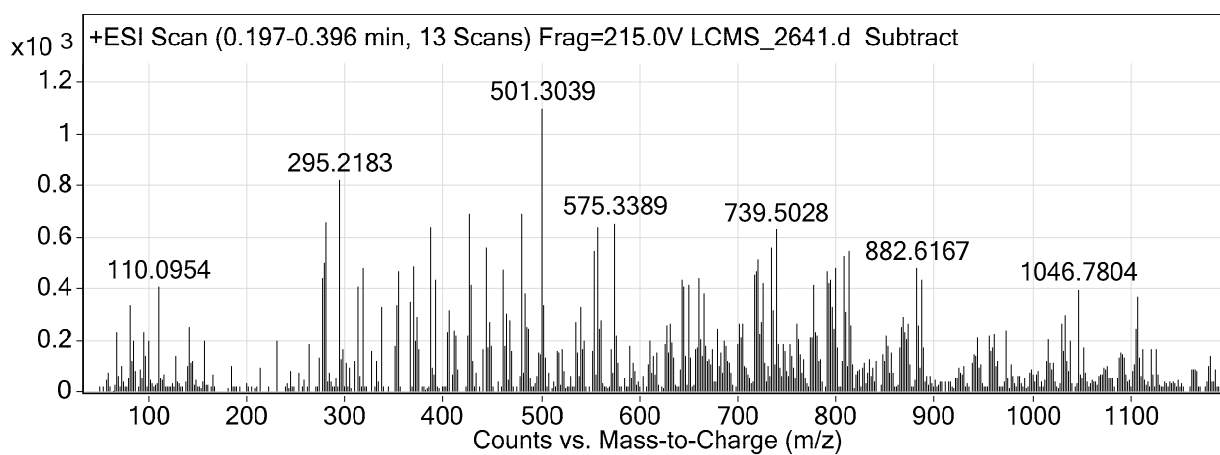

| m/z      | Species | Abund  | Abund % |
|----------|---------|--------|---------|
| 72,1004  |         | 101,21 | 9,23    |
| 81,0658  |         | 100,66 | 9,18    |
| 82,0657  |         | 333,78 | 30,45   |
| 83,1061  |         | 120,01 | 10,95   |
| 84,0999  |         | 198,09 | 18,07   |
| 95,0787  |         | 230,6  | 21,04   |
| 97,0884  |         | 137,35 | 12,53   |
| 100,1718 |         | 194,66 | 17,76   |
| 100,2637 |         | 110,38 | 10,07   |
| 110,0954 |         | 404,6  | 36,91   |

|          |  |        |       |
|----------|--|--------|-------|
| 128,2103 |  | 138,44 | 12,63 |
| 142,2658 |  | 171,54 | 15,65 |
| 142,2897 |  | 247,11 | 22,54 |
| 143,2427 |  | 112,81 | 10,29 |
| 144,1627 |  | 115,48 | 10,53 |
| 156,1937 |  | 196,87 | 17,96 |
| 230,2379 |  | 198,24 | 18,08 |
| 263,0993 |  | 182,95 | 16,69 |
| 263,2281 |  | 175,46 | 16,01 |
| 274,2671 |  | 134,16 | 12,24 |
| 277,2054 |  | 440,97 | 40,22 |
| 277,2376 |  | 211,7  | 19,31 |
| 279,2228 |  | 496    | 45,25 |
| 279,256  |  | 180,99 | 16,51 |
| 281,237  |  | 657,53 | 59,98 |
| 281,2715 |  | 276,77 | 25,25 |
| 295,2183 |  | 820,58 | 74,85 |
| 295,2535 |  | 365,13 | 33,31 |
| 296,2229 |  | 127,39 | 11,62 |
| 298,3359 |  | 101,19 | 9,23  |
| 298,3766 |  | 165    | 15,05 |
| 301,1194 |  | 108,71 | 9,92  |
| 309,2306 |  | 115,56 | 10,54 |
| 313,225  |  | 294,45 | 26,86 |
| 313,261  |  | 404,12 | 36,86 |
| 313,2981 |  | 111,1  | 10,13 |
| 319,1276 |  | 476,42 | 43,46 |
| 319,1561 |  | 131,15 | 11,96 |
| 327,2399 |  | 157,96 | 14,41 |
| 332,3189 |  | 121,16 | 11,05 |
| 337,1344 |  | 326,35 | 29,77 |
| 351,242  |  | 177,57 | 16,2  |
| 351,2854 |  | 106,62 | 9,73  |
| 353,2542 |  | 337,25 | 30,76 |
| 353,2971 |  | 118,03 | 10,77 |
| 355,2714 |  | 463,18 | 42,25 |
| 355,3178 |  | 182,34 | 16,63 |
| 367,2358 |  | 349,31 | 31,86 |
| 369,2512 |  | 483,25 | 44,08 |
| 369,2869 |  | 138,36 | 12,62 |
| 371,2672 |  | 196,58 | 17,93 |
| 373,2787 |  | 290,72 | 26,52 |
| 373,3142 |  | 112,98 | 10,31 |
| 375,1533 |  | 163,32 | 14,9  |
| 387,2722 |  | 636,45 | 58,06 |
| 387,2974 |  | 284,51 | 25,95 |
| 393,1625 |  | 431,94 | 39,4  |
| 393,2008 |  | 218,1  | 19,9  |
| 405,2725 |  | 226,8  | 20,69 |
| 405,3031 |  | 318,01 | 29,01 |
| 411,1711 |  | 238,08 | 21,72 |
| 411,2847 |  | 146,44 | 13,36 |
| 413,274  |  | 217,1  | 19,8  |
| 425,275  |  | 219,19 | 19,99 |

|          |  |         |       |
|----------|--|---------|-------|
| 427,2533 |  | 119,49  | 10,9  |
| 427,2788 |  | 687,83  | 62,74 |
| 428,2828 |  | 160,74  | 14,66 |
| 429,312  |  | 411,07  | 37,5  |
| 429,3498 |  | 114,89  | 10,48 |
| 441,2674 |  | 164,84  | 15,04 |
| 443,2906 |  | 559,97  | 51,08 |
| 443,3325 |  | 161,21  | 14,71 |
| 444,2924 |  | 107,12  | 9,77  |
| 445,3027 |  | 167,27  | 15,26 |
| 447,3209 |  | 268,51  | 24,49 |
| 447,3646 |  | 128,54  | 11,73 |
| 449,1882 |  | 179,66  | 16,39 |
| 461,2944 |  | 283,98  | 25,91 |
| 461,3262 |  | 470,41  | 42,91 |
| 462,3076 |  | 140,94  | 12,86 |
| 462,3441 |  | 123,26  | 11,24 |
| 463,3147 |  | 174,57  | 15,92 |
| 465,3275 |  | 303,04  | 27,64 |
| 467,1969 |  | 275,61  | 25,14 |
| 467,2802 |  | 111,72  | 10,19 |
| 469,2998 |  | 157,77  | 14,39 |
| 479,3151 |  | 690,32  | 62,97 |
| 479,351  |  | 303,7   | 27,7  |
| 480,3031 |  | 180,91  | 16,5  |
| 480,3442 |  | 163,01  | 14,87 |
| 483,2777 |  | 207,83  | 18,96 |
| 483,3108 |  | 379,68  | 34,63 |
| 485,2971 |  | 248,23  | 22,64 |
| 487,304  |  | 240,32  | 21,92 |
| 487,3336 |  | 215,3   | 19,64 |
| 496,3808 |  | 150,1   | 13,69 |
| 499,2853 |  | 144,27  | 13,16 |
| 501,3039 |  | 1096,25 | 100   |
| 502,2994 |  | 334,4   | 30,5  |
| 502,3451 |  | 111,79  | 10,2  |
| 503,343  |  | 133,22  | 12,15 |
| 515,2994 |  | 159,41  | 14,54 |
| 517,3127 |  | 150,8   | 13,76 |
| 521,3542 |  | 164,15  | 14,97 |
| 535,3373 |  | 269,41  | 24,58 |
| 535,3841 |  | 122,53  | 11,18 |
| 536,3532 |  | 118,19  | 10,78 |
| 537,3541 |  | 148,63  | 13,56 |
| 539,3623 |  | 329,62  | 30,07 |
| 541,2288 |  | 164,17  | 14,98 |
| 541,314  |  | 142,53  | 13    |
| 543,3284 |  | 199,58  | 18,21 |
| 552,3746 |  | 155,57  | 14,19 |
| 553,3505 |  | 544,06  | 49,63 |
| 553,3951 |  | 191,38  | 17,46 |
| 554,3453 |  | 108,93  | 9,94  |
| 554,3899 |  | 142,51  | 13    |
| 557,3283 |  | 638,1   | 58,21 |

|          |  |        |       |
|----------|--|--------|-------|
| 557,3923 |  | 102,69 | 9,37  |
| 558,3256 |  | 139,27 | 12,7  |
| 559,3293 |  | 241,11 | 21,99 |
| 561,3528 |  | 278,4  | 25,4  |
| 570,3678 |  | 103,06 | 9,4   |
| 570,4071 |  | 166,65 | 15,2  |
| 571,3662 |  | 149,45 | 13,63 |
| 575,3389 |  | 652,38 | 59,51 |
| 576,341  |  | 217,43 | 19,83 |
| 578,3949 |  | 113,98 | 10,4  |
| 589,3393 |  | 176,9  | 16,14 |
| 593,4461 |  | 112,09 | 10,22 |
| 609,377  |  | 101,31 | 9,24  |
| 609,4567 |  | 106,18 | 9,69  |
| 611,4827 |  | 194,75 | 17,76 |
| 613,3869 |  | 136,83 | 12,48 |
| 617,3802 |  | 148,86 | 13,58 |
| 625,4759 |  | 181,58 | 16,56 |
| 626,4759 |  | 150,35 | 13,71 |
| 627,386  |  | 254,32 | 23,2  |
| 627,4434 |  | 238,4  | 21,75 |
| 627,5021 |  | 112,87 | 10,3  |
| 629,5012 |  | 153,45 | 14    |
| 630,484  |  | 100,71 | 9,19  |
| 631,3541 |  | 187,7  | 17,12 |
| 631,3735 |  | 262,91 | 23,98 |
| 631,4184 |  | 128,6  | 11,73 |
| 632,3642 |  | 187,09 | 17,07 |
| 633,3692 |  | 149,36 | 13,62 |
| 635,3802 |  | 130,01 | 11,86 |
| 643,4816 |  | 432,63 | 39,46 |
| 644,477  |  | 404,04 | 36,86 |
| 645,4097 |  | 145,18 | 13,24 |
| 645,4885 |  | 137,32 | 12,53 |
| 646,5339 |  | 140,52 | 12,82 |
| 649,3719 |  | 411,36 | 37,52 |
| 649,4247 |  | 139,77 | 12,75 |
| 649,475  |  | 146,47 | 13,36 |
| 650,3686 |  | 115,61 | 10,55 |
| 651,4765 |  | 132,25 | 12,06 |
| 657,474  |  | 165,3  | 15,08 |
| 658,5017 |  | 171,11 | 15,61 |
| 660,5166 |  | 438,97 | 40,04 |
| 660,5713 |  | 135,1  | 12,32 |
| 661,5143 |  | 203,92 | 18,6  |
| 663,4467 |  | 138,58 | 12,64 |
| 665,4729 |  | 381,59 | 34,81 |
| 666,4775 |  | 177,2  | 16,16 |
| 669,498  |  | 115,02 | 10,49 |
| 671,5261 |  | 125,62 | 11,46 |
| 672,5328 |  | 102,8  | 9,38  |
| 674,4961 |  | 161,3  | 14,71 |
| 674,5601 |  | 103,21 | 9,41  |
| 679,4557 |  | 245,37 | 22,38 |

|          |  |        |       |
|----------|--|--------|-------|
| 683,479  |  | 153,6  | 14,01 |
| 685,5075 |  | 194,82 | 17,77 |
| 686,5267 |  | 103,32 | 9,42  |
| 687,428  |  | 178,43 | 16,28 |
| 688,5427 |  | 125,34 | 11,43 |
| 689,387  |  | 117,08 | 10,68 |
| 691,4047 |  | 114,33 | 10,43 |
| 699,521  |  | 182,92 | 16,69 |
| 700,5179 |  | 132,21 | 12,06 |
| 701,4968 |  | 263,24 | 24,01 |
| 702,539  |  | 105,06 | 9,58  |
| 703,5132 |  | 207,8  | 18,96 |
| 703,5419 |  | 147,45 | 13,45 |
| 703,5804 |  | 117,29 | 10,7  |
| 704,4956 |  | 143,14 | 13,06 |
| 704,549  |  | 149,21 | 13,61 |
| 705,3855 |  | 261,78 | 23,88 |
| 705,4327 |  | 226,72 | 20,68 |
| 705,5162 |  | 140,42 | 12,81 |
| 716,5057 |  | 105    | 9,58  |
| 716,5658 |  | 134,91 | 12,31 |
| 717,5192 |  | 454,52 | 41,46 |
| 718,5264 |  | 462,61 | 42,2  |
| 718,591  |  | 115,59 | 10,54 |
| 719,5216 |  | 242,84 | 22,15 |
| 720,5553 |  | 513,63 | 46,85 |
| 721,5362 |  | 225,75 | 20,59 |
| 722,5518 |  | 103,13 | 9,41  |
| 723,4005 |  | 269,25 | 24,56 |
| 723,4825 |  | 254,17 | 23,19 |
| 723,5374 |  | 105,33 | 9,61  |
| 724,4283 |  | 115,08 | 10,5  |
| 725,504  |  | 421,11 | 38,41 |
| 726,4998 |  | 126,58 | 11,55 |
| 727,5435 |  | 114,58 | 10,45 |
| 734,5356 |  | 560,49 | 51,13 |
| 734,5984 |  | 325,83 | 29,72 |
| 735,5352 |  | 317,38 | 28,95 |
| 737,4937 |  | 103,53 | 9,44  |
| 739,5028 |  | 626,94 | 57,19 |
| 740,4828 |  | 181,56 | 16,56 |
| 740,5405 |  | 170,78 | 15,58 |
| 741,5285 |  | 144    | 13,14 |
| 745,575  |  | 183,56 | 16,74 |
| 748,537  |  | 157,51 | 14,37 |
| 753,478  |  | 183,44 | 16,73 |
| 755,4794 |  | 136,89 | 12,49 |
| 759,5509 |  | 264,1  | 24,09 |
| 760,5685 |  | 185,64 | 16,93 |
| 761,4696 |  | 104,05 | 9,49  |
| 761,5586 |  | 108,34 | 9,88  |
| 762,5818 |  | 202,68 | 18,49 |
| 763,5876 |  | 146,59 | 13,37 |
| 767,5519 |  | 124,02 | 11,31 |

|          |  |        |       |
|----------|--|--------|-------|
| 773,5404 |  | 195,3  | 17,82 |
| 774,5359 |  | 211,57 | 19,3  |
| 775,5326 |  | 213,01 | 19,43 |
| 776,5638 |  | 268,17 | 24,46 |
| 777,5627 |  | 415,61 | 37,91 |
| 778,5612 |  | 231,71 | 21,14 |
| 779,4323 |  | 151,75 | 13,84 |
| 779,5007 |  | 178,5  | 16,28 |
| 779,5889 |  | 131,75 | 12,02 |
| 781,5198 |  | 216,88 | 19,78 |
| 781,5841 |  | 142    | 12,95 |
| 782,5272 |  | 116,76 | 10,65 |
| 783,5434 |  | 127,74 | 11,65 |
| 790,5684 |  | 283,7  | 25,88 |
| 791,5582 |  | 466,32 | 42,54 |
| 792,5639 |  | 418,38 | 38,16 |
| 793,5545 |  | 257,19 | 23,46 |
| 794,5842 |  | 429,99 | 39,22 |
| 794,6661 |  | 140,45 | 12,81 |
| 795,5473 |  | 330,69 | 30,17 |
| 796,5462 |  | 111,27 | 10,15 |
| 797,4299 |  | 129,72 | 11,83 |
| 797,5095 |  | 225,27 | 20,55 |
| 797,5475 |  | 241,95 | 22,07 |
| 798,5144 |  | 162,02 | 14,78 |
| 798,5837 |  | 113,8  | 10,38 |
| 799,5456 |  | 479,23 | 43,72 |
| 800,5416 |  | 170,11 | 15,52 |
| 806,5662 |  | 116,7  | 10,65 |
| 808,5644 |  | 524,86 | 47,88 |
| 808,6162 |  | 162,15 | 14,79 |
| 809,5631 |  | 309,32 | 28,22 |
| 809,6218 |  | 127,76 | 11,65 |
| 813,5299 |  | 545,97 | 49,8  |
| 813,5938 |  | 183,91 | 16,78 |
| 814,5301 |  | 255,21 | 23,28 |
| 814,5811 |  | 108,8  | 9,93  |
| 815,5358 |  | 180,42 | 16,46 |
| 817,5819 |  | 102,45 | 9,35  |
| 829,5244 |  | 110,9  | 10,12 |
| 834,599  |  | 122,22 | 11,15 |
| 841,5799 |  | 120,4  | 10,98 |
| 848,5804 |  | 145,41 | 13,26 |
| 849,5574 |  | 117,3  | 10,7  |
| 850,6046 |  | 185,18 | 16,89 |
| 851,595  |  | 214,83 | 19,6  |
| 852,6274 |  | 175,19 | 15,98 |
| 853,5399 |  | 152,6  | 13,92 |
| 855,5595 |  | 150,9  | 13,77 |
| 855,6132 |  | 113,02 | 10,31 |
| 864,5847 |  | 171,9  | 15,68 |
| 865,5824 |  | 163,76 | 14,94 |
| 866,5715 |  | 100,42 | 9,16  |
| 866,6106 |  | 247,42 | 22,57 |

|           |  |        |       |
|-----------|--|--------|-------|
| 867,5865  |  | 139,66 | 12,74 |
| 868,6124  |  | 285,71 | 26,06 |
| 869,5791  |  | 228,08 | 20,81 |
| 869,6318  |  | 122,35 | 11,16 |
| 870,5566  |  | 109,96 | 10,03 |
| 871,5549  |  | 203,05 | 18,52 |
| 873,5738  |  | 259,18 | 23,64 |
| 874,5829  |  | 103,24 | 9,42  |
| 882,6167  |  | 477,81 | 43,59 |
| 883,6218  |  | 257,76 | 23,51 |
| 887,5601  |  | 431,1  | 39,32 |
| 888,5704  |  | 169,61 | 15,47 |
| 938,621   |  | 110,22 | 10,05 |
| 940,6336  |  | 141,1  | 12,87 |
| 942,6399  |  | 129,07 | 11,77 |
| 942,7094  |  | 139,85 | 12,76 |
| 943,6248  |  | 210,51 | 19,2  |
| 947,6114  |  | 106,78 | 9,74  |
| 956,6619  |  | 107,4  | 9,8   |
| 956,7187  |  | 218,27 | 19,91 |
| 957,6258  |  | 156,56 | 14,28 |
| 958,7483  |  | 172,64 | 15,75 |
| 961,5922  |  | 221,9  | 20,24 |
| 964,7145  |  | 120,75 | 11,01 |
| 972,7528  |  | 234,74 | 21,41 |
| 973,7186  |  | 125,69 | 11,47 |
| 977,7033  |  | 103,37 | 9,43  |
| 1014,7551 |  | 115,06 | 10,5  |
| 1016,7368 |  | 203,33 | 18,55 |
| 1017,6793 |  | 113,79 | 10,38 |
| 1017,8001 |  | 110,39 | 10,07 |
| 1021,7213 |  | 108,83 | 9,93  |
| 1029,7391 |  | 137,27 | 12,52 |
| 1030,7405 |  | 262,37 | 23,93 |
| 1031,7417 |  | 157,86 | 14,4  |
| 1032,7637 |  | 296,27 | 27,03 |
| 1032,8463 |  | 140,68 | 12,83 |
| 1033,7727 |  | 178,92 | 16,32 |
| 1035,6776 |  | 116,46 | 10,62 |
| 1037,7249 |  | 194,65 | 17,76 |
| 1046,7804 |  | 396,63 | 36,18 |
| 1047,7503 |  | 190,44 | 17,37 |
| 1051,7356 |  | 170,46 | 15,55 |
| 1052,7295 |  | 119,77 | 10,93 |
| 1075,7987 |  | 100,84 | 9,2   |
| 1088,7877 |  | 129,71 | 11,83 |
| 1089,793  |  | 115,8  | 10,56 |
| 1090,8002 |  | 150,65 | 13,74 |
| 1091,7607 |  | 145,95 | 13,31 |
| 1092,8091 |  | 132,04 | 12,04 |
| 1103,7561 |  | 104,97 | 9,58  |
| 1104,7858 |  | 240,9  | 21,98 |
| 1105,7478 |  | 112,34 | 10,25 |
| 1106,8143 |  | 369,43 | 33,7  |

|           |  |        |       |
|-----------|--|--------|-------|
| 1107,8151 |  | 178,22 | 16,26 |
| 1108,8035 |  | 133,83 | 12,21 |
| 1111,773  |  | 165,39 | 15,09 |
| 1120,8045 |  | 153,09 | 13,96 |
| 1121,7892 |  | 162,68 | 14,84 |
| 1125,7661 |  | 164,31 | 14,99 |
| 1180,8492 |  | 137,44 | 12,54 |
| 1194,8365 |  | 126,41 | 11,53 |

sm

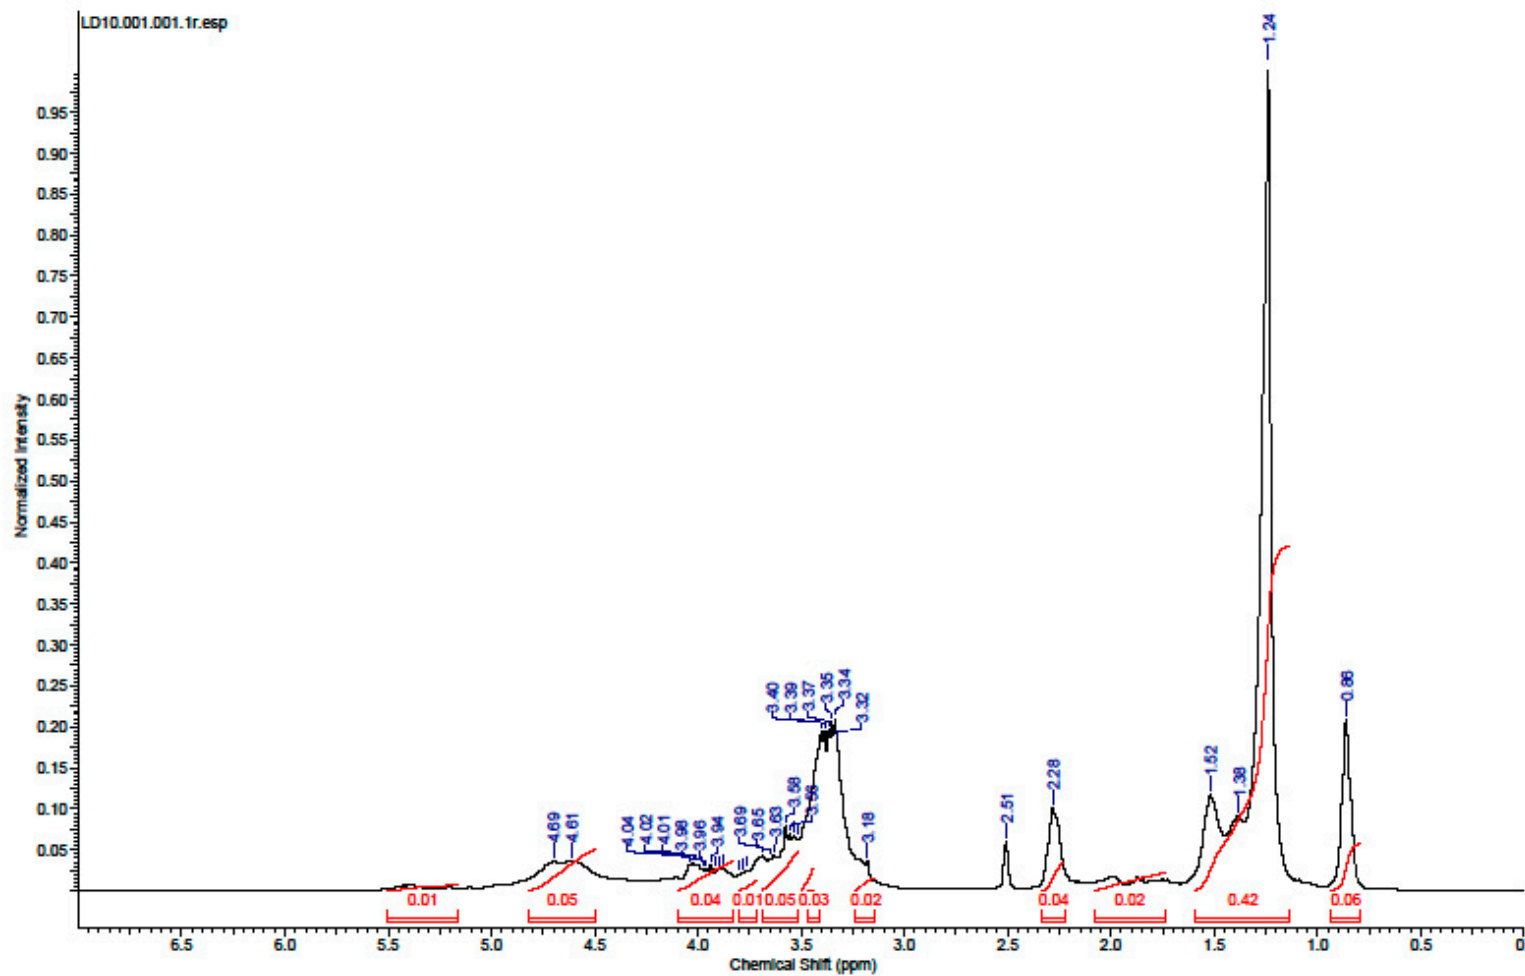

*Esters 18d (Polyglycerol + epoxidized soybean oil FAME 1:3.5)*

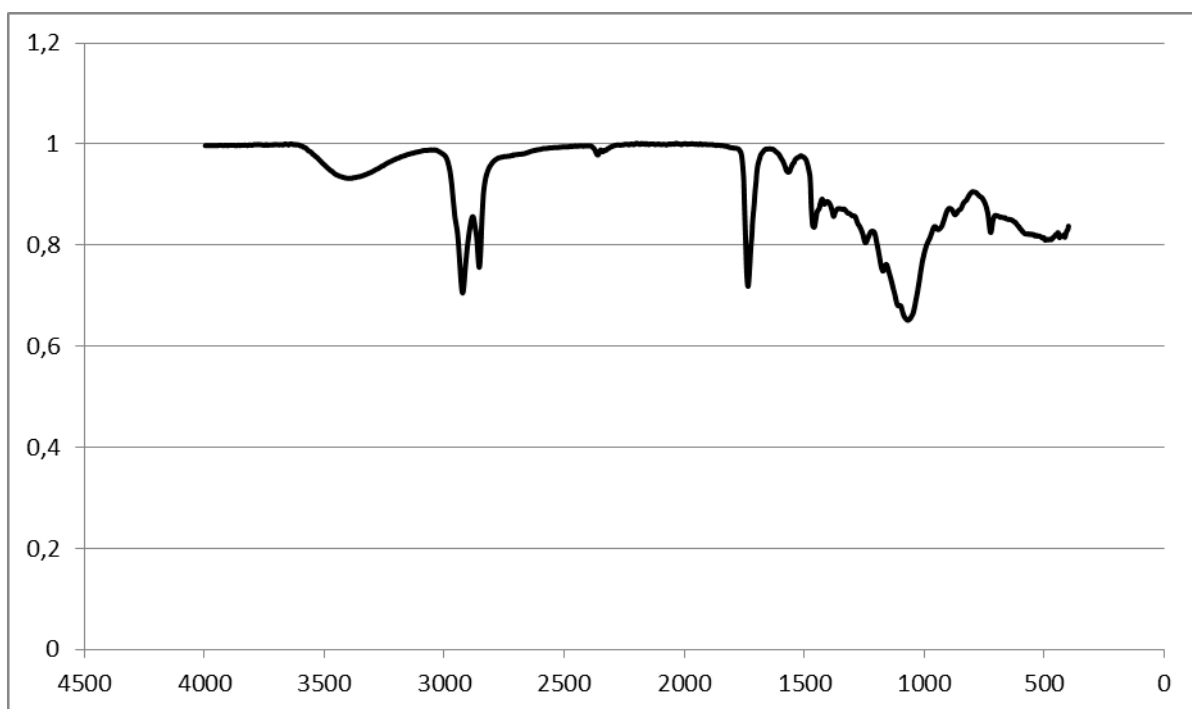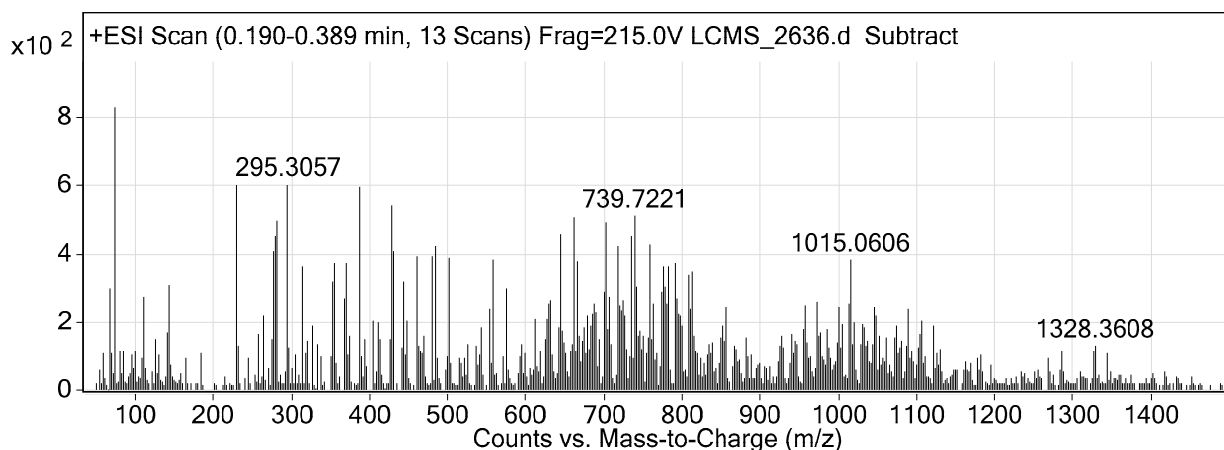

| m/z      | Species | Abund  | Abund % |
|----------|---------|--------|---------|
| 59,0822  |         | 109,73 | 13,19   |
| 67,0713  |         | 146,13 | 17,57   |
| 68,0853  |         | 299,97 | 36,06   |
| 70,0892  |         | 108,97 | 13,1    |
| 74,0811  |         | 831,88 | 100     |
| 74,0994  |         | 378,89 | 45,55   |
| 81,0906  |         | 115,93 | 13,94   |
| 84,1198  |         | 114,52 | 13,77   |
| 95,1314  |         | 102,53 | 12,32   |
| 100,2081 |         | 112,71 | 13,55   |
| 100,2427 |         | 105,49 | 12,68   |
| 111,1383 |         | 271,7  | 32,66   |
| 126,1892 |         | 147,91 | 17,78   |
| 130,1902 |         | 103,38 | 12,43   |
| 140,2561 |         | 167,25 | 20,11   |

|          |  |        |       |
|----------|--|--------|-------|
| 140,2893 |  | 109,04 | 13,11 |
| 142,3045 |  | 310,01 | 37,27 |
| 142,3302 |  | 130,65 | 15,71 |
| 142,4146 |  | 227,02 | 27,29 |
| 185,1678 |  | 109,19 | 13,13 |
| 230,3096 |  | 600,96 | 72,24 |
| 230,3383 |  | 208,75 | 25,09 |
| 231,3085 |  | 127,93 | 15,38 |
| 258,347  |  | 163,21 | 19,62 |
| 263,3041 |  | 217,92 | 26,2  |
| 263,3372 |  | 141,91 | 17,06 |
| 274,346  |  | 149,82 | 18,01 |
| 277,2887 |  | 408,48 | 49,1  |
| 277,3257 |  | 144,51 | 17,37 |
| 279,3044 |  | 453,19 | 54,48 |
| 279,3371 |  | 100,66 | 12,1  |
| 281,3229 |  | 499,13 | 60    |
| 281,3573 |  | 161,69 | 19,44 |
| 282,3855 |  | 256,02 | 30,78 |
| 295,3057 |  | 603,92 | 72,6  |
| 295,3376 |  | 154,75 | 18,6  |
| 296,3083 |  | 122,37 | 14,71 |
| 305,3807 |  | 104,98 | 12,62 |
| 313,3169 |  | 183,67 | 22,08 |
| 313,3541 |  | 364,31 | 43,79 |
| 318,3834 |  | 111,44 | 13,4  |
| 319,2199 |  | 144,81 | 17,41 |
| 327,341  |  | 187,24 | 22,51 |
| 332,458  |  | 134,02 | 16,11 |
| 337,2337 |  | 101,84 | 12,24 |
| 351,3415 |  | 101,47 | 12,2  |
| 353,3192 |  | 155,53 | 18,7  |
| 353,3572 |  | 316,36 | 38,03 |
| 355,3791 |  | 375,11 | 45,09 |
| 355,4198 |  | 102,81 | 12,36 |
| 367,3431 |  | 268,67 | 32,3  |
| 369,3596 |  | 373,59 | 44,91 |
| 371,3721 |  | 105,59 | 12,69 |
| 373,3934 |  | 157,85 | 18,97 |
| 387,394  |  | 597,06 | 71,77 |
| 393,277  |  | 150,93 | 18,14 |
| 405,4225 |  | 202,55 | 24,35 |
| 411,413  |  | 198,23 | 23,83 |
| 413,3964 |  | 147,09 | 17,68 |
| 425,4003 |  | 149,4  | 17,96 |
| 427,4073 |  | 540,31 | 64,95 |
| 427,4585 |  | 141,28 | 16,98 |
| 429,4369 |  | 405,73 | 48,77 |
| 441,396  |  | 124,73 | 14,99 |
| 443,4145 |  | 319,54 | 38,41 |
| 443,4518 |  | 177,95 | 21,39 |
| 445,4372 |  | 105,02 | 12,62 |
| 447,4538 |  | 203,62 | 24,48 |
| 461,4326 |  | 197,08 | 23,69 |

|          |  |        |       |
|----------|--|--------|-------|
| 461,4591 |  | 392,75 | 47,21 |
| 462,4577 |  | 129,48 | 15,56 |
| 465,4661 |  | 115,95 | 13,94 |
| 467,4522 |  | 108,49 | 13,04 |
| 469,4402 |  | 159,13 | 19,13 |
| 479,4576 |  | 394,59 | 47,43 |
| 483,4348 |  | 425,42 | 51,14 |
| 485,444  |  | 130,8  | 15,72 |
| 501,4481 |  | 386,1  | 46,41 |
| 501,4766 |  | 218,23 | 26,23 |
| 502,4574 |  | 142,79 | 17,16 |
| 525,4745 |  | 136,72 | 16,43 |
| 535,505  |  | 131,82 | 15,85 |
| 539,5418 |  | 106,86 | 12,85 |
| 543,4877 |  | 185,98 | 22,36 |
| 552,5403 |  | 104,48 | 12,56 |
| 553,5097 |  | 237,94 | 28,6  |
| 553,5539 |  | 112,23 | 13,49 |
| 557,4884 |  | 380,85 | 45,78 |
| 558,5046 |  | 101,02 | 12,14 |
| 575,5028 |  | 300,21 | 36,09 |
| 593,6441 |  | 132,03 | 15,87 |
| 599,5419 |  | 108,74 | 13,07 |
| 611,6749 |  | 206,58 | 24,83 |
| 612,6847 |  | 149,07 | 17,92 |
| 617,5463 |  | 113,63 | 13,66 |
| 625,6754 |  | 147,43 | 17,72 |
| 626,6695 |  | 210,19 | 25,27 |
| 627,6599 |  | 124,02 | 14,91 |
| 628,7017 |  | 255,18 | 30,68 |
| 629,7023 |  | 114,88 | 13,81 |
| 631,5484 |  | 262,74 | 31,58 |
| 631,5894 |  | 108,24 | 13,01 |
| 633,6532 |  | 106,99 | 12,86 |
| 642,6939 |  | 183,86 | 22,1  |
| 643,6817 |  | 456,75 | 54,91 |
| 643,7313 |  | 151,36 | 18,2  |
| 644,6696 |  | 178,21 | 21,42 |
| 645,6463 |  | 145,29 | 17,47 |
| 646,7251 |  | 172,92 | 20,79 |
| 647,6715 |  | 131,74 | 15,84 |
| 649,5497 |  | 138,4  | 16,64 |
| 651,6688 |  | 110,24 | 13,25 |
| 657,6645 |  | 116,36 | 13,99 |
| 658,6775 |  | 135,1  | 16,24 |
| 660,7216 |  | 508,54 | 61,13 |
| 661,723  |  | 226,14 | 27,18 |
| 663,6516 |  | 115,71 | 13,91 |
| 665,674  |  | 379,64 | 45,64 |
| 666,6696 |  | 159,97 | 19,23 |
| 667,6837 |  | 158,2  | 19,02 |
| 671,7265 |  | 142,87 | 17,17 |
| 674,689  |  | 183,55 | 22,06 |
| 675,7022 |  | 107,74 | 12,95 |

|          |  |        |       |
|----------|--|--------|-------|
| 679,6561 |  | 220,77 | 26,54 |
| 680,6589 |  | 120,26 | 14,46 |
| 683,6826 |  | 186,87 | 22,46 |
| 685,7072 |  | 221,85 | 26,67 |
| 685,7802 |  | 145,2  | 17,45 |
| 686,7334 |  | 252,14 | 30,31 |
| 688,7501 |  | 226,47 | 27,22 |
| 689,7494 |  | 101,02 | 12,14 |
| 693,7054 |  | 148,24 | 17,82 |
| 699,6968 |  | 112,33 | 13,5  |
| 699,7348 |  | 160,48 | 19,29 |
| 700,7322 |  | 288,6  | 34,69 |
| 701,7217 |  | 251,6  | 30,24 |
| 702,7497 |  | 493,25 | 59,29 |
| 703,7468 |  | 341,74 | 41,08 |
| 704,7361 |  | 156,34 | 18,79 |
| 705,667  |  | 177,69 | 21,36 |
| 705,738  |  | 150,99 | 18,15 |
| 707,7063 |  | 273,02 | 32,82 |
| 708,6878 |  | 134,83 | 16,21 |
| 716,7497 |  | 257,61 | 30,97 |
| 716,8152 |  | 105,66 | 12,7  |
| 717,7308 |  | 425,39 | 51,14 |
| 718,7375 |  | 291,77 | 35,07 |
| 719,7141 |  | 198,56 | 23,87 |
| 720,7563 |  | 249,09 | 29,94 |
| 721,7156 |  | 233,49 | 28,07 |
| 722,7093 |  | 149,38 | 17,96 |
| 723,6979 |  | 261,87 | 31,48 |
| 725,7216 |  | 217,28 | 26,12 |
| 727,7697 |  | 118,2  | 14,21 |
| 734,7639 |  | 452,89 | 54,44 |
| 735,7573 |  | 291,4  | 35,03 |
| 739,7221 |  | 511,62 | 61,5  |
| 740,7345 |  | 301,31 | 36,22 |
| 740,814  |  | 120,01 | 14,43 |
| 741,7432 |  | 213,19 | 25,63 |
| 742,7928 |  | 158,51 | 19,05 |
| 744,7962 |  | 144,19 | 17,33 |
| 745,7916 |  | 171,96 | 20,67 |
| 748,762  |  | 118,56 | 14,25 |
| 749,742  |  | 160,25 | 19,26 |
| 753,6966 |  | 100,29 | 12,06 |
| 753,7606 |  | 110,77 | 13,32 |
| 755,7166 |  | 101,91 | 12,25 |
| 756,7471 |  | 116,78 | 14,04 |
| 757,7496 |  | 153,16 | 18,41 |
| 758,7882 |  | 223,59 | 26,88 |
| 759,7759 |  | 426,38 | 51,25 |
| 760,7864 |  | 150,26 | 18,06 |
| 761,7885 |  | 116,51 | 14,01 |
| 762,807  |  | 253,61 | 30,49 |
| 763,7359 |  | 125,85 | 15,13 |
| 763,8036 |  | 169,1  | 20,33 |

|          |  |        |       |
|----------|--|--------|-------|
| 767,7564 |  | 110,63 | 13,3  |
| 773,7628 |  | 143,56 | 17,26 |
| 774,7884 |  | 287,98 | 34,62 |
| 775,774  |  | 284,2  | 34,16 |
| 776,7998 |  | 362,84 | 43,62 |
| 776,8692 |  | 115,35 | 13,87 |
| 777,7935 |  | 305,13 | 36,68 |
| 777,8667 |  | 117,33 | 14,1  |
| 778,8084 |  | 105,91 | 12,73 |
| 779,7609 |  | 255,75 | 30,74 |
| 781,7674 |  | 362,83 | 43,62 |
| 782,7585 |  | 144,75 | 17,4  |
| 790,8026 |  | 242,6  | 29,16 |
| 791,7911 |  | 371,66 | 44,68 |
| 792,7932 |  | 270,12 | 32,47 |
| 792,8562 |  | 106,71 | 12,83 |
| 793,7778 |  | 111,55 | 13,41 |
| 794,8141 |  | 184,53 | 22,18 |
| 795,7781 |  | 221,71 | 26,65 |
| 796,7507 |  | 100,35 | 12,06 |
| 796,7979 |  | 113,44 | 13,64 |
| 797,7601 |  | 216,58 | 26,04 |
| 799,7763 |  | 187,17 | 22,5  |
| 808,8119 |  | 337,18 | 40,53 |
| 809,8082 |  | 239,35 | 28,77 |
| 811,7525 |  | 107,06 | 12,87 |
| 813,7789 |  | 349,58 | 42,02 |
| 814,7677 |  | 160,15 | 19,25 |
| 817,831  |  | 112,35 | 13,51 |
| 818,8679 |  | 111,03 | 13,35 |
| 832,8373 |  | 106,68 | 12,82 |
| 833,837  |  | 134,8  | 16,2  |
| 836,8541 |  | 111,94 | 13,46 |
| 837,8534 |  | 141,07 | 16,96 |
| 839,825  |  | 118,55 | 14,25 |
| 848,8403 |  | 152,48 | 18,33 |
| 849,832  |  | 125,8  | 15,12 |
| 850,8406 |  | 188,89 | 22,71 |
| 850,9107 |  | 117,69 | 14,15 |
| 851,8518 |  | 148,67 | 17,87 |
| 853,7978 |  | 143,25 | 17,22 |
| 855,8181 |  | 243,19 | 29,23 |
| 865,8444 |  | 127,61 | 15,34 |
| 868,8693 |  | 110,22 | 13,25 |
| 869,8463 |  | 121,42 | 14,6  |
| 882,877  |  | 153,97 | 18,51 |
| 887,8684 |  | 103,06 | 12,39 |
| 924,9693 |  | 129,43 | 15,56 |
| 925,9633 |  | 107    | 12,86 |
| 927,0033 |  | 159,91 | 19,22 |
| 927,9261 |  | 105,12 | 12,64 |
| 929,9007 |  | 125,07 | 15,03 |
| 941,0078 |  | 162,3  | 19,51 |
| 942,0077 |  | 109,96 | 13,22 |

|           |  |        |       |
|-----------|--|--------|-------|
| 943,9303  |  | 144,39 | 17,36 |
| 945,9724  |  | 132,02 | 15,87 |
| 955,9793  |  | 178,7  | 21,48 |
| 956,0413  |  | 150,95 | 18,15 |
| 956,9825  |  | 250,06 | 30,06 |
| 957,9195  |  | 121,77 | 14,64 |
| 958,0056  |  | 100,03 | 12,02 |
| 960,0322  |  | 138,94 | 16,7  |
| 973,0255  |  | 257,66 | 30,97 |
| 974,0255  |  | 158,34 | 19,03 |
| 977,9748  |  | 170,09 | 20,45 |
| 978,0413  |  | 107,86 | 12,97 |
| 985,0027  |  | 180,41 | 21,69 |
| 987,9957  |  | 121,94 | 14,66 |
| 998,0559  |  | 136,94 | 16,46 |
| 999,0433  |  | 138,37 | 16,63 |
| 1001,0718 |  | 242,15 | 29,11 |
| 1002,0644 |  | 126,49 | 15,2  |
| 1006,0361 |  | 191,86 | 23,06 |
| 1013,0393 |  | 254,53 | 30,6  |
| 1014,0599 |  | 134,71 | 16,19 |
| 1014,5161 |  | 110,54 | 13,29 |
| 1015,0606 |  | 382,33 | 45,96 |
| 1016,0573 |  | 208,08 | 25,01 |
| 1017,0434 |  | 127,6  | 15,34 |
| 1017,9921 |  | 134,81 | 16,21 |
| 1018,0765 |  | 129,77 | 15,6  |
| 1020,0519 |  | 200,06 | 24,05 |
| 1021,0498 |  | 111,65 | 13,42 |
| 1029,076  |  | 133,8  | 16,08 |
| 1030,0645 |  | 157,19 | 18,9  |
| 1031,0632 |  | 195,28 | 23,47 |
| 1033,093  |  | 184,94 | 22,23 |
| 1034,0515 |  | 173,48 | 20,85 |
| 1036,0005 |  | 129,57 | 15,58 |
| 1036,0817 |  | 112,72 | 13,55 |
| 1038,038  |  | 143,03 | 17,19 |
| 1043,0454 |  | 132,57 | 15,94 |
| 1046,0341 |  | 134,84 | 16,21 |
| 1047,0708 |  | 244,67 | 29,41 |
| 1048,0601 |  | 220,76 | 26,54 |
| 1049,0624 |  | 113,89 | 13,69 |
| 1052,0383 |  | 158,22 | 19,02 |
| 1053,0396 |  | 139,13 | 16,72 |
| 1062,079  |  | 154,84 | 18,61 |
| 1071,0895 |  | 125,04 | 15,03 |
| 1072,0805 |  | 153,61 | 18,47 |
| 1073,0921 |  | 155,49 | 18,69 |
| 1075,1195 |  | 189,55 | 22,79 |
| 1076,1101 |  | 109,43 | 13,15 |
| 1078,051  |  | 124,01 | 14,91 |
| 1080,1006 |  | 144,9  | 17,42 |
| 1087,1097 |  | 127,79 | 15,36 |
| 1088,0734 |  | 110,96 | 13,34 |

|           |  |        |       |
|-----------|--|--------|-------|
| 1089,1236 |  | 237,5  | 28,55 |
| 1090,1212 |  | 187,13 | 22,49 |
| 1094,0713 |  | 115,75 | 13,91 |
| 1103,1164 |  | 126,7  | 15,23 |
| 1104,1017 |  | 164,48 | 19,77 |
| 1105,1188 |  | 164,97 | 19,83 |
| 1106,1411 |  | 102,97 | 12,38 |
| 1107,1395 |  | 204,04 | 24,53 |
| 1112,1051 |  | 101,62 | 12,22 |
| 1121,139  |  | 187,21 | 22,5  |
| 1122,1347 |  | 129,91 | 15,62 |
| 1126,0876 |  | 109,21 | 13,13 |
| 1131,1315 |  | 121,14 | 14,56 |
| 1182,1712 |  | 105,13 | 12,64 |
| 1285,3341 |  | 113,69 | 13,67 |
| 1327,3811 |  | 114,96 | 13,82 |
| 1328,3608 |  | 130,08 | 15,64 |
| 1343,3759 |  | 107,84 | 12,96 |

This report was created by ACD/NMR Processor Academic Edition. For more information go to [www.acdlabs.com/nmrproc/](http://www.acdlabs.com/nmrproc/)

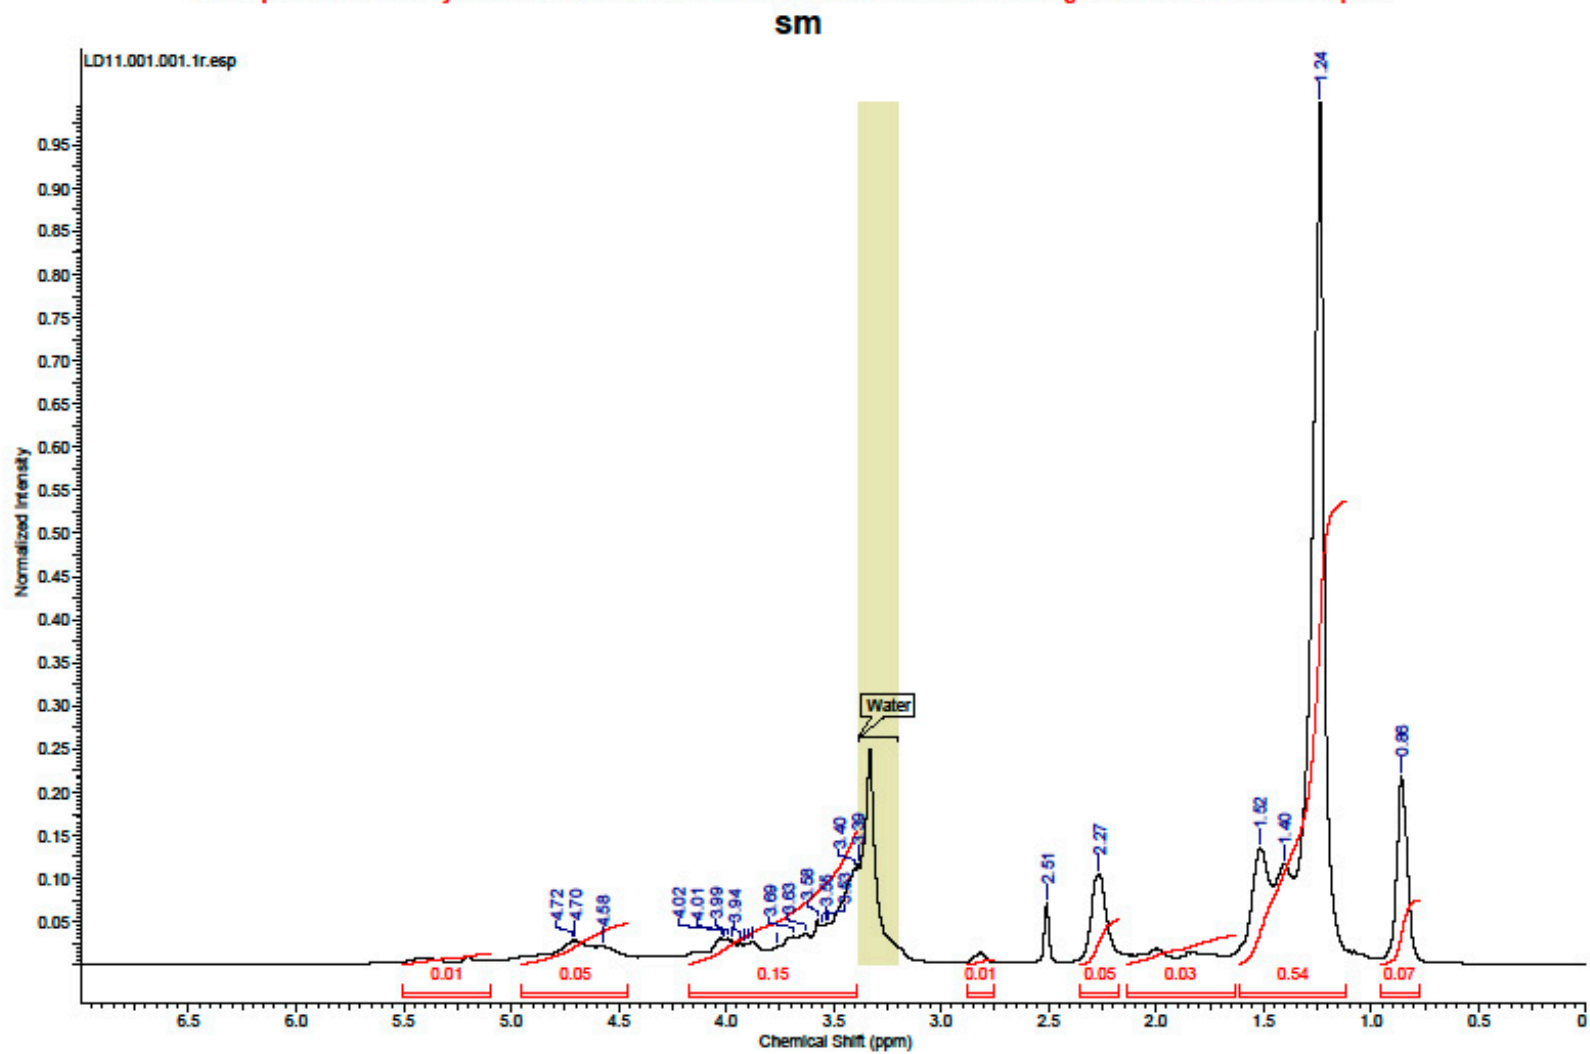

*Esters 18e (Polyglycerol + epoxidized soybean oil FAME 1:7)*

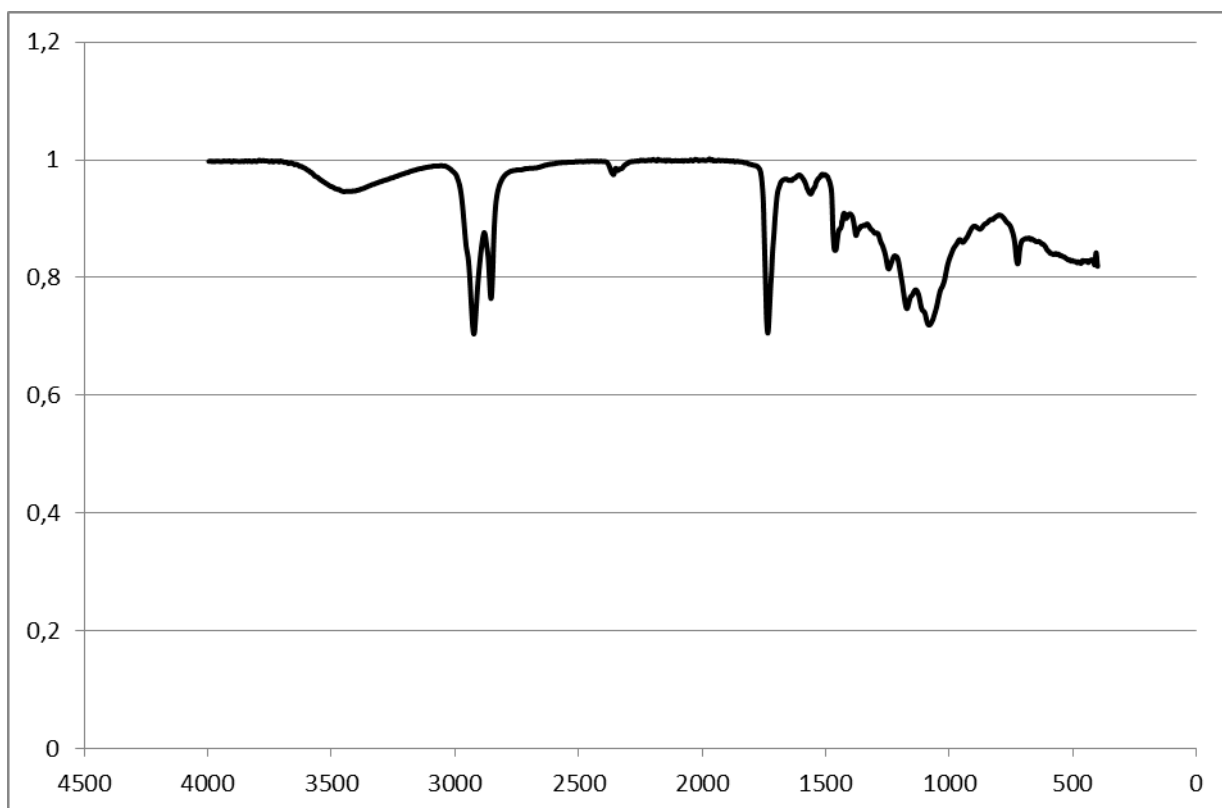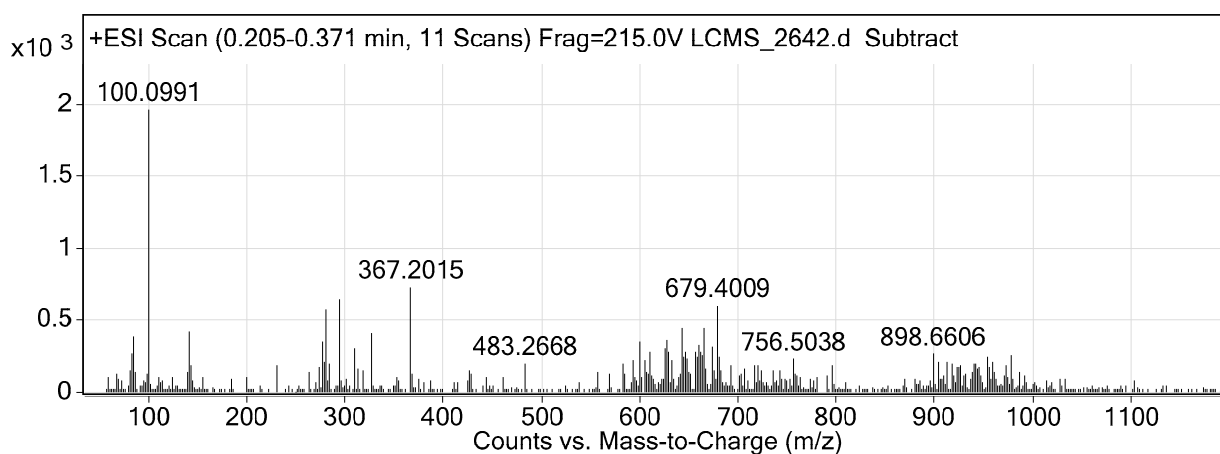

| m/z      | Species | Abund   | Abund % |
|----------|---------|---------|---------|
| 59,0581  |         | 100,04  | 5,09    |
| 68,0642  |         | 131,98  | 6,72    |
| 81,0605  |         | 154,15  | 7,85    |
| 83,0785  |         | 269,91  | 13,74   |
| 84,0921  |         | 388,05  | 19,76   |
| 86,0891  |         | 142,4   | 7,25    |
| 98,1022  |         | 107,02  | 5,45    |
| 99,0874  |         | 132,25  | 6,73    |
| 100,0991 |         | 1964,16 | 100     |

|          |  |        |       |
|----------|--|--------|-------|
| 100,1184 |  | 642,7  | 32,72 |
| 110,111  |  | 109,8  | 5,59  |
| 124,0978 |  | 107,39 | 5,47  |
| 140,2316 |  | 137,1  | 6,98  |
| 142,22   |  | 194,79 | 9,92  |
| 142,2416 |  | 330,88 | 16,85 |
| 142,2771 |  | 419,9  | 21,38 |
| 142,3099 |  | 198,25 | 10,09 |
| 142,327  |  | 115,63 | 5,89  |
| 143,0361 |  | 100,61 | 5,12  |
| 143,1681 |  | 183,98 | 9,37  |
| 200,1735 |  | 108,05 | 5,5   |
| 230,2171 |  | 188,03 | 9,57  |
| 263,2033 |  | 145,72 | 7,42  |
| 274,2392 |  | 176,83 | 9     |
| 277,1826 |  | 349,76 | 17,81 |
| 277,2157 |  | 115,06 | 5,86  |
| 279,1958 |  | 216,49 | 11,02 |
| 279,234  |  | 102,72 | 5,23  |
| 281,2158 |  | 573,53 | 29,2  |
| 281,2457 |  | 137,68 | 7,01  |
| 284,2969 |  | 134,29 | 6,84  |
| 284,3294 |  | 202,5  | 10,31 |
| 295,1929 |  | 648,91 | 33,04 |
| 295,2246 |  | 185,49 | 9,44  |
| 309,2016 |  | 303    | 15,43 |
| 309,2294 |  | 128,26 | 6,53  |
| 313,1971 |  | 166,8  | 8,49  |
| 313,2289 |  | 155,9  | 7,94  |
| 318,2605 |  | 153,71 | 7,83  |
| 327,2135 |  | 411,06 | 20,93 |
| 327,2507 |  | 210,87 | 10,74 |
| 353,205  |  | 103,25 | 5,26  |
| 353,2268 |  | 106,51 | 5,42  |
| 367,2015 |  | 730,39 | 37,19 |
| 367,2393 |  | 220,94 | 11,25 |
| 368,205  |  | 131,48 | 6,69  |
| 369,1508 |  | 127,84 | 6,51  |
| 427,246  |  | 147,78 | 7,52  |
| 429,2668 |  | 124,13 | 6,32  |
| 443,2797 |  | 101,66 | 5,18  |
| 461,2649 |  | 107,01 | 5,45  |
| 483,2359 |  | 155,23 | 7,9   |
| 483,2668 |  | 201,66 | 10,27 |
| 557,2753 |  | 138,26 | 7,04  |
| 569,4448 |  | 133,42 | 6,79  |
| 583,4227 |  | 201,01 | 10,23 |
| 584,4204 |  | 123,88 | 6,31  |
| 593,4149 |  | 224,82 | 11,45 |
| 594,4112 |  | 108,87 | 5,54  |
| 600,4492 |  | 353,41 | 17,99 |
| 600,4989 |  | 125,99 | 6,41  |
| 601,4512 |  | 108,45 | 5,52  |
| 605,4001 |  | 228,27 | 11,62 |

|          |  |        |       |
|----------|--|--------|-------|
| 605,4581 |  | 103,73 | 5,28  |
| 607,4051 |  | 144,09 | 7,34  |
| 609,4317 |  | 133,46 | 6,79  |
| 611,4349 |  | 278,88 | 14,2  |
| 612,4514 |  | 120,49 | 6,13  |
| 625,4146 |  | 213,2  | 10,85 |
| 625,4433 |  | 141,26 | 7,19  |
| 625,4818 |  | 104,04 | 5,3   |
| 626,4479 |  | 300,36 | 15,29 |
| 627,4539 |  | 148,31 | 7,55  |
| 628,4713 |  | 366,73 | 18,67 |
| 629,4099 |  | 166,71 | 8,49  |
| 629,4641 |  | 276,42 | 14,07 |
| 633,4125 |  | 218,31 | 11,11 |
| 640,4259 |  | 100,48 | 5,12  |
| 641,4251 |  | 127,57 | 6,5   |
| 642,4479 |  | 419,3  | 21,35 |
| 642,5112 |  | 156,4  | 7,96  |
| 643,4411 |  | 447,53 | 22,78 |
| 644,4212 |  | 179,06 | 9,12  |
| 644,4711 |  | 243,27 | 12,39 |
| 647,4099 |  | 279,2  | 14,21 |
| 648,4086 |  | 233,46 | 11,89 |
| 649,4068 |  | 144,07 | 7,34  |
| 651,4084 |  | 127,17 | 6,47  |
| 657,4215 |  | 279,32 | 14,22 |
| 658,4398 |  | 248,57 | 12,66 |
| 660,4606 |  | 323,94 | 16,49 |
| 661,3715 |  | 123,81 | 6,3   |
| 661,4326 |  | 279,62 | 14,24 |
| 663,4016 |  | 255,33 | 13    |
| 665,4161 |  | 441,56 | 22,48 |
| 665,47   |  | 120,54 | 6,14  |
| 666,4213 |  | 175,9  | 8,96  |
| 667,4299 |  | 168,49 | 8,58  |
| 674,4604 |  | 320,86 | 16,34 |
| 675,4398 |  | 157,44 | 8,02  |
| 679,4009 |  | 602,92 | 30,7  |
| 679,4606 |  | 162,85 | 8,29  |
| 680,3985 |  | 245,55 | 12,5  |
| 680,4503 |  | 210,46 | 10,72 |
| 681,405  |  | 116,47 | 5,93  |
| 682,5124 |  | 149,71 | 7,62  |
| 693,387  |  | 189,1  | 9,63  |
| 702,4801 |  | 112,84 | 5,74  |
| 703,4372 |  | 132,19 | 6,73  |
| 707,4408 |  | 159,79 | 8,14  |
| 716,4875 |  | 187,76 | 9,56  |
| 716,5333 |  | 106,78 | 5,44  |
| 717,4695 |  | 135,41 | 6,89  |
| 721,4424 |  | 188,73 | 9,61  |
| 723,4387 |  | 114,64 | 5,84  |
| 724,5287 |  | 147,68 | 7,52  |
| 735,4675 |  | 148,43 | 7,56  |

|           |  |        |       |
|-----------|--|--------|-------|
| 742,5193  |  | 149,99 | 7,64  |
| 756,5038  |  | 231,26 | 11,77 |
| 758,4843  |  | 129,46 | 6,59  |
| 759,5039  |  | 113,31 | 5,77  |
| 763,4785  |  | 101,82 | 5,18  |
| 781,4624  |  | 104,42 | 5,32  |
| 790,4925  |  | 114,66 | 5,84  |
| 795,4825  |  | 189,16 | 9,63  |
| 898,6606  |  | 268,03 | 13,65 |
| 898,7154  |  | 104,82 | 5,34  |
| 903,6144  |  | 212,69 | 10,83 |
| 909,6463  |  | 119,47 | 6,08  |
| 912,6387  |  | 211,91 | 10,79 |
| 913,6228  |  | 103,47 | 5,27  |
| 917,5879  |  | 195,82 | 9,97  |
| 920,6371  |  | 113,72 | 5,79  |
| 922,6563  |  | 115,46 | 5,88  |
| 923,6352  |  | 179,56 | 9,14  |
| 924,6633  |  | 177,01 | 9,01  |
| 926,6545  |  | 191,99 | 9,77  |
| 927,6425  |  | 102,55 | 5,22  |
| 929,6077  |  | 111,98 | 5,7   |
| 931,602   |  | 130,91 | 6,67  |
| 932,6175  |  | 106,14 | 5,4   |
| 938,643   |  | 139,11 | 7,08  |
| 939,6217  |  | 102,5  | 5,22  |
| 940,6611  |  | 204,95 | 10,43 |
| 941,6674  |  | 202,68 | 10,32 |
| 943,6171  |  | 161,06 | 8,2   |
| 944,6092  |  | 147,52 | 7,51  |
| 945,6214  |  | 174,85 | 8,9   |
| 945,6813  |  | 100,21 | 5,1   |
| 946,6319  |  | 113,74 | 5,79  |
| 954,6449  |  | 242,95 | 12,37 |
| 955,6311  |  | 144,02 | 7,33  |
| 956,6257  |  | 178,83 | 9,1   |
| 959,5988  |  | 205,85 | 10,48 |
| 959,6709  |  | 207,56 | 10,57 |
| 961,6181  |  | 139,66 | 7,11  |
| 970,635   |  | 112,41 | 5,72  |
| 972,6546  |  | 186,03 | 9,47  |
| 973,5736  |  | 127,09 | 6,47  |
| 973,6612  |  | 183,29 | 9,33  |
| 974,6347  |  | 107,06 | 5,45  |
| 975,5839  |  | 106,58 | 5,43  |
| 977,6167  |  | 254,57 | 12,96 |
| 977,6771  |  | 101,33 | 5,16  |
| 978,6222  |  | 141,66 | 7,21  |
| 986,6382  |  | 138,79 | 7,07  |
| 987,6459  |  | 106,64 | 5,43  |
| 991,6041  |  | 116,98 | 5,96  |
| 1252,8781 |  | 111,84 | 5,69  |
| 1257,8235 |  | 101,28 | 5,16  |

This report was created by ACD/NMR Processor Academic Edition. For more information go to [www.acdlabs.com/nmrproc/](http://www.acdlabs.com/nmrproc/)

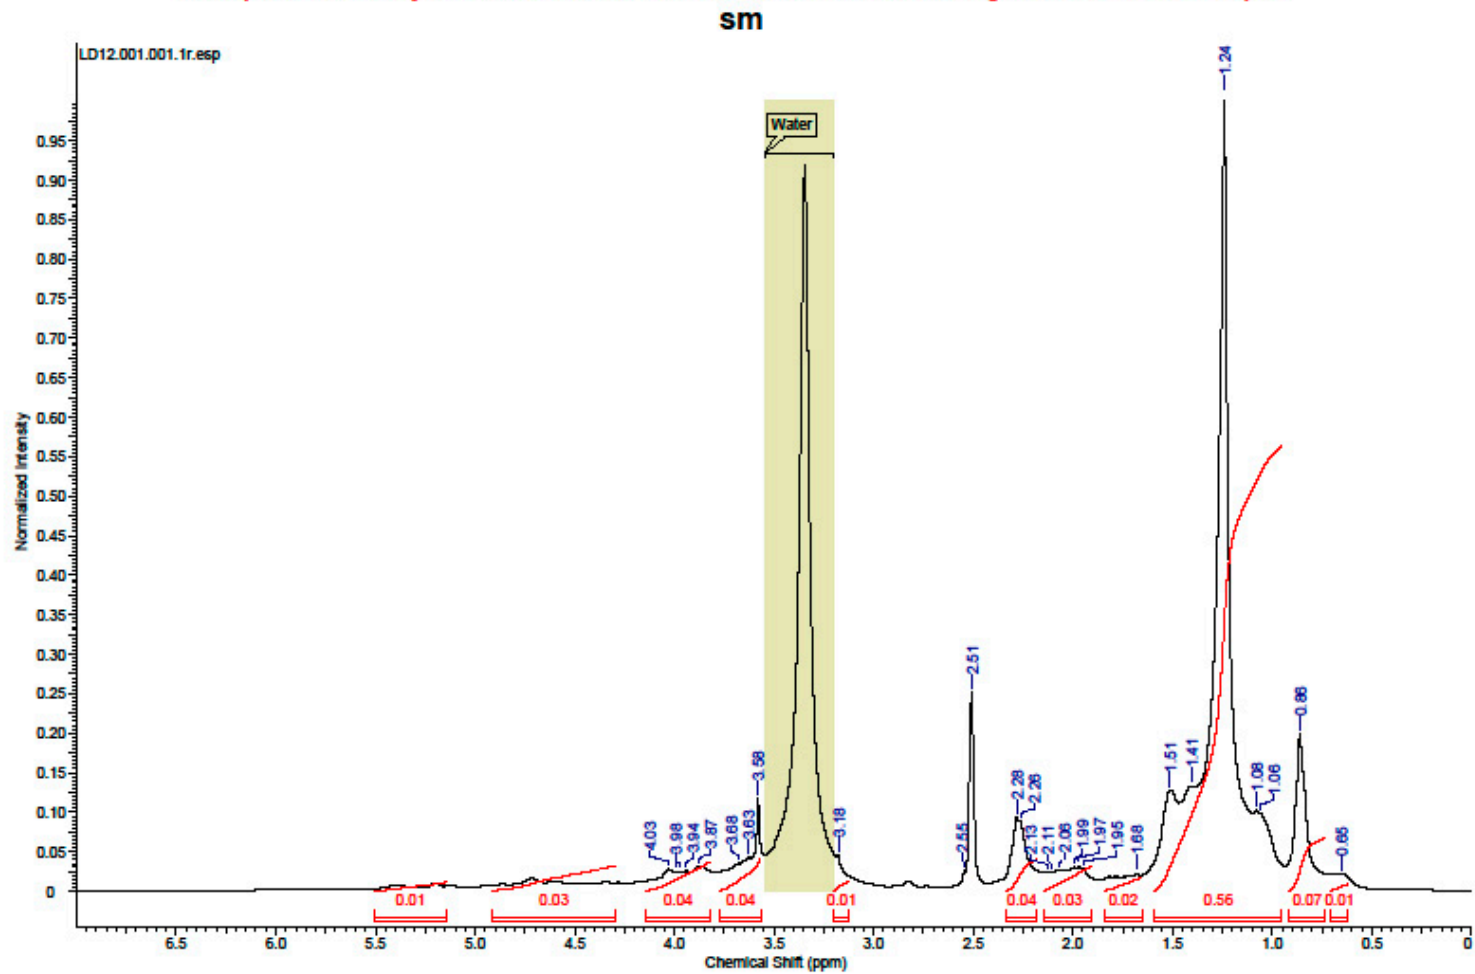

Supplement: Supplementary file 1 [file supplementary]
